# Supplementary material for: Job burnout among critical care nurses from 14 adult intensive care units in northeastern China: a cross-sectional survey
Source: PubMed Central journal article supplement — BMJ Open. 2014 Jun 19;4(6):e004813. doi: 10.1136/bmjopen-2014-004813 (PMC4067832; doi:10.1136/bmjopen-2014-004813), 2014-06-19
Supplement: bmjopen-2014-004813.draft_revisions.pdf [file bmjopen-2014-004813.draft_revisions.pdf]

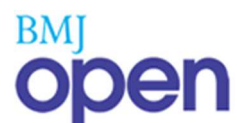

**Job burnout among critical care nurses from 14 adult ICUs  
in northeastern China: the cross-sectional design based  
SUBLIN study**

|                                 |                                                                                                                                                                                                       |
|---------------------------------|-------------------------------------------------------------------------------------------------------------------------------------------------------------------------------------------------------|
| Journal:                        | <i>BMJ Open</i>                                                                                                                                                                                       |
| Manuscript ID:                  | bmjopen-2014-004813                                                                                                                                                                                   |
| Article Type:                   | Research                                                                                                                                                                                              |
| Date Submitted by the Author:   | 08-Jan-2014                                                                                                                                                                                           |
| Complete List of Authors:       | Zhang, Xiao-Chun; The First Affiliated Hospital, China Medical University, Cardiology<br>Guan, Peng; China Medical University, Epidemiology<br>Huang, De-Sheng; China Medical University, Mathematics |
| <b>Primary Subject Heading</b>: | Epidemiology                                                                                                                                                                                          |
| Secondary Subject Heading:      | Nursing                                                                                                                                                                                               |
| Keywords:                       | Burnout, Intensive Care Units, nurses                                                                                                                                                                 |
|                                 |                                                                                                                                                                                                       |

SCHOLARONE™  
Manuscripts

1 **Job burnout among critical care nurses from 14 adult ICUs in northeastern China:**  
2 **the cross-sectional design based SUBLIN study**

3 Xiao-Chun Zhang<sup>1</sup>, De-Sheng Huang<sup>2</sup>, Peng Guan<sup>3</sup>

4 <sup>1</sup> Cardiac Critical Care Unit, Department of Cardiology, The First Affiliated Hospital, China Medical  
5 University, Shenyang 110001, China.

6 <sup>2</sup> Department of Mathematics, College of Basic Medical Sciences, China Medical University,  
7 Shenyang 110001, China.

8 <sup>3</sup> Department of Epidemiology, School of Public Health, China Medical University, Shenyang  
9 110001, China.

10

11 **§Corresponding author:** Peng Guan, Department of Epidemiology, School of Public Health,  
12 China Medical University, Shenyang 110001, China; Phone:+86-24-23256666 ext. 5401; Fax: +86-  
13 24-23258982; E-mail: pguan@mail.cmu.edu.cn

14

15 **Key words:** Burnout, Intensive Care Units, nurses

16 **Word count (main text):** 1866 words

1  
2  
3  
4  
5  
6  
7  
8  
9  
10  
11  
12  
13  
14  
15  
16  
17  
18  
19  
20  
21  
22  
23  
24  
25  
26  
27  
28  
29  
30  
31  
32  
33  
34  
35  
36  
37  
38  
39  
40  
41  
42  
43  
44  
45  
46  
47  
48  
49  
50  
51  
52  
53  
54  
55  
56  
57  
58  
59  
60

1 **ABSTRACT**

2 **Objectives** The shortage of qualified nurses is one of the critical challenges in the field of  
3 healthcare. Among the contributing factors, job burnout has been indicated as a risk factor of the  
4 intention to leave. The purpose of this study was to provide a better understanding of the local  
5 status and reference data for coping strategies of ICU nurse burnout among Liaoning ICU Nurses.

6 **Design** Observational study.

7 **Setting** Fourteen ICUs from 10 tertiary level hospitals in Liaoning, China.

8 **Primary measures** Burnout was measured with the 22-item Chinese version of Maslach Burnout  
9 Inventory (MBI) questionnaires.

10 **Results** The study population is a young population, with the median age 25 years old,  
11 interquartile range 19 to 52 years old and female nurses accounted the major part (88.5%). Sixty-  
12 eight nurses (16.0%) were found to have a high degree of burnout, earning high EE and DP scores  
13 together with a low PA score.

14 **Conclusions** The present study indicated the moderate distribution of burnout among ICU nurses  
15 in Liaoning, China. This kind of investigation into the burnout level of this population could catch  
16 more attention to ICU caregivers.

1  
2  
3  
4  
5  
6  
7  
8  
9  
10  
11  
12  
13  
14  
15  
16  
17  
18  
19  
20  
21  
22  
23  
24  
25  
26  
27  
28  
29  
30  
31  
32  
33  
34  
35  
36  
37  
38  
39  
40  
41  
42  
43  
44  
45  
46  
47  
48  
49  
50  
51  
52  
53  
54  
55  
56  
57  
58  
59  
60

## 1 Strengths and limitations of this study

- 2 ● This is the first study to state the actual, overall situation regarding burnout status among  
3 ICU nurses in Liaoning, China, to the best of the authors' knowledge.
- 4 ● This multi-center 'Study to Understand Burnout among Liaoning ICU Nurses' revealed that  
5 as many as 16% of the ICU nursing team showed a high level of burnout in all emotional  
6 exhaustion (EE), depersonalization (DP) and personal accomplishment (PA) dimensions.
- 7 ● There may have been important differences of various clinical settings, for example, work  
8 climate, the characteristics of the patients, work load, relationship between doctors and  
9 nurses, institutional policy, coping strategies and etc, the results are not generalizable to all  
10 Chinese ICU nurses as a whole.
- 11 ● The researcher in each participating ICU was the ICU head nurse, and to some extent, the  
12 firsthand acquaintance might affect the information those nurses provided.

## 1 INTRODUCTION

2 Around the world, the shortage of qualified nurses is one of the critical challenges in the field of  
3 healthcare.[1-3] This shortage is a multidimensional phenomenon,[4,5] and can be attributed to low  
4 job satisfaction, lack of managerial support, poor career opportunities and etc.[6,7] Among the  
5 contributing factors, job burnout has been indicated as a risk factor of the intention to leave.

6 According to the nature, nursing is a stressful occupation due to the direct exposure to various  
7 kinds of working environments and conditions which include anxiety and depression. In China, the  
8 Chinese public is greatly dissatisfied with the high cost and low quality of health care.[8-11]

9 The study communities, Intensive Care Units (ICU) nurses were selected for three main reasons.  
10 First, as just described, with the background of China public's dissatisfaction and the high costs of  
11 intensive care, there is tense relationship between doctors and patients. More efforts have been  
12 made to improve quality of life for patients, while the care providers deserve equal attention.

13 Second, noises, light and the radiation from those monitoring equipment that run all day long pose  
14 direct impact to the ICU nurses. Third, critical care medicine was accredited as an independent  
15 subspecialty of clinical medicine by Ministry of Health of the People's Republic of China just in  
16 January 2009. Critical care courses and educational programs taught at hospitals and universities  
17 with various kinds of duration and clinical practice are established to meet the crying need of  
18 training during the infancy stage of critical care research in mainland China.[12] Those in-service  
19 ICU nurses are the main part of supporting faculty for those training. Clear picture about the  
20 burnout status can provide some background information for the target solutions.

21 To provide a better understanding of the local status and reference data for coping strategies of  
22 ICU nurse burnout, the present cross-sectional study, 'Study to Understand Burnout among  
23 Liaoning ICU Nurses (the SUBLIN study)', was conducted to report findings.

## 24 METHODS

### 25 Study units and subjects

26 A cross-sectional survey was conducted during October and November 2010 in Liaoning province,  
27 northeastern China. The ICU nurses that work in the 17 intensive care units from 10 tertiary level  
28 hospitals were selected as the target population. The principal investigator and co-principal

1 investigators contacted the head nurse of each participating ICUs via meeting or telephone to  
2 share the project objectives and collect the feedback on the questionnaire to be used. After the  
3 questionnaire approved by the project core team member and the head nurses of included ICUs,  
4 those head nurses assisted in contacting the nurse staff in first-line clinical positions who agreed to  
5 participate and arranging the schedule that the nurse could be available. The self-administered  
6 anonymous questionnaire addressed demographic data and burnout was adopted during the  
7 interview. Demographic information included age, gender, education level, marital status,  
8 professional title, the entire period of employment as a nurse and an ICU nurse. All the ICU nurses  
9 were in a sufficiently good physical and mental condition to provide reliable answers. The study  
10 was conducted after obtaining institutional ethical clearance and all the participants provided oral  
11 informed consent.

## 12 **Measurement of burnout**

13 Burnout was measured with the Chinese version of Maslach Burnout Inventory (MBI)  
14 questionnaires. It consists of three dimensions: emotional exhaustion (EE), depersonalization (DP)  
15 and personal accomplishment (PA). The total scale consists of 22 items, among which the EE  
16 dimension is measured by nine items, the DP dimension is measured by five items, and the  
17 measurement of PE dimension is based on eight items. Each of the items is scored on a Likert  
18 scale from 0 to 6. The score are defined according to how often the statement is experienced, from  
19 'never' (0) to 'every day' (6). Higher scores on the EE and DP dimensions and lower scores on the  
20 PA dimension indicate higher level of burnout. Cut-off criteria of the MBI were EE: low, less than 19,  
21 moderate, 19-26, high more than 26, DP: low: less than 6, moderate, 6-9, high, more than 9, and  
22 PA: low, more than 39, moderate 34-39, high, less than 34. Given the fact that the definition of  
23 burnout is still controversial, in the present study those individuals that with high EE scores and DP  
24 scores together with a low PA score were identified as having a high degree of burnout,[13] and  
25 the distribution data in each subscale was also provided.

## 26 **Statistical analysis**

27 Age group was classified as <30, 30 to 40 and >40 years. Years of experience as a registered  
28 nurse was grouped as <5, 5-10, 11-19 and more than Comparisons of MBI scores for

1 demographics and years of experience as a registered nurse or an ICU nurse were tested by the  
2 Student t-test, ANOVA, and Chi-square test. The Student t-test and ANOVA were done using  
3 SPSS software (SPSS 12.0 for windows, SPSS Inc., Chicago, IL, USA). The Chi-square test was  
4 performed with the software Epi Info™ 3.4.3 (Version 3.4.3 Centers for Disease Control and  
5 Prevention, Atlanta, GA, USA). All the P values were two-sided with the P-value less than 0.05  
6 considered as statistically significant.

## 7 **RESULTS**

8 Among the invited 17 ICUs, 14 ICUs from 10 tertiary level hospitals responded actively and were  
9 included in the present study. All the ICUs were closed-type ICU with the available 24-hour a day  
10 presence of junior or internmediate intensivist, and all the nurses' working-shift was 12-hour shift.  
11 The characteristics of the 14 included ICUs are shown in Table 1. For the 10 hospitals, half were  
12 university and university affiliated hospitals, 3 hospitals with more than 2,000 beds and the biggest  
13 one with 4,300 beds. The number of admissions in each included ICUs varied from 120 to 890 per  
14 year.

**Table 1 Characteristics of 14 included Intensive Care Units in Liaoning province, China, the SUBLIN study**

| Characteristics                             | Number (% or interquartile)                                                         |
|---------------------------------------------|-------------------------------------------------------------------------------------|
| Type of hospital                            |                                                                                     |
| University and University affiliated        | 5 (50%)                                                                             |
| Public                                      | 5 (50%)                                                                             |
| Number of Hospital beds (in 2009)           |                                                                                     |
| ≥ 1000                                      | 5 (50%, )                                                                           |
| < 1000                                      | 5 (50%)                                                                             |
| ICU treatment provision by patient category |                                                                                     |
| Medical                                     | 10 (71.4%)                                                                          |
| Surgical                                    | 4 (28.6%)                                                                           |
| Number of ICU beds                          | Median: 12<br>Interval: 6-28<br>Interquartile interval: 9-15                        |
| Number of ICU admissions per year           | Median: 300<br>Interval: 120-890<br>Interquartile interval: 165-600                 |
| ICU mortality in 2009 (%)                   | Median: 14.3%<br>Interval: 4.5%-21.0%<br>Interquartile interval: 9.2%-16.7%         |
| Average ICU length of stay (days)           | Median: 6.3<br>Interval: 3-30<br>Interquartile interval: 4.5-12.3                   |
| Number of ICU nurses                        | Median: 26<br>Interval: 10-76<br>Interquartile interval: 19-35                      |
| Patient-to-nurse ratio                      | Median: 2.2:1<br>Interval: 2.9:1 to 1.3:1<br>Interquartile interval: 2.5:1 to 1.9:1 |



1 After the introduction of the study objectives provided for 431 participants, five nurses finally  
2 refused to join and 426 copies of complete questionnaires were returned. The study population  
3 was a young population, with the median age 25 years old, interquartile range 19 to 52 years old  
4 and female nurses accounted the major part (88.5%). Sixty-eight nurses (16.0%) were found to  
5 have a high degree of burnout, earning high EE and DP scores together with a low PA score. The  
6 proportion difference with statistical significance was only found in the group defined according to  
7 the years of experience as a registered nurse. About one quarter of those nurses that had been  
8 working as a registered nurse for 5 to 10 years had a high degree of burnout (Table 2).  
9  
10 When evaluated in each EE, DP and PA subscale, 184, 111 and 177 nurses stayed at the high  
11 level of burnout, respectively. Thus the most pronounced symptoms of burnout were emotional  
12 exhaustion and personal accomplishment. Among all the studied variables, the statistical  
13 significance was found for the DP scores among the nurses that with different education level,  
14 nurses that hold a junior college diploma were with a higher DP score when compared with the  
15 other two counterparts (Table 2).

**Table 2 Sociodemographic characteristics of the ICU nurses in Liaoning province, China, the SUBLIN study**

| Variables                                                                                  | Number (%)   | Number of nurses having a high degree of burnout | EE          |     |          | DP   |           |     | PA       |      |             |     |          |      |
|--------------------------------------------------------------------------------------------|--------------|--------------------------------------------------|-------------|-----|----------|------|-----------|-----|----------|------|-------------|-----|----------|------|
|                                                                                            |              |                                                  | Mean±SD     | Low | Moderate | High | Mean      | Low | Moderate | High | Mean        | Low | Moderate | High |
|                                                                                            |              | 68                                               | 24.55±12.36 | 149 | 93       | 184  | 7.05±6.50 | 214 | 101      | 111  | 35.08±9.36  | 154 | 95       | 177  |
| <b>Gender</b>                                                                              |              |                                                  |             |     |          |      |           |     |          |      |             |     |          |      |
| Female                                                                                     | 377 (88.5%)  | 59                                               | 24.49±12.58 | 136 | 80       | 161  | 6.97±6.55 | 194 | 86       | 97   | 35.14±9.62  | 143 | 79       | 155  |
| Male                                                                                       | 49 (11.5%)   | 9                                                | 25.06±4.53  | 13  | 13       | 23   | 7.65±6.18 | 20  | 15       | 14   | 34.69±7.12  | 11  | 16       | 22   |
| <i>P</i> value                                                                             |              | 0.63                                             | 0.73        |     | 0.39     |      | 0.49      |     | 0.33     |      | 0.70        |     | 0.06     |      |
| <b>Age</b> (years, Median, 25 yrs; interval, 19-52 yrs; interquartile interval, 23-28 yrs) |              |                                                  |             |     |          |      |           |     |          |      |             |     |          |      |
| <30                                                                                        | 357 (83.8%)  | 56                                               | 24.61±12.29 | 123 | 81       | 153  | 7.18±6.45 | 174 | 86       | 97   | 34.91±9.22  | 123 | 84       | 150  |
| 30-40                                                                                      | 62 (14.6%)   | 11                                               | 24.29±12.84 | 24  | 10       | 28   | 6.50±6.76 | 35  | 14       | 13   | 35.79±10.36 | 28  | 9        | 25   |
| >40                                                                                        | 7 (1.6%)     | 1                                                | 24.14±13.50 | 2   | 2        | 3    | 5.14±5.90 | 5   | 1        | 1    | 37.71±7.68  | 3   | 2        | 2    |
| <i>P</i> value                                                                             |              | 0.91                                             | 0.98        |     | 0.81     |      | 0.55      |     | 0.60     |      | 0.60        |     | 0.39     |      |
| <b>Highest level of nurse education</b>                                                    |              |                                                  |             |     |          |      |           |     |          |      |             |     |          |      |
| Secondary nursing school                                                                   | 57 (13.4 %)  | 7                                                | 24.98±12.98 | 19  | 13       | 25   | 6.49±5.90 | 29  | 15       | 13   | 34.00±10.02 | 17  | 12       | 28   |
| Junior college                                                                             | 219 (51.4 %) | 40                                               | 25.04±12.05 | 73  | 47       | 99   | 7.81±6.90 | 101 | 54       | 64   | 34.68±8.97  | 71  | 56       | 92   |
| Bachelor and Master                                                                        | 150 (35.2%)  | 21                                               | 23.68±12.61 | 57  | 33       | 60   | 6.15±6.00 | 84  | 32       | 34   | 36.08±9.64  | 66  | 27       | 57   |
| <i>P</i> value                                                                             |              | 0.39                                             | 0.56        |     | 0.88     |      | 0.04      |     | 0.40     |      | 0.24        |     | 0.11     |      |
| <b>Job rank</b>                                                                            |              |                                                  |             |     |          |      |           |     |          |      |             |     |          |      |
| Nurse or nurse student                                                                     | 288 (67.6%)  | 40                                               | 24.29±11.97 | 100 | 66       | 122  | 7.01±6.33 | 143 | 73       | 72   | 35.20±8.83  | 104 | 67       | 117  |
| Nurse Practitioner                                                                         | 95 (22.3%)   | 22                                               | 25.51±12.48 | 31  | 23       | 41   | 7.51±7.11 | 47  | 18       | 30   | 34.18±10.04 | 28  | 23       | 44   |
| Nurse-in-charge and higher                                                                 | 43 (10.1%)   | 6                                                | 24.19±14.72 | 18  | 4        | 21   | 6.30±6.32 | 24  | 10       | 9    | 36.30±11.23 | 22  | 5        | 16   |
| <i>P</i> value                                                                             |              | 0.09                                             | 0.70        |     | 0.33     |      | 0.59      |     | 0.52     |      | 0.44        |     | 0.13     |      |
| <b>Marital status</b>                                                                      |              |                                                  |             |     |          |      |           |     |          |      |             |     |          |      |
| Unmarried                                                                                  | 277 (65.0%)  | 38                                               | 24.35±12.48 | 99  | 60       | 118  | 6.96±6.46 | 140 | 68       | 69   | 35.12±9.20  | 99  | 67       | 111  |

|                                                                                                                       |                |      |             |     |      |     |           |     |      |    |             |     |      |     |
|-----------------------------------------------------------------------------------------------------------------------|----------------|------|-------------|-----|------|-----|-----------|-----|------|----|-------------|-----|------|-----|
| Married                                                                                                               | 149<br>(35.0%) | 30   | 24.93±12.17 | 50  | 33   | 66  | 7.21±6.59 | 74  | 33   | 42 | 35.02±9.70  | 55  | 28   | 66  |
| <i>P</i> value                                                                                                        |                | 0.08 | 0.65        |     | 0.90 |     | 0.70      |     | 0.72 |    | 0.92        |     | 0.42 |     |
| <b>Years of experience as a registered nurse</b> (Median, 3 yrs; interval, 0-32 yrs; interquartile interval, 3-7 yrs) |                |      |             |     |      |     |           |     |      |    |             |     |      |     |
| <5                                                                                                                    | 268<br>(62.9%) | 33   | 23.54±12.10 | 102 | 59   | 107 | 6.90±6.40 | 137 | 66   | 65 | 35.43±9.21  | 99  | 61   | 108 |
| 5-10                                                                                                                  | 107<br>(25.1%) | 27   | 27.38±12.33 | 29  | 24   | 54  | 7.99±6.99 | 47  | 23   | 37 | 33.58±8.95  | 30  | 27   | 50  |
| 11-19                                                                                                                 | 39<br>(9.2%)   | 6    | 23.87±13.52 | 13  | 8    | 18  | 5.62±5.64 | 23  | 9    | 7  | 36.15±11.22 | 19  | 5    | 15  |
| 20 or more                                                                                                            | 12<br>(2.8%)   | 2    | 24.00±12.15 | 5   | 2    | 5   | 6.50±6.36 | 7   | 3    | 2  | 37.33±9.37  | 6   | 2    | 4   |
| <i>P</i> value                                                                                                        |                | 0.02 | 0.06        |     | 0.54 |     | 0.23      |     | 0.35 |    | 0.23        |     | 0.27 |     |
| <b>Years of experience as an ICU nurse</b> (Median, 2 yrs; interval, 0-20 yrs; interquartile interval, 1-4 yrs)       |                |      |             |     |      |     |           |     |      |    |             |     |      |     |
| <5                                                                                                                    | 332<br>(77.9%) | 46   | 23.89±12.07 | 123 | 73   | 136 | 6.84±6.35 | 169 | 82   | 81 | 35.32±9.19  | 121 | 77   | 134 |
| 5-10                                                                                                                  | 82<br>(19.2%)  | 20   | 27.38±13.44 | 22  | 18   | 42  | 7.83±7.18 | 40  | 14   | 28 | 33.65±9.92  | 26  | 17   | 39  |
| 10-19                                                                                                                 | 10<br>(2.3%)   | 2    | 24.00±11.08 | 3   | 2    | 5   | 7.70±6.15 | 4   | 4    | 2  | 37.20±10.22 | 5   | 1    | 4   |
| 20 or more                                                                                                            | 2<br>(0.5%)    | 0    | 21.50±12.02 | 1   | 0    | 1   | 5.50±3.54 | 1   | 1    | 0  | 44.00±4.24  | 2   | 0    | 0   |
| <i>P</i> value                                                                                                        |                | 0.11 | 0.15        |     | 0.63 |     | 0.63      |     | 0.35 |    | 0.22        |     | 0.40 |     |

SD: Standard deviation. Percentages may not add up to 100% due to rounding.

## 1 DISCUSSION

2 This multi-center study revealed that as many as 16% of the ICU nursing team  
3 showed a high level of burnout in all three dimensions. The highest proportion of  
4 high-degree burnout (43.2%) was found in the emotional exhaustion dimension,  
5 followed by 41.2% in personal accomplishment dimension and 26.1% in  
6 depersonalization dimension. Given the fact that the well-being of the ICU nurses is  
7 of critical importance to the quality of critically ill patients who are likely to benefit  
8 from ICU care, this kind of investigation into the burnout level of this population could  
9 catch more attention to ICU caregivers.

10 In Liaoning, China, there are still no complete epidemiologic data to state the actual,  
11 overall situation regarding burnout status among ICU nurses, to the best of our  
12 knowledge, this is the first burnout study among Liaoning ICU nurses. Most of the  
13 respondents indicated that the investigation from nurses' perspective might  
14 contribute to not only the mutual understanding between nurse leaders, ICU  
15 managers and nurses, but also their greater self-awareness of burnout. This study  
16 strengthened the power of the Critical Care Special Committee nested in Nursing  
17 Association of China Liaoning Branch and added an appeal to the nurse students to  
18 work in ICU.

19 The present study has its limitations. Firstly, although the rate of response to the  
20 questionnaire was excellent, five nurses refused to join the study after the  
21 introduction of the study objectives. This refusal might have been related to that they  
22 were already exhausted at that time due to various reasons, such as, heavy work  
23 load. Secondly, the researcher in each participating ICU was the ICU head nurse,  
24 and to some extent, the firsthand acquaintance might affect the information those  
25 nurses provided. We tried to minimize the kind of worry, the anonymous  
26 questionnaire was a structured questionnaire, the participants only needed to put a  
27 tick opposite each choice, the pen they used was also provided by the stationery

1 office of each hospital. Thus, it was difficult to trace the participant information  
2 according to these tick marks. Thirdly, the number of nurses in each participating  
3 hospital was more than one thousand, the demographic data from only three  
4 participating ICUs were available to compare the nurses who returned the  
5 questionnaire with the representative sample of total registered nurses population,  
6 and no statistical differences were found. In addition, there may have been important  
7 differences of various clinical settings, for example, work climate, the characteristics  
8 of the patients, work load, relationship between doctors and nurses, institutional  
9 policy, coping strategies and etc, the results are not generalizable to all Chinese ICU  
10 nurses as a whole.

11 This proportion of burnout (16% in all 3 dimensions, and 26.1% to 43.2% in each  
12 single subscale) among Liaoning ICU nurses that experienced a high degree of  
13 burnout is in the range of several recently published studies that reported the  
14 distribution of high-level burnout among ICU nurses, around one-third of the ICU  
15 nurses having a high level of burnout.[14-17]

16 This result might help the ICU head nurse to take some actions to explore the  
17 feelings, concerns and difficulties of ICU nurses and explore possible solutions and  
18 interventions correspondingly.[18,19] High-risk factors[20] and possible protective  
19 factors[21,22] that associated with burnout level in Liaoning ICU nurses, such as  
20 work environment, job satisfaction, social support and coping strategies will be  
21 explored in the next stage of the SUBLIN study.

22 **Appendix**-Study Team (SUBLIN Study), Chun-Mei Gu, Li-Huan Hu, Hong-Fei Li, Li-  
23 Hong Liu, Long-Feng Sun, Xuan Wang, Xiao-Jiang Yu, Jun-Li Zhang, Li-Hong Zhang,  
24 Shen-Ping Zhang, Wen-Jing Zhao, Li-Yuan Zheng.

## 25 **Acknowledgements**

26 This project was made possible by the efforts of 14 collaborative ICUs from 10  
27 hospitals and by the enthusiastic support and active participation of the nurses.

## Contributors

XCZ conceived of the study, participated in its design and coordination. XZ AND PG had full access to all of the data in the study, took responsibility for the integrity of the data and the accuracy of the data analysis and drafted the manuscript. DSH participated in its design, analysis and coordination, and helped to draft the manuscript. All authors reviewed and approved the final manuscript.

## Funding

This work was supported by the Natural Science Foundation of Liaoning Province, China, grant number 201320014. This work was also a part of the programme for Elaborate Course of Epidemiology and Key Disciplines Construction supported by China Medical University, grant number CMU Internal Circular-J-[2010]-16-31 and Internal Circular-F-[2011]-5).

## Competing interests

None

## REFERENCES

1. Nardi DA, Gyurko CC. The global nursing faculty shortage: status and solutions for change. *J Nurs Scholarsh* 2013;**45**:317-26.
2. Reinert J, Bigelow A, Kautz DD. Overcoming nursing faculty shortages and bridging the gap between education and practice. *J Nurses Staff Dev* 2012;**28**:216-8.
3. Ahmed SM, Hossain MA, Rajachowdhury AM, Bhuiya AU. The health workforce crisis in Bangladesh: shortage, inappropriate skill-mix and inequitable distribution. *Hum Resour Health* 2011;**9**:3.
4. Farsi Z, Dehghan-Nayeri N, Negarandeh R, *et al*. Nursing profession in Iran: an overview of opportunities and challenges. *Jpn J Nurs Sci* 2010;**7**:9-18.

- 1  
2  
3 1 5. Duvall JJ, Andrews DR. Using a structured review of the literature to identify key  
4 factors associated with the current nursing shortage. *J Prof Nurs* 2010;**26**:309-17.  
5  
6  
7 3 6. Wynn SD. Addressing the nursing workforce shortage: veterans as mental health  
8 nurses. *J Psychosoc Nurs Ment Health Serv* 2013;**51**:3-4.  
9  
10  
11 5 7. Chan ZC, Tam WS, Lung MK, *et al*. A systematic literature review of nurse  
12 shortage and the intention to leave. *J Nurs Manag* 2013;**21**:605-13.  
13  
14  
15 7 8. Hsiao WC. When incentives and professionalism collide. *Health Aff (Millwood)*  
16 2008;**27**:949-51.  
17  
18  
19 9 9. Ma J, Lu M, Quan H. From a national, centrally planned health system to a system  
20 based on the market: lessons from China. *Health Aff (Millwood)* 2008;**27**:937-48.  
21  
22  
23 10 10. Yu D, Li T. Facing up to the threat in China. *Lancet* 2010;**376**:1823-4.  
24  
25  
26 12 11. Wagstaff A, Yip W, Lindelow M, *et al*. China's health system and its reform: a  
27 review of recent studies. *Health Econ* 2009;**18**:S7-23.  
28  
29  
30 14 12. Du B, Xi X, Chen D, Peng J, *et al*. Clinical review: critical care medicine in  
31 mainland China. *Crit Care* 2010;**14**:206.  
32  
33  
34 16 13. Maslach C, Jackson SE. The measurement of experienced burnout. *J Occup*  
35 *Behav* 1981;**2**:99-113.  
36  
37  
38 18 14. Teixeira C, Ribeiro O, Fonseca AM, *et al*. Burnout in intensive care units - a  
39 consideration of the possible prevalence and frequency of new risk factors: a  
40 descriptive correlational multicentre study. *BMC Anesthesiol* 2013;**13**:38.  
41  
42  
43 21 15. Poncet MC, Toullic P, Papazian L, *et al*. Burnout syndrome in critical care nursing  
44 staff. *Am J Respir Crit Care Med* 2007;**175**:698-704.  
45  
46  
47  
48 23 16. Verdon M, Merlani P, Perneger T, *et al*. Burnout in a surgical ICU team. *Intensive*  
49 *Care Med* 2008;**34**:152-6.  
50  
51  
52  
53  
54  
55  
56  
57  
58  
59  
60

- 1  
2  
3 17. Liu K, You LM, Chen SX, *et al.* The relationship between hospital work  
4 environment and nurse outcomes in Guangdong, China: a nurse questionnaire  
5 survey. *J Clin Nurs* 2012;**21**:1476-85.  
6  
7  
8  
9 18. Yao Y, Yao W, Wang W, *et al.* Investigation of risk factors of psychological  
10 acceptance and burnout syndrome among nurses in China. *Int J Nurs Pract*  
11 2013;**19**:530-8.  
12  
13  
14  
15 19. Lei W, Youn Hee K, Dong W. A review of research and strategies for burnout  
16 among Chinese nurses. *Br J Nurs* 2010;**19**:844-50.  
17  
18  
19  
20 20. Karanikola MN, Papathanassoglou ED, Mpouzika M, *et al.* Burnout syndrome  
21 indices in Greek intensive care nursing personnel. *Dimens Crit Care Nurs*  
22 2012;**31**:94-101.  
23  
24  
25  
26 21. Quenot JP, Rigaud JP, Prin S, *et al.* Suffering among carers working in critical  
27 care can be reduced by an intensive communication strategy on end-of-life  
28 practices. *Intensive Care Med* 2012;**38**:55-61.  
29  
30  
31  
32 22. Beanland C. Tackling the workforce shortage. *Aust Nurs J* 2013;**20**:47-8.  
33  
34  
35  
36  
37  
38  
39  
40  
41  
42  
43  
44  
45  
46  
47  
48  
49  
50  
51  
52  
53  
54  
55  
56  
57  
58  
59  
60



**STROBE 2007 (v4) Statement—Checklist of items that should be included in reports  
of cross-sectional studies**

| Section/Topic                | Item # | Recommendation                                                                                                                                                                       | Reported on page # |
|------------------------------|--------|--------------------------------------------------------------------------------------------------------------------------------------------------------------------------------------|--------------------|
| Title and abstract           | 1      | (a) Indicate the study's design with a commonly used term in the title or the abstract                                                                                               | #1                 |
|                              |        | (b) Provide in the abstract an informative and balanced summary of what was done and what was found                                                                                  | #2                 |
| <b>Introduction</b>          |        |                                                                                                                                                                                      |                    |
| Background/rationale         | 2      | Explain the scientific background and rationale for the investigation being reported                                                                                                 | #4                 |
| Objectives                   | 3      | State specific objectives, including any prespecified hypotheses                                                                                                                     | #4                 |
| <b>Methods</b>               |        |                                                                                                                                                                                      |                    |
| Study design                 | 4      | Present key elements of study design early in the paper                                                                                                                              | #5                 |
| Setting                      | 5      | Describe the setting, locations, and relevant dates, including periods of recruitment, exposure, follow-up, and data collection                                                      | #5                 |
| Participants                 | 6      | (a) Give the eligibility criteria, and the sources and methods of selection of participants                                                                                          | #5                 |
| Variables                    | 7      | Clearly define all outcomes, exposures, predictors, potential confounders, and effect modifiers. Give diagnostic criteria, if applicable                                             | #5-#6              |
| Data sources/<br>measurement | 8*     | For each variable of interest, give sources of data and details of methods of assessment (measurement). Describe comparability of assessment methods if there is more than one group | #6                 |
| Bias                         | 9      | Describe any efforts to address potential sources of bias                                                                                                                            | #11                |
| Study size                   | 10     | Explain how the study size was arrived at                                                                                                                                            | #4                 |
| Quantitative variables       | 11     | Explain how quantitative variables were handled in the analyses. If applicable, describe which groupings were chosen and why                                                         | #6                 |
| Statistical methods          | 12     | (a) Describe all statistical methods, including those used to control for confounding                                                                                                | #6                 |
|                              |        | (b) Describe any methods used to examine subgroups and interactions                                                                                                                  | #6                 |
|                              |        | (c) Explain how missing data were addressed                                                                                                                                          | NA                 |
|                              |        | (d) If applicable, describe analytical methods taking account of sampling strategy                                                                                                   | NA                 |

|                          |     |                                                                                                                                                                                                              |         |
|--------------------------|-----|--------------------------------------------------------------------------------------------------------------------------------------------------------------------------------------------------------------|---------|
|                          |     | (e) Describe any sensitivity analyses                                                                                                                                                                        | NA      |
| <b>Results</b>           |     |                                                                                                                                                                                                              |         |
| Participants             | 13* | (a) Report numbers of individuals at each stage of study—eg numbers potentially eligible, examined for eligibility, confirmed eligible, included in the study, completing follow-up, and analysed            | #6-#8   |
|                          |     | (b) Give reasons for non-participation at each stage                                                                                                                                                         | No      |
|                          |     | (c) Consider use of a flow diagram                                                                                                                                                                           | No      |
| Descriptive data         | 14* | (a) Give characteristics of study participants (eg demographic, clinical, social) and information on exposures and potential confounders                                                                     | #8-#10  |
|                          |     | (b) Indicate number of participants with missing data for each variable of interest                                                                                                                          | NA      |
| Outcome data             | 15* | Report numbers of outcome events or summary measures                                                                                                                                                         | #9-#10  |
| Main results             | 16  | (a) Give unadjusted estimates and, if applicable, confounder-adjusted estimates and their precision (eg, 95% confidence interval). Make clear which confounders were adjusted for and why they were included | #8      |
|                          |     | (b) Report category boundaries when continuous variables were categorized                                                                                                                                    | #9-#10  |
|                          |     | (c) If relevant, consider translating estimates of relative risk into absolute risk for a meaningful time period                                                                                             | NA      |
| Other analyses           | 17  | Report other analyses done—eg analyses of subgroups and interactions, and sensitivity analyses                                                                                                               | #9-#10  |
| <b>Discussion</b>        |     |                                                                                                                                                                                                              |         |
| Key results              | 18  | Summarise key results with reference to study objectives                                                                                                                                                     | #11     |
| Limitations              | 19  | Discuss limitations of the study, taking into account sources of potential bias or imprecision. Discuss both direction and magnitude of any potential bias                                                   | #11-#12 |
| Interpretation           | 20  | Give a cautious overall interpretation of results considering objectives, limitations, multiplicity of analyses, results from similar studies, and other relevant evidence                                   | #12     |
| Generalisability         | 21  | Discuss the generalisability (external validity) of the study results                                                                                                                                        | #12     |
| <b>Other information</b> |     |                                                                                                                                                                                                              |         |
| Funding                  | 22  | Give the source of funding and the role of the funders for the present study and, if applicable, for the original study on which the present article is based                                                | #13     |

1  
2  
3 \*Give information separately for cases and controls in case-control studies and, if applicable, for  
4 exposed and unexposed groups in cohort and cross-sectional studies.  
5  
6

7 **Note:** An Explanation and Elaboration article discusses each checklist item and gives methodological  
8 background and published examples of transparent reporting. The STROBE checklist is best used in  
9 conjunction with this article (freely available on the Web sites of PLoS Medicine at  
10 <http://www.plosmedicine.org/>, Annals of Internal Medicine at <http://www.annals.org/>, and  
11 Epidemiology at <http://www.epidem.com/>). Information on the STROBE Initiative is available at  
12 [www.strobe-statement.org](http://www.strobe-statement.org).  
13  
14  
15  
16  
17  
18  
19  
20  
21  
22  
23  
24  
25  
26  
27  
28  
29  
30  
31  
32  
33  
34  
35  
36  
37  
38  
39  
40  
41  
42  
43  
44  
45  
46  
47  
48  
49  
50  
51  
52  
53  
54  
55  
56  
57  
58  
59  
60

# BMJ Open

## Job burnout among critical care nurses from 14 adult ICUs in northeastern China: a cross-sectional survey

|                                 |                                                                                                                                                                                                       |
|---------------------------------|-------------------------------------------------------------------------------------------------------------------------------------------------------------------------------------------------------|
| Journal:                        | <i>BMJ Open</i>                                                                                                                                                                                       |
| Manuscript ID:                  | bmjopen-2014-004813.R1                                                                                                                                                                                |
| Article Type:                   | Research                                                                                                                                                                                              |
| Date Submitted by the Author:   | 21-May-2014                                                                                                                                                                                           |
| Complete List of Authors:       | Zhang, Xiao-Chun; The First Affiliated Hospital, China Medical University, Cardiology<br>Huang, De-Sheng; China Medical University, Mathematics<br>Guan, Peng; China Medical University, Epidemiology |
| <b>Primary Subject Heading</b>: | Epidemiology                                                                                                                                                                                          |
| Secondary Subject Heading:      | Nursing                                                                                                                                                                                               |
| Keywords:                       | Burnout, Intensive Care Units, nurses                                                                                                                                                                 |
|                                 |                                                                                                                                                                                                       |

SCHOLARONE™  
Manuscripts

1 **Job burnout among critical care nurses from 14 adult ICUs in northeastern China: a**  
2 **cross-sectional survey**

3 Xiao-Chun Zhang<sup>1</sup>, De-Sheng Huang<sup>2</sup>, Peng Guan<sup>3</sup>

4 <sup>1</sup> Cardiac Critical Care Unit, Department of Cardiology, The First Affiliated Hospital, China Medical  
5 University, Shenyang 110001, China.

6 <sup>2</sup> Department of Mathematics, College of Basic Medical Sciences, China Medical University,  
7 Shenyang 110001, China.

8 <sup>3</sup> Department of Epidemiology, School of Public Health, China Medical University, Shenyang  
9 110001, China.

10

11 **§Corresponding author:** Peng Guan, Department of Epidemiology, School of Public Health,  
12 China Medical University, Shenyang 110001, China; Phone:+86-24-23256666 ext. 5401; Fax: +86-  
13 24-23258982; E-mail: pguan@mail.cmu.edu.cn

14

15 **Key words:** Burnout, Intensive Care Units, nurses

16 **Word count (main text):** 2670 words

1  
2  
3  
4  
5  
6  
7  
8  
9  
10  
11  
12  
13  
14  
15  
16  
17  
18  
19  
20  
21  
22  
23  
24  
25  
26  
27  
28  
29  
30  
31  
32  
33  
34  
35  
36  
37  
38  
39  
40  
41  
42  
43  
44  
45  
46  
47  
48  
49  
50  
51  
52  
53  
54  
55  
56  
57  
58  
59  
60

## 1 ABSTRACT

2 **Objectives** The shortage of qualified nurses is one of the critical challenges in the field of  
3 healthcare. Among the contributing factors, job burnout has been indicated as a risk factor of the  
4 intention to leave. The purpose of this study was to provide a better understanding of the local  
5 status and reference data for coping strategies of ICU nurse burnout among Liaoning ICU Nurses.

6 **Design** Observational study.

7 **Setting** Seventeen ICUs from 10 tertiary level hospitals in Liaoning, China.

8 **Participants** Four hundred and thirty-one ICU nurses from 14 ICUs nested in 10 tertiary level  
9 hospitals in Liaoning, China were invited during October and November 2010.

10 **Primary measures** Burnout was measured with the 22-item Chinese version of Maslach Burnout  
11 Inventory-Health Service Survey (MBI-HSS) questionnaires.

12 **Results** Fourteen ICUs responded actively and were included, the response rate was 98.8%  
13 among the 431 invited participants from these 14 ICUs. The study population was a young  
14 population, with the median age 25 years old, interquartile range 19 to 52 years old and female  
15 nurses accounted the major part (88.5%). Sixty-eight nurses (16.0%) were found to have a high  
16 degree of burnout, earning high emotional exhaustion and depersonalization scores together with a  
17 low personal accomplishment score.

18 **Conclusions** The present study indicated the moderate distribution of burnout among ICU nurses  
19 in Liaoning, China. The investigation into the burnout level of this population could catch more  
20 attention to ICU caregivers.

21

## Strengths and limitations of this study

- This is the first study to state the actual, overall situation regarding burnout status among ICU nurses in Liaoning, China, to the best of the authors' knowledge.
- This multi-center 'Study to Understand Burnout among Liaoning ICU Nurses' revealed that as many as 16% of the ICU nursing team showed a high level of burnout in all emotional exhaustion (EE), depersonalization (DP) and personal accomplishment (PA) dimensions.
- There may have been important differences of various clinical settings, for example, work climate, the characteristics of the patients, work load, relationship between doctors and nurses, institutional policy, coping strategies and etc, the results are not generalizable to all Chinese ICU nurses as a whole.
- The researcher in each participating ICU was the ICU head nurse, and to some extent, the firsthand acquaintance might affect the information those nurses provided.

## 1 INTRODUCTION

2 Around the world, the shortage of qualified nurses is one of the critical challenges in the field of  
3 healthcare.[1-3] This shortage is a multidimensional phenomenon,[4,5] and can be attributed to low  
4 job satisfaction, lack of managerial support, poor career opportunities and etc.[6,7] Among the  
5 contributing factors, job burnout has been indicated as a risk factor of the intention to leave.

6 According to the nature, nursing is a stressful occupation due to the direct exposure to various  
7 kinds of working environments and conditions which include anxiety and depression. In China, the  
8 Chinese public is greatly dissatisfied with the high cost and low quality of health care.[8-11]

9 The study communities, Intensive Care Units (ICU) nurses were selected for three main reasons.  
10 First, as just described, with the background of China public's dissatisfaction and the high costs of  
11 intensive care, there is tense relationship between doctors and patients, an online survey revealed  
12 that 66% of 14,577 doctors said that their hospitals encountered one to three medical disputes per  
13 month.[10] More efforts have been made to improve quality of life for patients, while the care  
14 providers deserve equal attention. Second, noises, light and the radiation from those monitoring  
15 equipment that run all day long pose direct impact to the ICU nurses. Third, critical care medicine  
16 was accredited as an independent subspecialty of clinical medicine by Ministry of Health of the  
17 People's Republic of China just in January 2009. Critical care courses and educational programs  
18 taught at hospitals and universities with various kinds of duration and clinical practice are  
19 established to meet the crying need of training during the infancy stage of critical care research in  
20 mainland China.[12] Those in-service ICU nurses are the main part of supporting faculty for those  
21 training. Clear picture about the burnout status can provide some background information for the  
22 target solutions.

23 To provide a better understanding of the local status and reference data for coping strategies of  
24 ICU nurse burnout, the present cross-sectional study, 'Study to Understand Burnout among  
25 Liaoning ICU Nurses (the SUBLIN study)', was conducted to report findings.

## 26 METHODS

### 27 Study units and subjects



1 A cross-sectional survey was conducted during October and November 2010 in Liaoning province,  
2 northeastern China. The ICU nurses that work in the 17 intensive care units from 10 tertiary level  
3 hospitals were selected as the target population. The principal investigator and co-principal  
4 investigators contacted the head nurse of each participating ICUs via meeting or telephone to  
5 share the project objectives and collect the feedback on the questionnaire to be used. After the  
6 questionnaire approved by the project core team member and the head nurses of included ICUs,  
7 those head nurses assisted in contacting the nurse staff in first-line clinical positions who agreed to  
8 participate and arranging the schedule that the nurse could be available. The self-administered  
9 anonymous questionnaire addressed demographic data and burnout was adopted during the  
10 interview. Demographic information included age, gender, education level, marital status,  
11 professional title, the entire period of employment as a nurse and an ICU nurse. All the ICU nurses  
12 were in a sufficiently good physical and mental condition to provide reliable answers. The  
13 procedures were in accordance with the Declaration of Helsinki and the study was approved by the  
14 Ethical Committee of China Medical University. And to remove the participants' worries about that  
15 the handwriting on the anonymous questionnaires could be possibly tracked according to their  
16 signatures on the consent letter, all the participants provided oral informed consent only. After the  
17 head nurse informed the eligible participants about the survey, the head nurse in each ICU also  
18 explained that the participation was purely voluntary and the results that based on the collected  
19 questionnaire data would be published or presented in an academic symposium on ICU nursing.  
20 The head nurse designated at least 2 people to collect the completed questionnaires and check  
21 the integrity. The participating nurses were asked to finish the questionnaire within 5 days and they  
22 could complete the questionnaire either at home or on the working place.

23 The study population was a dynamic population, some events, such as sick leave, maternity leave  
24 or duty travel happened occasionally or frequently. After the negotiation between the principal  
25 investigator and the head nurse of each participating ICU, the survey schedule was fixed, and the  
26 available nurse participants were defined by the head nurse of each ICU.

## 27 **Measurement of burnout**

1 Burnout was measured with the self-reporting Chinese version of anonymous Maslach Burnout  
2 Inventory-Human Services Survey (MBI-HSS) questionnaires. Maslach Burnout Inventory-Human  
3 Services Survey version was It consists of three dimensions: emotional exhaustion (EE),  
4 depersonalization (DP) and personal accomplishment (PA). The items in the emotional exhaustion  
5 subscale describe the feelings of being emotionally overextended and exhausted by one's work,  
6 the items in the Depersonalization subscale describe an unfeeling and impersonal response  
7 towards recipients of one's care or service, and the items in the personal accomplishment subscale  
8 describe feelings of competence and successful achievement in one's work with people.[13] The  
9 Maslach Burnout Inventory-Human Services Survey was translated into Chinese by Samantha  
10 Mei-Che Peng from The Hong Kong Polytechnic University, its Cronbach's  $\alpha = 0.73$  for the whole  
11 questionnaire, 0.86, 0.76 and 0.76 for the three subscales.[14] The total scale consists of 22 items,  
12 among which the EE dimension is measured by nine items, the DP dimension is measured by five  
13 items, and the measurement of PE dimension is based on eight items. Each of the items is scored  
14 on a Likert scale from 0 to 6. The score are defined according to how often the statement is  
15 experienced, from 'never' (0) to 'every day'(6). Higher scores on the EE and DP dimensions and  
16 lower scores on the PA dimension indicate higher level of burnout. It has been indicated that cut-off  
17 points should be nation-specific and clinically derived to respond to cultural values, traditional  
18 gender roles and others.[15] Cut-off criteria of the MBI-HSS-C in the present study was discussed  
19 and determined by the project core team member, EE:low, less than 19, moderate, 19-26, high  
20 more than 26, DP: low: less than 6, moderate, 6-9, high, more than 9, and PA: low, more than 39,  
21 moderate 34-39, high, less than 34.[16] Given the fact that the definition of burnout is still  
22 controversial, in the present study those individuals that with high EE scores and DP scores  
23 together with a low PA score were identified as having a high degree of burnout,[13] and the  
24 distribution data in each subscale was also provided.

### 25 **Statistical analysis**

26 In China, most of the nurses are females, male nurses, as the minority part, may stay at different  
27 level of job burnout when being compared with the counterpart female nurses. Thus, the subgroup  
28 analysis was conducted to test the differences between male nurses and females. There is

1 increasing emphasis on higher entrance requirements of ICU nurses, and the amount of nurses'  
2 salary are closely related to the job rank. And the job rank of the nurses highly rely on the  
3 education level, the length of service, the quantity and quality of scientific output, for example, the  
4 number of first-authored publications, thus the education level, job rank, years of employment as a  
5 registered nurse, and years of employment as an ICU nurse were considered for subgroup  
6 analysis. Age group was classified as <30, 30 to 40 and >40 years. Years of experience as a  
7 registered nurse was grouped as <5, 5-10, 11-19 and more than 20 years. Around 30% of the  
8 study population held a junior college diploma and 45% of the study population graduated from  
9 secondary nursing school when they was first employed as a nurse, part of the nurses attended  
10 part-time courses to gain a higher degree. Detailed questions on education level could disclose too  
11 much personal information, so only the highest level of education was collected in the present  
12 survey to confirm the survey was anonymous. The marital status may also have an impact on the  
13 level of burnout, stratified analysis on marital status was conducted. Differences of MBI scores for  
14 demographics and years of experience as a registered nurse or an ICU nurse were tested by the  
15 Student t-test and ANOVA. For ordinal data, Mann-Whitney U test was adopted for comparison  
16 between two groups and the Kruskal-Wallis test for comparison between more than two groups.  
17 The proportion of the nurses having a high degree of burnout in each subgroup was tested by Chi-  
18 square test. The Student t-test, ANOVA, Mann-Whitney U test and Kruskal-Wallis test were done  
19 using SPSS software (SPSS 12.0 for windows, SPSS Inc., Chicago, IL, USA). The Chi-square test  
20 was performed with the software Epi Info™ 3.4.3 (Version 3.4.3 Centers for Disease Control and  
21 Prevention, Atlanta, GA, USA). All the P values were two-sided with the P-value less than 0.05  
22 considered as statistically significant.

## 23 RESULTS

24 Among the invited 17 ICUs, 14 ICUs from 10 tertiary level hospitals responded actively and were  
25 included in the present study (Figure 1). For those uninvolved 3 ICUs, one ICU was at the  
26 rearrangement stage due to the decoration during the study period, one ICU was at the beginning  
27 stage of being short of ICU nurses, and one ICU was open-type ICU that the management mode  
28 was distinct from the other ICUs. All the included ICUs were closed-type ICU with the available 24-

1 hour a day presence of junior or intermediate intensivist, and all the nurses' working-shift was 12-  
2 hour shift. The characteristics of the 14 included ICUs are shown in Table 1. For the 10 hospitals,  
3 half were university and university affiliated hospitals, 3 hospitals with more than 2,000 beds and  
4 the biggest one with 4,300 beds. The number of admissions in each included ICUs varied from 120  
5 to 890 per year.

6 Figure 1 here

7 **Figure 1 Framework of Study to Understand Burnout among Liaoning ICU Nurses, the**  
8 **SUBLIN study**

1 **Table 1 Characteristics of 14 included Intensive Care Units in Liaoning province, China, the**

2 **SUBLIN study**

3

| Characteristics                             | Number (% or interquartile)                                                         |
|---------------------------------------------|-------------------------------------------------------------------------------------|
| Type of hospital                            |                                                                                     |
| University and University affiliated        | 5 (50%)                                                                             |
| Public                                      | 5 (50%)                                                                             |
| Number of Hospital beds (in 2009)           |                                                                                     |
| ≥ 1000                                      | 5 (50%, )                                                                           |
| < 1000                                      | 5 (50%)                                                                             |
| ICU treatment provision by patient category |                                                                                     |
| Medical                                     | 10 (71.4%)                                                                          |
| Surgical                                    | 4 (28.6%)                                                                           |
| Number of ICU beds                          | Median: 12<br>Interval: 6-28<br>Interquartile interval: 9-15                        |
| Number of ICU admissions per year           | Median: 300<br>Interval: 120-890<br>Interquartile interval: 165-600                 |
| ICU mortality in 2009 (%)                   | Median: 14.3%<br>Interval: 4.5%-21.0%<br>Interquartile interval: 9.2%-16.7%         |
| Average ICU length of stay (days)           | Median: 6.3<br>Interval: 3-30<br>Interquartile interval: 4.5-12.3                   |
| Number of ICU nurses                        | Median: 26<br>Interval: 10-76<br>Interquartile interval: 19-35                      |
| Patient-to-nurse ratio                      | Median: 2.2:1<br>Interval: 2.9:1 to 1.3:1<br>Interquartile interval: 2.5:1 to 1.9:1 |

4

5

6

7

8

9

10

11

12

13

14

15

16

17

18

19

20

21

22

23

24

1 After the introduction of the study objectives provided for 431 participants, five nurses finally  
2 refused to join and 426 copies of complete questionnaires were returned, resulting in the response  
3 rate was 98.8%. The study population was a young population, with the median age 25 years old,  
4 interquartile range 19 to 52 years old and female nurses accounted the major part (88.5%). Sixty-  
5 eight nurses (16.0%) were found to have a high degree of burnout, earning high EE and DP scores  
6 together with a low PA score. The proportion difference with statistical significance was only found  
7 in the group defined according to the years of experience as a registered nurse. About one quarter  
8 of those nurses that had been working as a registered nurse for 5 to 10 years had a high degree of  
9 burnout (Table 2).

10 When evaluated in each EE, DP and PA subscale, 184, 111 and 177 nurses stayed at the high  
11 level of burnout, respectively. Thus the most pronounced symptoms of burnout were emotional  
12 exhaustion and personal accomplishment. Among all the studied variables, the statistical  
13 significance was found for the DP scores among the nurses that with different education level,  
14 nurses that hold a junior college diploma were with a higher DP score when compared with the  
15 other two counterparts (Table 2).

**Table 2 Sociodemographic characteristics of the ICU nurses in Liaoning province, China, the SUBLIN study**

| Variables                                                                                  | Number (%)   | Number of nurses having a high degree of burnout | EE          |     |          | DP   |           |     | PA       |      |             |     |          |      |
|--------------------------------------------------------------------------------------------|--------------|--------------------------------------------------|-------------|-----|----------|------|-----------|-----|----------|------|-------------|-----|----------|------|
|                                                                                            |              |                                                  | Mean±SD     | Low | Moderate | High | Mean      | Low | Moderate | High | Mean        | Low | Moderate | High |
|                                                                                            |              | 68                                               | 24.55±12.36 | 149 | 93       | 184  | 7.05±6.50 | 214 | 101      | 111  | 35.08±9.36  | 154 | 95       | 177  |
| <b>Gender</b>                                                                              |              |                                                  |             |     |          |      |           |     |          |      |             |     |          |      |
| Female                                                                                     | 377 (88.5%)  | 59                                               | 24.49±12.58 | 136 | 80       | 161  | 6.97±6.55 | 194 | 86       | 97   | 35.14±9.62  | 143 | 79       | 155  |
| Male                                                                                       | 49 (11.5%)   | 9                                                | 25.06±4.53  | 13  | 13       | 23   | 7.65±6.18 | 20  | 15       | 14   | 34.69±7.12  | 11  | 16       | 22   |
| <i>P</i> value                                                                             |              | 0.63                                             | 0.73        |     | 0.32     |      | 0.49      |     | 0.25     |      | 0.70        |     | 0.16     |      |
| <b>Age</b> (years, Median, 25 yrs; interval, 19-52 yrs; interquartile interval, 23-28 yrs) |              |                                                  |             |     |          |      |           |     |          |      |             |     |          |      |
| <30                                                                                        | 357 (83.8%)  | 56                                               | 24.61±12.29 | 123 | 81       | 153  | 7.18±6.45 | 174 | 86       | 97   | 34.91±9.22  | 123 | 84       | 150  |
| 30-40                                                                                      | 62 (14.6%)   | 11                                               | 24.29±12.84 | 24  | 10       | 28   | 6.50±6.76 | 35  | 14       | 13   | 35.79±10.36 | 28  | 9        | 25   |
| >40                                                                                        | 7 (1.6%)     | 1                                                | 24.14±13.50 | 2   | 2        | 3    | 5.14±5.90 | 5   | 1        | 1    | 37.71±7.68  | 3   | 2        | 2    |
| <i>P</i> value                                                                             |              | 0.91                                             | 0.98        |     | 0.98     |      | 0.55      |     | 0.27     |      | 0.60        |     | 0.51     |      |
| <b>Highest level of nurse education</b>                                                    |              |                                                  |             |     |          |      |           |     |          |      |             |     |          |      |
| Secondary nursing school                                                                   | 57 (13.4 %)  | 7                                                | 24.98±12.98 | 19  | 13       | 25   | 6.49±5.90 | 29  | 15       | 13   | 34.00±10.02 | 17  | 12       | 28   |
| Junior college                                                                             | 219 (51.4 %) | 40                                               | 25.04±12.05 | 73  | 47       | 99   | 7.81±6.90 | 101 | 54       | 64   | 34.68±8.97  | 71  | 56       | 92   |
| Bachelor and Master                                                                        | 150 (35.2%)  | 21                                               | 23.68±12.61 | 57  | 33       | 60   | 6.15±6.00 | 84  | 32       | 34   | 36.08±9.64  | 66  | 27       | 57   |
| <i>P</i> value                                                                             |              | 0.39                                             | 0.56        |     | 0.47     |      | 0.04      |     | 0.15     |      | 0.24        |     | 0.10     |      |
| <b>Job rank</b>                                                                            |              |                                                  |             |     |          |      |           |     |          |      |             |     |          |      |
| Nurse or nurse student                                                                     | 288 (67.6%)  | 40                                               | 24.29±11.97 | 100 | 66       | 122  | 7.01±6.33 | 143 | 73       | 72   | 35.20±8.83  | 104 | 67       | 117  |
| Nurse Practitioner                                                                         | 95 (22.3%)   | 22                                               | 25.51±12.48 | 31  | 23       | 41   | 7.51±7.11 | 47  | 18       | 30   | 34.18±10.04 | 28  | 23       | 44   |
| Nurse-in-charge and higher                                                                 | 43 (10.1%)   | 6                                                | 24.19±14.72 | 18  | 4        | 21   | 6.30±6.32 | 24  | 10       | 9    | 36.30±11.23 | 22  | 5        | 16   |
| <i>P</i> value                                                                             |              | 0.09                                             | 0.70        |     | 0.96     |      | 0.59      |     | 0.59     |      | 0.44        |     | 0.17     |      |
| <b>Marital status</b>                                                                      |              |                                                  |             |     |          |      |           |     |          |      |             |     |          |      |
| Unmarried                                                                                  | 277 (65.0%)  | 38                                               | 24.35±12.48 | 99  | 60       | 118  | 6.96±6.46 | 140 | 68       | 69   | 35.12±9.20  | 99  | 67       | 111  |
| Married                                                                                    | 149          | 30                                               | 24.93±12.17 | 50  | 33       | 66   | 7.21±6.59 | 74  | 33       | 42   | 35.02±9.70  | 55  | 28       | 66   |

|                                                                                                                       |                | (35.0%) |             |      |      |      |           |      |    |    |             |     |    |     |  |
|-----------------------------------------------------------------------------------------------------------------------|----------------|---------|-------------|------|------|------|-----------|------|----|----|-------------|-----|----|-----|--|
| <i>P</i> value                                                                                                        |                | 0.08    | 0.65        | 0.67 | 0.70 | 0.67 | 0.92      | 0.71 |    |    |             |     |    |     |  |
| <b>Years of experience as a registered nurse</b> (Median, 3 yrs; interval, 0-32 yrs; interquartile interval, 3-7 yrs) |                |         |             |      |      |      |           |      |    |    |             |     |    |     |  |
| <5                                                                                                                    | 268<br>(62.9%) | 33      | 23.54±12.10 | 102  | 59   | 107  | 6.90±6.40 | 137  | 66 | 65 | 35.43±9.21  | 99  | 61 | 108 |  |
| 5-10                                                                                                                  | 107<br>(25.1%) | 27      | 27.38±12.33 | 29   | 24   | 54   | 7.99±6.99 | 47   | 23 | 37 | 33.58±8.95  | 30  | 27 | 50  |  |
| 11-19                                                                                                                 | 39<br>(9.2%)   | 6       | 23.87±13.52 | 13   | 8    | 18   | 5.62±5.64 | 23   | 9  | 7  | 36.15±11.22 | 19  | 5  | 15  |  |
| 20 or more                                                                                                            | 12<br>(2.8%)   | 2       | 24.00±12.15 | 5    | 2    | 5    | 6.50±6.36 | 7    | 3  | 2  | 37.33±9.37  | 6   | 2  | 4   |  |
| <i>P</i> value                                                                                                        |                | 0.02    | 0.06        | 0.19 | 0.23 | 0.15 | 0.23      | 0.22 |    |    |             |     |    |     |  |
| <b>Years of experience as an ICU nurse</b> (Median, 2 yrs; interval, 0-20 yrs; interquartile interval, 1-4 yrs)       |                |         |             |      |      |      |           |      |    |    |             |     |    |     |  |
| <5                                                                                                                    | 332<br>(77.9%) | 46      | 23.89±12.07 | 123  | 73   | 136  | 6.84±6.35 | 169  | 82 | 81 | 35.32±9.19  | 121 | 77 | 134 |  |
| 5-10                                                                                                                  | 82<br>(19.2%)  | 20      | 27.38±13.44 | 22   | 18   | 42   | 7.83±7.18 | 40   | 14 | 28 | 33.65±9.92  | 26  | 17 | 39  |  |
| 11-19                                                                                                                 | 10<br>(2.3%)   | 2       | 24.00±11.08 | 3    | 2    | 5    | 7.70±6.15 | 4    | 4  | 2  | 37.20±10.22 | 5   | 1  | 4   |  |
| 20 or more                                                                                                            | 2<br>(0.5%)    | 0       | 21.50±12.02 | 1    | 0    | 1    | 5.50±3.54 | 1    | 1  | 0  | 44.00±4.24  | 2   | 0  | 0   |  |
| <i>P</i> value                                                                                                        |                | 0.11    | 0.15        | 0.29 | 0.63 | 0.76 | 0.22      | 0.23 |    |    |             |     |    |     |  |

SD: Standard deviation. Percentages may not add up to 100% due to rounding.



## 1 DISCUSSION

2 This multi-center study revealed that as many as 16% of the ICU nursing team  
3 showed a high level of burnout in all three dimensions. For each subscale, the  
4 highest proportion of high-degree (43.2%) was found in the emotional exhaustion  
5 subscale, followed by 41.2% in personal accomplishment subscale and 26.1% in  
6 depersonalization subscale. Given the fact that the well-being of the ICU nurses is of  
7 critical importance to the quality of critically ill patients who are likely to benefit from  
8 ICU care, this kind of investigation into the burnout level of this population could  
9 catch more attention to ICU caregivers.

10 In Liaoning, China, there are still no complete epidemiologic data to state the actual,  
11 overall situation regarding burnout status among ICU nurses, to the best of our  
12 knowledge, this is the first burnout study among Liaoning ICU nurses. Most of the  
13 respondents indicated that the investigation from nurses' perspective might  
14 contribute to not only the mutual understanding between nurse leaders, ICU  
15 managers and nurses, but also their greater self-awareness of burnout. This study  
16 strengthened the power of the Critical Care Special Committee nested in Nursing  
17 Association of China Liaoning Branch and added an appeal to the nurse students to  
18 work in ICU. When focusing on the prevalence and the prevention of occupational  
19 burnout in order to develop effective interventions, a few characteristics should be  
20 taken into account. There is a linear relationship between emotional exhaustion and  
21 depersonalization, both subscales, emotional exhaustion and depersonalization can  
22 discriminate between burned out and non-burned out employees.[17] On the other  
23 hand, low levels of personal accomplishment and high degree of depersonalization in  
24 the burnout scores may actually be protective against stress.[18] Moreover, high  
25 levels of emotional exhaustion cause stress and that stress causes high levels of  
26 emotional exhaustion. In addition, depersonalization may reduce stress, whereas  
27 high degrees of personal accomplishment may increase stress levels.[19]

1 The present study has its limitations. Firstly, although the rate of response to the  
2 questionnaire was excellent, five nurses refused to join the study after the  
3 introduction of the study objectives. This refusal might have been related to that they  
4 were already exhausted at that time due to various reasons, such as, heavy work  
5 load. Secondly, the researcher in each participating ICU was the ICU head nurse,  
6 and to some extent, the firsthand acquaintance might affect the information those  
7 nurses provided. We tried to minimize the kind of worry, the anonymous  
8 questionnaire was a structured questionnaire, the participants only needed to put a  
9 tick opposite each choice, the pen they used was also provided by the stationery  
10 office of each hospital. Thus, it was difficult to trace the participant information  
11 according to these tick marks. Thirdly, the number of nurses in each participating  
12 hospital was more than one thousand, the demographic data of total registered  
13 nurses in the hospital was available for 3 hospitals, thus those data for the ICU  
14 nurses from those 3 nested ICUs could be compared to the total registered nurses of  
15 the hospital, and no statistical differences were found. In addition, there may have  
16 been important differences of various clinical settings, for example, work climate, the  
17 characteristics of the patients, work load, relationship between doctors and nurses,  
18 institutional policy, coping strategies and etc, the results are not generalizable to all  
19 Chinese ICU nurses as a whole.

20 This proportion of burnout (16% in all 3 dimensions, and 26.1% to 43.2% in each  
21 single subscale) among Liaoning ICU nurses that experienced a high degree of  
22 burnout is in the range of several recently published studies that reported the  
23 distribution of high-level burnout among ICU nurses, around one-third of the ICU  
24 nurses having a high level of burnout.[20-23] In 2005, a Maslach Burnout Inventory-  
25 General Survey based investigation was conducted in a convenience sample of staff  
26 nurses in Henan province in China, the participants were all females, mean age was  
27 29 years with a range from 18 to 60 years and 66% had experience in nursing for 5

1  
2  
3 1 years or more. They focused on the nurses from provincial hospitals, supported the  
4  
5 2 view that nurses commonly experience burnout and the study reported that scores  
6  
7 3 for burnout of surgical and medical nurses were statistically significantly higher than  
8  
9 4 those of other nurses, lower educational status was associated with higher levels of  
10  
11 5 burnout in young nurses. However, in the present study, the highest proportion of the  
12  
13 6 nurses that experiencing high degree of burnout was found for the nurses with 5 to  
14  
15 7 10 years' employment as a registered nurse. Around 11.5% of the participants in our  
16  
17 8 study were males, and 63% of the included ICU nurses had less than 5 years of  
18  
19 9 employment as a registered nurse. The differences between that study and our study  
20  
21 10 revealed that burnout was associated with demographic characteristics, such as age,  
22  
23 11 educational level, the kind of clinical setting and years of employment as a nurse or  
24  
25 12 an ICU nurse, cautions should be exercised when comparing the results originated  
26  
27 13 from different studies.[24]

28  
29 14 This result might help the ICU head nurse to take some actions to explore the  
30  
31 15 feelings, concerns and difficulties of ICU nurses and explore possible solutions and  
32  
33 16 interventions correspondingly.[25,26] High-risk factors[27] and possible protective  
34  
35 17 factors[28,29] that associated with burnout level in Liaoning ICU nurses, such as  
36  
37 18 work environment, job satisfaction, social support and coping strategies will be  
38  
39 19 explored in the next stage of the SUBLIN study.  
40  
41

42 20

43 21

44 22

45 23

46 24

47 25

48 26

49 27

50 28

51 29

52 30

1  
2  
3 **1 Acknowledgements**  
4

5 2 This project was made possible by the efforts of 14 collaborative ICUs from 10  
6  
7 3 hospitals and by the enthusiastic support and active participation of the nurses.  
8

9  
10 **4 Contributors**

11 5 X CZ conceived of the study, participated in its design and coordination. XZ and PG  
12 6 had full access to all of the data in the study, took responsibility for the integrity of the  
13 7 data and the accuracy of the data analysis and drafted the manuscript. DSH  
14 8 participated in its design, analysis and coordination, and helped to draft the  
15 9 manuscript. All authors reviewed and approved the final manuscript.  
16  
17

18  
19  
20  
21  
22 **10 Funding**  
23

24 11 This work was supported by the Natural Science Foundation of Liaoning Province,  
25 12 China, grant number 201320014. This work was also a part of the programme for  
26 13 Elaborate Course of Epidemiology and Key Disciplines Construction supported by  
27 14 China Medical University, grant number CMU Internal Circular-J-[2010]-16-31 and  
28 15 Internal Circular-F-[2011]-5).  
29  
30  
31  
32  
33  
34

35 **16 Competing interests**  
36

37 17 X CZ conceived of the study, participated in its design and coordination. XZ and PG  
38 18 had full access to all of the data in the study, took responsibility for the integrity of the  
39 19 data and the accuracy of the data analysis and drafted the manuscript. DSH  
40 20 participated in its design, analysis and coordination, and helped to draft the  
41 21 manuscript. All authors reviewed and approved the final manuscript.  
42  
43  
44  
45  
46  
47

48 **22 Data Sharing Statement**  
49

50 23 No additional data available  
51

52 24 Non **Appendix**-Study Team (SUBLIN Study), Chun-Mei Gu, Li-Huan Hu, Hong-Fei Li,  
53 25 Li-Hong Liu, Long-Feng Sun, Xuan Wang, Xiao-Jiang Yu, Jun-Li Zhang, Li-Hong  
54 26 Zhang, Shen-Ping Zhang, Wen-Jing Zhao, Li-Yuan Zheng.  
55  
56  
57  
58  
59  
60

1  
2  
3 **REFERENCES**

- 4  
5 1. Nardi DA, Gyurko CC. The global nursing faculty shortage: status and solutions for  
6  
7 change. *J Nurs Scholarsh* 2013;**45**:317-26.  
8  
9  
10 2. Reinert J, Bigelow A, Kautz DD. Overcoming nursing faculty shortages and  
11  
12 bridging the gap between education and practice. *J Nurses Staff Dev* 2012;**28**:216-  
13  
14 8.  
15  
16 3. Ahmed SM, Hossain MA, Rajachowdhury AM, *et al*. The health workforce crisis in  
17  
18 Bangladesh: shortage, inappropriate skill-mix and inequitable distribution. *Hum*  
19  
20 *Resour Health* 2011;**9**:3.  
21  
22 4. Farsi Z, Dehghan-Nayeri N, Negarandeh R, *et al*. Nursing profession in Iran: an  
23  
24 overview of opportunities and challenges. *Jpn J Nurs Sci* 2010;**7**:9-18.  
25  
26 5. Duvall JJ, Andrews DR. Using a structured review of the literature to identify key  
27  
28 factors associated with the current nursing shortage. *J Prof Nurs* 2010;**26**:309-17.  
29  
30 6. Wynn SD. Addressing the nursing workforce shortage: veterans as mental health  
31  
32 nurses. *J Psychosoc Nurs Ment Health Serv* 2013;**51**:3-4.  
33  
34 7. Chan ZC, Tam WS, Lung MK, *et al*. A systematic literature review of nurse  
35  
36 shortage and the intention to leave. *J Nurs Manag* 2013;**21**:605-13.  
37  
38 8. Hsiao WC. When incentives and professionalism collide. *Health Aff (Millwood)*  
39  
40 2008;**27**:949-51.  
41  
42 9. Ma J, Lu M, Quan H. From a national, centrally planned health system to a system  
43  
44 based on the market: lessons from China. *Health Aff (Millwood)* 2008;**27**:937-48.  
45  
46 10. Yu D, Li T. Facing up to the threat in China. *Lancet* 2010;**376**:1823-4.  
47  
48 11. Wagstaff A, Yip W, Lindelow M, *et al*. China's health system and its reform: a  
49  
50 review of recent studies. *Health Econ* 2009;**18**:S7-23.  
51  
52 12. Du B, Xi X, Chen D, *et al*. Clinical review: critical care medicine in mainland  
53  
54 China. *Crit Care* 2010;**14**:206.  
55  
56  
57  
58  
59  
60

- 1  
2  
3 13. Maslach C, Jackson SE. The measurement of experienced burnout. *J Occup*  
4  
5 2 *Behav* 1981;2:99-113.  
6  
7 14. Ye ZH, Luo H, Jiang HL. Diagnostic standard and norms of Maslach Burnout  
8  
9 4 Inventory for nurses in Hangzhou. *Chinese Journal of Nursing* 2008;43:207-9. (in  
10  
11 5 Chinese)  
12  
13 15. Schaufeli WB, Van Dierendonck D. A cautionary note about the cross-national  
14  
15 7 and clinical validity of cut-off points for the Maslach Burnout Inventory. *Psychol Rep*  
16  
17 8 1995;76:1083-90.  
18  
19 9 16. Wu J, Dai Y, Ning Y, *et al.* Study of the status and correlative factors of job  
20  
21 10 burnout among nurses in Xinjiang. *Journal of Nursing Administration* 2011;11:7-9.  
22  
23 11 (in Chinese)  
24  
25 12 17. Schaufeli WB, Bakker AB, Hoogduin K, *et al.* on the clinical validity of the  
26  
27 13 maslach burnout inventory and the burnout measure. *Psychol Health* 2001;16:565-  
28  
29 14 82.  
30  
31 15 18. Onder C, Basim N. Examination of developmental models of occupational  
32  
33 16 burnout using burnout profiles of nurses. *J Adv Nurs* 2008;64:514-23.  
34  
35 17 19. McManus IC, Winder BC, Gordon D. The causal links between stress and  
36  
37 18 burnout in a longitudinal study of UK doctors. *Lancet* 2002;359:2089-90.  
38  
39 19 20. Teixeira C, Ribeiro O, Fonseca AM, *et al.* Burnout in intensive care units - a  
40  
41 20 consideration of the possible prevalence and frequency of new risk factors: a  
42  
43 21 descriptive correlational multicentre study. *BMC Anesthesiol* 2013;13:38.  
44  
45 22 21. Poncet MC, Toullic P, Papazian L, *et al.* Burnout syndrome in critical care nursing  
46  
47 23 staff. *Am J Respir Crit Care Med* 2007;175:698-704.  
48  
49 24 22. Verdon M, Merlani P, Perneger T, *et al.* Burnout in a surgical ICU team. *Intensive*  
50  
51 25 *Care Med* 2008;34:152-6.  
52  
53  
54  
55  
56  
57  
58  
59  
60

- 1  
2  
3 1 23. Liu K, You LM, Chen SX, *et al.* The relationship between hospital work  
4 environment and nurse outcomes in Guangdong, China: a nurse questionnaire  
5 survey. *J Clin Nurs* 2012;**21**:1476-85.  
6  
7  
8  
9 24. Wu S, Zhu W, Wang Z, *et al.* Relationship between burnout and occupational  
10 stress among nurses in China. *J Adv Nurs* 2007;**59**:233-9.  
11  
12  
13 25. Yao Y, Yao W, Wang W, *et al.* Investigation of risk factors of psychological  
14 acceptance and burnout syndrome among nurses in China. *Int J Nurs Pract*  
15 2013;**19**:530-8.  
16  
17  
18  
19 26. Lei W, Youn Hee K, Dong W. A review of research and strategies for burnout  
20 among Chinese nurses. *Br J Nurs* 2010;**19**:844-50.  
21  
22  
23 27. Karanikola MN, Papathanassoglou ED, Mpouzika M, *et al.* Burnout syndrome  
24 indices in Greek intensive care nursing personnel. *Dimens Crit Care Nurs*  
25 2012;**31**:94-101.  
26  
27  
28  
29 30 28. Quenot JP, Rigaud JP, Prin S, *et al.* Suffering among carers working in critical  
31 care can be reduced by an intensive communication strategy on end-of-life  
32 practices. *Intensive Care Med* 2012;**38**:55-61.  
33  
34  
35  
36 37 29. Beanland C. Tackling the workforce shortage. *Aust Nurs J* 2013;**20**:47-8.  
38  
39  
40  
41  
42  
43  
44  
45  
46  
47  
48  
49  
50  
51  
52  
53  
54  
55  
56  
57  
58  
59  
60

1 **Job burnout among critical care nurses from 14 adult ICUs in northeastern China: a**  
2 **cross-sectional survey**

3 Xiao-Chun Zhang<sup>1</sup>, De-Sheng Huang<sup>2</sup>, Peng Guan<sup>3</sup>

4 <sup>1</sup> Cardiac Critical Care Unit, Department of Cardiology, The First Affiliated Hospital, China Medical  
5 University, Shenyang 110001, China.

6 <sup>2</sup> Department of Mathematics, College of Basic Medical Sciences, China Medical University,  
7 Shenyang 110001, China.

8 <sup>3</sup> Department of Epidemiology, School of Public Health, China Medical University, Shenyang  
9 110001, China.

10

11 **§Corresponding author:** Peng Guan, Department of Epidemiology, School of Public Health,  
12 China Medical University, Shenyang 110001, China; Phone:+86-24-23256666 ext. 5401; Fax: +86-  
13 24-23258982; E-mail: pguan@mail.cmu.edu.cn

14

15 **Key words:** Burnout, Intensive Care Units, nurses

16 **Word count (main text):** 2670 words



1  
2  
3  
4  
5  
6  
7  
8  
9  
10  
11  
12  
13  
14  
15  
16  
17  
18  
19  
20  
21  
22  
23  
24  
25  
26  
27  
28  
29  
30  
31  
32  
33  
34  
35  
36  
37  
38  
39  
40  
41  
42  
43  
44  
45  
46  
47  
48  
49  
50  
51  
52  
53  
54  
55  
56  
57  
58  
59  
60

1 **ABSTRACT**

2 **Objectives** The shortage of qualified nurses is one of the critical challenges in the field of  
3 healthcare. Among the contributing factors, job burnout has been indicated as a risk factor of the  
4 intention to leave. The purpose of this study was to provide a better understanding of the local  
5 status and reference data for coping strategies of ICU nurse burnout among Liaoning ICU Nurses.

6 **Design** Observational study.

7 **Setting** Seventeen ICUs from 10 tertiary level hospitals in Liaoning, China.

8 **Participants** Four hundred and thirty-one ICU nurses from 14 ICUs nested in 10 tertiary level  
9 hospitals in Liaoning, China were invited during October and November 2010.

10 **Primary measures** Burnout was measured with the 22-item Chinese version of Maslach Burnout  
11 Inventory-Health Service Survey (MBI-HSS) questionnaires.

12 **Results** Fourteen ICUs responded actively and were included, the response rate was 98.8%  
13 among the 431 invited participants from these 14 ICUs. The study population was a young  
14 population, with the median age 25 years old, interquartile range 19 to 52 years old and female  
15 nurses accounted the major part (88.5%). Sixty-eight nurses (16.0%) were found to have a high  
16 degree of burnout, earning high emotional exhaustion and depersonalization scores together with a  
17 low personal accomplishment score.

18 **Conclusions** The present study indicated the moderate distribution of burnout among ICU nurses  
19 in Liaoning, China. The investigation into the burnout level of this population could catch more  
20 attention to ICU caregivers.

## Strengths and limitations of this study

- This is the first study to state the actual, overall situation regarding burnout status among ICU nurses in Liaoning, China, to the best of the authors' knowledge.
- This multi-center 'Study to Understand Burnout among Liaoning ICU Nurses' revealed that as many as 16% of the ICU nursing team showed a high level of burnout in all emotional exhaustion (EE), depersonalization (DP) and personal accomplishment (PA) dimensions.
- There may have been important differences of various clinical settings, for example, work climate, the characteristics of the patients, work load, relationship between doctors and nurses, institutional policy, coping strategies and etc, the results are not generalizable to all Chinese ICU nurses as a whole.
- The researcher in each participating ICU was the ICU head nurse, and to some extent, the firsthand acquaintance might affect the information those nurses provided.

## 1 INTRODUCTION

2 Around the world, the shortage of qualified nurses is one of the critical challenges in the field of  
3 healthcare.[1-3] This shortage is a multidimensional phenomenon,[4,5] and can be attributed to low  
4 job satisfaction, lack of managerial support, poor career opportunities and etc.[6,7] Among the  
5 contributing factors, job burnout has been indicated as a risk factor of the intention to leave.

6 According to the nature, nursing is a stressful occupation due to the direct exposure to various  
7 kinds of working environments and conditions which include anxiety and depression. In China, the  
8 Chinese public is greatly dissatisfied with the high cost and low quality of health care.[8-11]

9 The study communities, Intensive Care Units (ICU) nurses were selected for three main reasons.  
10 First, as just described, with the background of China public's dissatisfaction and the high costs of  
11 intensive care, [there is tense relationship between doctors and patients, an online survey revealed](#)  
12 [that 66% of 14,577 doctors said that their hospitals encountered one to three medical disputes per](#)  
13 [month.\[10\]](#) More efforts have been made to improve quality of life for patients, while the care  
14 providers deserve equal attention. Second, noises, light and the radiation from those monitoring  
15 equipment that run all day long pose direct impact to the ICU nurses. Third, critical care medicine  
16 was accredited as an independent subspecialty of clinical medicine by Ministry of Health of the  
17 People's Republic of China just in January 2009. Critical care courses and educational programs  
18 taught at hospitals and universities with various kinds of duration and clinical practice are  
19 established to meet the crying need of training during the infancy stage of critical care research in  
20 mainland China.[12] Those in-service ICU nurses are the main part of supporting faculty for those  
21 training. Clear picture about the burnout status can provide some background information for the  
22 target solutions.

23 To provide a better understanding of the local status and reference data for coping strategies of  
24 ICU nurse burnout, the present cross-sectional study, 'Study to Understand Burnout among  
25 Liaoning ICU Nurses (the SUBLIN study)', was conducted to report findings.

## 26 METHODS

### 27 Study units and subjects

1 A cross-sectional survey was conducted during October and November 2010 in Liaoning province,  
2 northeastern China. The ICU nurses that work in the 17 intensive care units from 10 tertiary level  
3 hospitals were selected as the target population. The principal investigator and co-principal  
4 investigators contacted the head nurse of each participating ICUs via meeting or telephone to  
5 share the project objectives and collect the feedback on the questionnaire to be used. After the  
6 questionnaire approved by the project core team member and the head nurses of included ICUs,  
7 those head nurses assisted in contacting the nurse staff in first-line clinical positions who agreed to  
8 participate and arranging the schedule that the nurse could be available. The self-administered  
9 anonymous questionnaire addressed demographic data and burnout was adopted during the  
10 interview. Demographic information included age, gender, education level, marital status,  
11 professional title, the entire period of employment as a nurse and an ICU nurse. All the ICU nurses  
12 were in a sufficiently good physical and mental condition to provide reliable answers. The  
13 procedures were in accordance with the Declaration of Helsinki and the study was approved by the  
14 Ethical Committee of China Medical University. And to remove the participants' worries about that  
15 the handwriting on the anonymous questionnaires could be possibly tracked according to their  
16 signatures on the consent letter, all the participants provided oral informed consent only. After the  
17 head nurse informed the eligible participants about the survey, the head nurse in each ICU also  
18 explained that the participation was purely voluntary and the results that based on the collected  
19 questionnaire data would be published or presented in an academic symposium on ICU nursing.  
20 The head nurse designated at least 2 people to collect the completed questionnaires and check  
21 the integrity. The participating nurses were asked to finish the questionnaire within 5 days and they  
22 could complete the questionnaire either at home or on the working place.

23 The study population was a dynamic population, some events, such as sick leave, maternity leave  
24 or duty travel happened occasionally or frequently. After the negotiation between the principal  
25 investigator and the head nurse of each participating ICU, the survey schedule was fixed, and the  
26 available nurse participants were defined by the head nurse of each ICU.

## 27 **Measurement of burnout**

1 Burnout was measured with the self-reporting Chinese version of anonymous Maslach Burnout  
2 Inventory-Human Services Survey (MBI-HSS) questionnaires. Maslach Burnout Inventory-Human  
3 Services Survey version was It consists of three dimensions: emotional exhaustion (EE),  
4 depersonalization (DP) and personal accomplishment (PA). The items in the emotional exhaustion  
5 subscale describe the feelings of being emotionally overextended and exhausted by one's work,  
6 the items in the Depersonalization subscale describe an unfeeling and impersonal response  
7 towards recipients of one's care or service, and the items in the personal accomplishment subscale  
8 describe feelings of competence and successful achievement in one's work with people.[13] The  
9 Maslach Burnout Inventory-Human Services Survey was translated into Chinese by Samantha  
10 Mei-Che Peng from The Hong Kong Polytechnic University, its Cronbach's  $\alpha = 0.73$  for the whole  
11 questionnaire, 0.86, 0.76 and 0.76 for the three subscales.[14] The total scale consists of 22 items,  
12 among which the EE dimension is measured by nine items, the DP dimension is measured by five  
13 items, and the measurement of PE dimension is based on eight items. Each of the items is scored  
14 on a Likert scale from 0 to 6. The score are defined according to how often the statement is  
15 experienced, from 'never' (0) to 'every day'(6). Higher scores on the EE and DP dimensions and  
16 lower scores on the PA dimension indicate higher level of burnout. It has been indicated that cut-off  
17 points should be nation-specific and clinically derived to respond to cultural values, traditional  
18 gender roles and others.[15] Cut-off criteria of the MBI-HSS-C in the present study was discussed  
19 and determined by the project core team member, EE:low, less than 19, moderate, 19-26, high  
20 more than 26, DP: low: less than 6, moderate, 6-9, high, more than 9, and PA: low, more than 39,  
21 moderate 34-39, high, less than 34.[16] Given the fact that the definition of burnout is still  
22 controversial, in the present study those individuals that with high EE scores and DP scores  
23 together with a low PA score were identified as having a high degree of burnout,[13] and the  
24 distribution data in each subscale was also provided.

### 25 **Statistical analysis**

26 In China, most of the nurses are females, male nurses, as the minority part, may stay at different  
27 level of job burnout when being compared with the counterpart female nurses. Thus, the subgroup  
28 analysis was conducted to test the differences between male nurses and females. There is

1 increasing emphasis on higher entrance requirements of ICU nurses, and the amount of nurses'  
2 salary are closely related to the job rank. And the job rank of the nurses highly rely on the  
3 education level, the length of service, the quantity and quality of scientific output, for example, the  
4 number of first-authored publications, thus the education level, job rank, years of employment as a  
5 registered nurse, and years of employment as an ICU nurse were considered for subgroup  
6 analysis. Age group was classified as <30, 30 to 40 and >40 years. Years of experience as a  
7 registered nurse was grouped as <5, 5-10, 11-19 and more than 20 years. Around 30% of the  
8 study population held a junior college diploma and 45% of the study population graduated from  
9 secondary nursing school when they was first employed as a nurse, part of the nurses attended  
10 part-time courses to gain a higher degree. Detailed questions on education level could disclose too  
11 much personal information, so only the highest level of education was collected in the present  
12 survey to confirm the survey was anonymous. The marital status may also have an impact on the  
13 level of burnout, stratified analysis on marital status was conducted. Differences of MBI scores for  
14 demographics and years of experience as a registered nurse or an ICU nurse were tested by the  
15 Student t-test and ANOVA. For ordinal data, Mann-Whitney U test was adopted for comparison  
16 between two groups and the Kruskal-Wallis test for comparison between more than two groups.  
17 The proportion of the nurses having a high degree of burnout in each subgroup was tested by Chi-  
18 square test. The Student t-test, ANOVA, Mann-Whitney U test and Kruskal-Wallis test were done  
19 using SPSS software (SPSS 12.0 for windows, SPSS Inc., Chicago, IL, USA). The Chi-square test  
20 was performed with the software Epi Info™ 3.4.3 (Version 3.4.3 Centers for Disease Control and  
21 Prevention, Atlanta, GA, USA). All the P values were two-sided with the P-value less than 0.05  
22 considered as statistically significant.

## 23 RESULTS

24 Among the invited 17 ICUs, 14 ICUs from 10 tertiary level hospitals responded actively and were  
25 included in the present study (Figure 1). For those uninvolved 3 ICUs, one ICU was at the  
26 rearrangement stage due to the decoration during the study period, one ICU was at the beginning  
27 stage of being short of ICU nurses, and one ICU was open-type ICU that the management mode  
28 was distinct from the other ICUs. All the included ICUs were closed-type ICU with the available 24-

1 hour a day presence of junior or intermediate intensivist, and all the nurses' working-shift was 12-  
2 hour shift. The characteristics of the 14 included ICUs are shown in Table 1. For the 10 hospitals,  
3 half were university and university affiliated hospitals, 3 hospitals with more than 2,000 beds and  
4 the biggest one with 4,300 beds. The number of admissions in each included ICUs varied from 120  
5 to 890 per year.

6 Figure 1 here

7 **Figure 1 Framework of Study to Understand Burnout among Liaoning ICU Nurses, the**  
8 **SUBLIN study**

1 **Table 1 Characteristics of 14 included Intensive Care Units in Liaoning province, China, the**  
 2 **SUBLIN study**  
 3

| Characteristics                             | Number (% or interquartile)                                                         |
|---------------------------------------------|-------------------------------------------------------------------------------------|
| Type of hospital                            |                                                                                     |
| University and University affiliated        | 5 (50%)                                                                             |
| Public                                      | 5 (50%)                                                                             |
| Number of Hospital beds (in 2009)           |                                                                                     |
| ≥ 1000                                      | 5 (50%, )                                                                           |
| < 1000                                      | 5 (50%)                                                                             |
| ICU treatment provision by patient category |                                                                                     |
| Medical                                     | 10 (71.4%)                                                                          |
| Surgical                                    | 4 (28.6%)                                                                           |
| Number of ICU beds                          | Median: 12<br>Interval: 6-28<br>Interquartile interval: 9-15                        |
| Number of ICU admissions per year           | Median: 300<br>Interval: 120-890<br>Interquartile interval: 165-600                 |
| ICU mortality in 2009 (%)                   | Median: 14.3%<br>Interval: 4.5%-21.0%<br>Interquartile interval: 9.2%-16.7%         |
| Average ICU length of stay (days)           | Median: 6.3<br>Interval: 3-30<br>Interquartile interval: 4.5-12.3                   |
| Number of ICU nurses                        | Median: 26<br>Interval: 10-76<br>Interquartile interval: 19-35                      |
| Patient-to-nurse ratio                      | Median: 2.2:1<br>Interval: 2.9:1 to 1.3:1<br>Interquartile interval: 2.5:1 to 1.9:1 |



1  
2  
3  
4  
5  
6  
7  
8  
9  
10  
11  
12  
13  
14  
15  
16  
17  
18  
19  
20  
21  
22  
23  
24  
25  
26  
27  
28  
29  
30  
31  
32  
33  
34  
35  
36  
37  
38  
39  
40  
41  
42  
43  
44  
45  
46  
47  
48  
49  
50  
51  
52  
53  
54  
55  
56  
57  
58  
59  
60

1 After the introduction of the study objectives provided for 431 participants, five nurses finally  
2 refused to join and 426 copies of complete questionnaires were returned, resulting in the response  
3 rate was 98.8%. The study population was a young population, with the median age 25 years old,  
4 interquartile range 19 to 52 years old and female nurses accounted the major part (88.5%). Sixty-  
5 eight nurses (16.0%) were found to have a high degree of burnout, earning high EE and DP scores  
6 together with a low PA score. The proportion difference with statistical significance was only found  
7 in the group defined according to the years of experience as a registered nurse. About one quarter  
8 of those nurses that had been working as a registered nurse for 5 to 10 years had a high degree of  
9 burnout (Table 2).

10 When evaluated in each EE, DP and PA subscale, 184, 111 and 177 nurses stayed at the high  
11 level of burnout, respectively. Thus the most pronounced symptoms of burnout were emotional  
12 exhaustion and personal accomplishment. Among all the studied variables, the statistical  
13 significance was found for the DP scores among the nurses that with different education level,  
14 nurses that hold a junior college diploma were with a higher DP score when compared with the  
15 other two counterparts (Table 2).

**Table 2 Sociodemographic characteristics of the ICU nurses in Liaoning province, China, the SUBLIN study**

| Variables                                                                                  | Number (%)   | Number of nurses having a high degree of burnout | EE          |     |          | DP   |           |     | PA       |      |             |     |          |      |
|--------------------------------------------------------------------------------------------|--------------|--------------------------------------------------|-------------|-----|----------|------|-----------|-----|----------|------|-------------|-----|----------|------|
|                                                                                            |              |                                                  | Mean±SD     | Low | Moderate | High | Mean      | Low | Moderate | High | Mean        | Low | Moderate | High |
|                                                                                            |              | 68                                               | 24.55±12.36 | 149 | 93       | 184  | 7.05±6.50 | 214 | 101      | 111  | 35.08±9.36  | 154 | 95       | 177  |
| <b>Gender</b>                                                                              |              |                                                  |             |     |          |      |           |     |          |      |             |     |          |      |
| Female                                                                                     | 377 (88.5%)  | 59                                               | 24.49±12.58 | 136 | 80       | 161  | 6.97±6.55 | 194 | 86       | 97   | 35.14±9.62  | 143 | 79       | 155  |
| Male                                                                                       | 49 (11.5%)   | 9                                                | 25.06±4.53  | 13  | 13       | 23   | 7.65±6.18 | 20  | 15       | 14   | 34.69±7.12  | 11  | 16       | 22   |
| <i>P</i> value                                                                             |              | 0.63                                             | 0.73        |     | 0.32     |      | 0.49      |     | 0.25     |      | 0.70        |     | 0.16     |      |
| <b>Age</b> (years, Median, 25 yrs; interval, 19-52 yrs; interquartile interval, 23-28 yrs) |              |                                                  |             |     |          |      |           |     |          |      |             |     |          |      |
| <30                                                                                        | 357 (83.8%)  | 56                                               | 24.61±12.29 | 123 | 81       | 153  | 7.18±6.45 | 174 | 86       | 97   | 34.91±9.22  | 123 | 84       | 150  |
| 30-40                                                                                      | 62 (14.6%)   | 11                                               | 24.29±12.84 | 24  | 10       | 28   | 6.50±6.76 | 35  | 14       | 13   | 35.79±10.36 | 28  | 9        | 25   |
| >40                                                                                        | 7 (1.6%)     | 1                                                | 24.14±13.50 | 2   | 2        | 3    | 5.14±5.90 | 5   | 1        | 1    | 37.71±7.68  | 3   | 2        | 2    |
| <i>P</i> value                                                                             |              | 0.91                                             | 0.98        |     | 0.98     |      | 0.55      |     | 0.27     |      | 0.60        |     | 0.51     |      |
| <b>Highest level of nurse education</b>                                                    |              |                                                  |             |     |          |      |           |     |          |      |             |     |          |      |
| Secondary nursing school                                                                   | 57 (13.4 %)  | 7                                                | 24.98±12.98 | 19  | 13       | 25   | 6.49±5.90 | 29  | 15       | 13   | 34.00±10.02 | 17  | 12       | 28   |
| Junior college                                                                             | 219 (51.4 %) | 40                                               | 25.04±12.05 | 73  | 47       | 99   | 7.81±6.90 | 101 | 54       | 64   | 34.68±8.97  | 71  | 56       | 92   |
| Bachelor and Master                                                                        | 150 (35.2%)  | 21                                               | 23.68±12.61 | 57  | 33       | 60   | 6.15±6.00 | 84  | 32       | 34   | 36.08±9.64  | 66  | 27       | 57   |
| <i>P</i> value                                                                             |              | 0.39                                             | 0.56        |     | 0.47     |      | 0.04      |     | 0.15     |      | 0.24        |     | 0.10     |      |
| <b>Job rank</b>                                                                            |              |                                                  |             |     |          |      |           |     |          |      |             |     |          |      |
| Nurse or nurse student                                                                     | 288 (67.6%)  | 40                                               | 24.29±11.97 | 100 | 66       | 122  | 7.01±6.33 | 143 | 73       | 72   | 35.20±8.83  | 104 | 67       | 117  |
| Nurse Practitioner                                                                         | 95 (22.3%)   | 22                                               | 25.51±12.48 | 31  | 23       | 41   | 7.51±7.11 | 47  | 18       | 30   | 34.18±10.04 | 28  | 23       | 44   |
| Nurse-in-charge and higher                                                                 | 43 (10.1%)   | 6                                                | 24.19±14.72 | 18  | 4        | 21   | 6.30±6.32 | 24  | 10       | 9    | 36.30±11.23 | 22  | 5        | 16   |
| <i>P</i> value                                                                             |              | 0.09                                             | 0.70        |     | 0.96     |      | 0.59      |     | 0.59     |      | 0.44        |     | 0.17     |      |
| <b>Marital status</b>                                                                      |              |                                                  |             |     |          |      |           |     |          |      |             |     |          |      |
| Unmarried                                                                                  | 277 (65.0%)  | 38                                               | 24.35±12.48 | 99  | 60       | 118  | 6.96±6.46 | 140 | 68       | 69   | 35.12±9.20  | 99  | 67       | 111  |
| Married                                                                                    | 149          | 30                                               | 24.93±12.17 | 50  | 33       | 66   | 7.21±6.59 | 74  | 33       | 42   | 35.02±9.70  | 55  | 28       | 66   |

1  
2  
3  
4  
5  
6  
7  
8  
9  
10  
11  
12  
13  
14  
15  
16  
17  
18  
19  
20  
21  
22  
23  
24  
25  
26  
27  
28  
29  
30  
31  
32  
33  
34  
35  
36  
37  
38  
39  
40  
41  
42  
43  
44  
45  
46  
47  
48  
49

|                                                                                                                       |                |         |             |      |      |      |           |      |      |    |             |     |    |     |  |
|-----------------------------------------------------------------------------------------------------------------------|----------------|---------|-------------|------|------|------|-----------|------|------|----|-------------|-----|----|-----|--|
|                                                                                                                       |                | (35.0%) |             |      |      |      |           |      |      |    |             |     |    |     |  |
| <i>P</i> value                                                                                                        |                |         | 0.08        | 0.65 | 0.67 | 0.70 | 0.67      | 0.92 | 0.71 |    |             |     |    |     |  |
| <b>Years of experience as a registered nurse</b> (Median, 3 yrs; interval, 0-32 yrs; interquartile interval, 3-7 yrs) |                |         |             |      |      |      |           |      |      |    |             |     |    |     |  |
| <5                                                                                                                    | 268<br>(62.9%) | 33      | 23.54±12.10 | 102  | 59   | 107  | 6.90±6.40 | 137  | 66   | 65 | 35.43±9.21  | 99  | 61 | 108 |  |
| 5-10                                                                                                                  | 107<br>(25.1%) | 27      | 27.38±12.33 | 29   | 24   | 54   | 7.99±6.99 | 47   | 23   | 37 | 33.58±8.95  | 30  | 27 | 50  |  |
| 11-19                                                                                                                 | 39<br>(9.2%)   | 6       | 23.87±13.52 | 13   | 8    | 18   | 5.62±5.64 | 23   | 9    | 7  | 36.15±11.22 | 19  | 5  | 15  |  |
| 20 or more                                                                                                            | 12<br>(2.8%)   | 2       | 24.00±12.15 | 5    | 2    | 5    | 6.50±6.36 | 7    | 3    | 2  | 37.33±9.37  | 6   | 2  | 4   |  |
| <i>P</i> value                                                                                                        |                |         | 0.02        | 0.06 | 0.19 | 0.23 | 0.15      | 0.23 | 0.22 |    |             |     |    |     |  |
| <b>Years of experience as an ICU nurse</b> (Median, 2 yrs; interval, 0-20 yrs; interquartile interval, 1-4 yrs)       |                |         |             |      |      |      |           |      |      |    |             |     |    |     |  |
| <5                                                                                                                    | 332<br>(77.9%) | 46      | 23.89±12.07 | 123  | 73   | 136  | 6.84±6.35 | 169  | 82   | 81 | 35.32±9.19  | 121 | 77 | 134 |  |
| 5-10                                                                                                                  | 82<br>(19.2%)  | 20      | 27.38±13.44 | 22   | 18   | 42   | 7.83±7.18 | 40   | 14   | 28 | 33.65±9.92  | 26  | 17 | 39  |  |
| 11-19                                                                                                                 | 10<br>(2.3%)   | 2       | 24.00±11.08 | 3    | 2    | 5    | 7.70±6.15 | 4    | 4    | 2  | 37.20±10.22 | 5   | 1  | 4   |  |
| 20 or more                                                                                                            | 2<br>(0.5%)    | 0       | 21.50±12.02 | 1    | 0    | 1    | 5.50±3.54 | 1    | 1    | 0  | 44.00±4.24  | 2   | 0  | 0   |  |
| <i>P</i> value                                                                                                        |                |         | 0.11        | 0.15 | 0.29 | 0.63 | 0.76      | 0.22 | 0.23 |    |             |     |    |     |  |

SD: Standard deviation. Percentages may not add up to 100% due to rounding.

## 1 DISCUSSION

2 This multi-center study revealed that as many as 16% of the ICU nursing team  
3 showed a high level of burnout in all three dimensions. For each subscale, the  
4 highest proportion of high-degree (43.2%) was found in the emotional exhaustion  
5 subscale, followed by 41.2% in personal accomplishment subscale and 26.1% in  
6 depersonalization subscale. Given the fact that the well-being of the ICU nurses is of  
7 critical importance to the quality of critically ill patients who are likely to benefit from  
8 ICU care, this kind of investigation into the burnout level of this population could  
9 catch more attention to ICU caregivers.

10 In Liaoning, China, there are still no complete epidemiologic data to state the actual,  
11 overall situation regarding burnout status among ICU nurses, to the best of our  
12 knowledge, this is the first burnout study among Liaoning ICU nurses. Most of the  
13 respondents indicated that the investigation from nurses' perspective might  
14 contribute to not only the mutual understanding between nurse leaders, ICU  
15 managers and nurses, but also their greater self-awareness of burnout. This study  
16 strengthened the power of the Critical Care Special Committee nested in Nursing  
17 Association of China Liaoning Branch and added an appeal to the nurse students to  
18 work in ICU. When focusing on the prevalence and the prevention of occupational  
19 burnout in order to develop effective interventions, a few characteristics should be  
20 taken into account. There is a linear relationship between emotional exhaustion and  
21 depersonalization, both subscales, emotional exhaustion and depersonalization can  
22 discriminate between burned out and non-burned out employees.[17] On the other  
23 hand, low levels of personal accomplishment and high degree of depersonalization in  
24 the burnout scores may actually be protective against stress.[18] Moreover, high  
25 levels of emotional exhaustion cause stress and that stress causes high levels of  
26 emotional exhaustion. In addition, depersonalization may reduce stress, whereas  
27 high degrees of personal accomplishment may increase stress levels.[19]

1  
2  
3 1 The present study has its limitations. Firstly, although the rate of response to the  
4  
5 2 questionnaire was excellent, five nurses refused to join the study after the  
6  
7 3 introduction of the study objectives. This refusal might have been related to that they  
8  
9 4 were already exhausted at that time due to various reasons, such as, heavy work  
10  
11 5 load. Secondly, the researcher in each participating ICU was the ICU head nurse,  
12  
13 6 and to some extent, the firsthand acquaintance might affect the information those  
14  
15 7 nurses provided. We tried to minimize the kind of worry, the anonymous  
16  
17 8 questionnaire was a structured questionnaire, the participants only needed to put a  
18  
19 9 tick opposite each choice, the pen they used was also provided by the stationery  
20  
21 10 office of each hospital. Thus, it was difficult to trace the participant information  
22  
23 11 according to these tick marks. Thirdly, the number of nurses in each participating  
24  
25 12 hospital was more than one thousand, the demographic data of total registered  
26  
27 13 nurses in the hospital was available for 3 hospitals, thus those data for the ICU  
28  
29 14 nurses from those 3 nested ICUs could be compared to the total registered nurses of  
30  
31 15 the hospital, and no statistical differences were found. In addition, there may have  
32  
33 16 been important differences of various clinical settings, for example, work climate, the  
34  
35 17 characteristics of the patients, work load, relationship between doctors and nurses,  
36  
37 18 institutional policy, coping strategies and etc, the results are not generalizable to all  
38  
39 19 Chinese ICU nurses as a whole.

40  
41  
42 20 This proportion of burnout (16% in all 3 dimensions, and 26.1% to 43.2% in each  
43  
44 21 single subscale) among Liaoning ICU nurses that experienced a high degree of  
45  
46 22 burnout is in the range of several recently published studies that reported the  
47  
48 23 distribution of high-level burnout among ICU nurses, around one-third of the ICU  
49  
50 24 nurses having a high level of burnout.[20-23] In 2005, a Maslach Burnout Inventory-  
51  
52 25 General Survey based investigation was conducted in a convenience sample of staff  
53  
54 26 nurses in Henan province in China, the participants were all females, mean age was  
55  
56 27 29 years with a range from 18 to 60 years and 66% had experience in nursing for 5  
57  
58  
59  
60

1 years or more. They focused on the nurses from provincial hospitals, supported the  
2 view that nurses commonly experience burnout and the study reported that scores  
3 for burnout of surgical and medical nurses were statistically significantly higher than  
4 those of other nurses, lower educational status was associated with higher levels of  
5 burnout in young nurses. However, in the present study, the highest proportion of the  
6 nurses that experiencing high degree of burnout was found for the nurses with 5 to  
7 10 years' employment as a registered nurse. Around 11.5% of the participants in our  
8 study were males, and 63% of the included ICU nurses had less than 5 years of  
9 employment as a registered nurse. The differences between that study and our study  
10 revealed that burnout was associated with demographic characteristics, such as age,  
11 educational level, the kind of clinical setting and years of employment as a nurse or  
12 an ICU nurse, cautions should be exercised when comparing the results originated  
13 from different studies.[24]

14 This result might help the ICU head nurse to take some actions to explore the  
15 feelings, concerns and difficulties of ICU nurses and explore possible solutions and  
16 interventions correspondingly.[25,26] High-risk factors[27] and possible protective  
17 factors[28,29] that associated with burnout level in Liaoning ICU nurses, such as  
18 work environment, job satisfaction, social support and coping strategies will be  
19 explored in the next stage of the SUBLIN study.

20 **Appendix**-Study Team (SUBLIN Study), Chun-Mei Gu, Li-Huan Hu, Hong-Fei Li, Li-  
21 Hong Liu, Long-Feng Sun, Xuan Wang, Xiao-Jiang Yu, Jun-Li Zhang, Li-Hong Zhang,  
22 Shen-Ping Zhang, Wen-Jing Zhao, Li-Yuan Zheng.

### 23 **Acknowledgements**

24 This project was made possible by the efforts of 14 collaborative ICUs from 10  
25 hospitals and by the enthusiastic support and active participation of the nurses.

### 26 **Contributors**

1  
2  
3 1 XCZ conceived of the study, participated in its design and coordination. XZ and PG  
4  
5 2 had full access to all of the data in the study, took responsibility for the integrity of the  
6  
7 3 data and the accuracy of the data analysis and drafted the manuscript. DSH  
8  
9 4 participated in its design, analysis and coordination, and helped to draft the  
10  
11 5 manuscript. All authors reviewed and approved the final manuscript.

## 12 **Funding**

13  
14  
15 7 This work was supported by the Natural Science Foundation of Liaoning Province,  
16  
17 8 China, grant number 201320014. This work was also a part of the programme for  
18  
19 9 Elaborate Course of Epidemiology and Key Disciplines Construction supported by  
20  
21 10 China Medical University, grant number CMU Internal Circular-J-[2010]-16-31 and  
22  
23 11 Internal Circular-F-[2011]-5).

## 24 **Competing interests**

25  
26  
27  
28 13 None

## 29 **REFERENCES**

- 30  
31  
32  
33 15 1. Nardi DA, Gyurko CC. The global nursing faculty shortage: status and solutions for  
34  
35 16 change. *J Nurs Scholarsh* 2013;**45**:317-26.
- 36  
37 17 2. Reinert J, Bigelow A, Kautz DD. Overcoming nursing faculty shortages and  
38  
39 18 bridging the gap between education and practice. *J Nurses Staff Dev* 2012;**28**:216-  
40  
41 19 8.
- 42  
43 20 3. Ahmed SM, Hossain MA, Rajachowdhury AM, Bhuiya AU. The health workforce  
44  
45 21 crisis in Bangladesh: shortage, inappropriate skill-mix and inequitable distribution.  
46  
47 22 *Hum Resour Health* 2011;**9**:3.
- 48  
49 23 4. Farsi Z, Dehghan-Nayeri N, Negarandeh R, *et al*. Nursing profession in Iran: an  
50  
51 24 overview of opportunities and challenges. *Jpn J Nurs Sci* 2010;**7**:9-18.
- 52  
53 25 5. Duvall JJ, Andrews DR. Using a structured review of the literature to identify key  
54  
55 26 factors associated with the current nursing shortage. *J Prof Nurs* 2010;**26**:309-17.
- 56  
57  
58  
59  
60

- 1  
2  
3 1 6. Wynn SD. Addressing the nursing workforce shortage: veterans as mental health  
4  
5 2 nurses. *J Psychosoc Nurs Ment Health Serv* 2013;**51**:3-4.  
6  
7 3 7. Chan ZC, Tam WS, Lung MK, *et al*. A systematic literature review of nurse  
8  
9 4 shortage and the intention to leave. *J Nurs Manag* 2013;**21**:605-13.  
10  
11 5 8. Hsiao WC. When incentives and professionalism collide. *Health Aff (Millwood)*  
12  
13 6 2008;**27**:949-51.  
14  
15 7 9. Ma J, Lu M, Quan H. From a national, centrally planned health system to a system  
16  
17 8 based on the market: lessons from China. *Health Aff (Millwood)* 2008;**27**:937-48.  
18  
19 9 10. Yu D, Li T. Facing up to the threat in China. *Lancet* 2010;**376**:1823-4.  
20  
21 10 11. Wagstaff A, Yip W, Lindelow M, *et al*. China's health system and its reform: a  
22  
23 11 review of recent studies. *Health Econ* 2009;**18**:S7-23.  
24  
25 12 12. Du B, Xi X, Chen D, Peng J, *et al*. Clinical review: critical care medicine in  
26  
27 13 mainland China. *Crit Care* 2010;**14**:206.  
28  
29 14 13. Maslach C, Jackson SE. The measurement of experienced burnout. *J Occup*  
30  
31 15 *Behav* 1981;**2**:99-113.  
32  
33 16 14. Ye ZH, Luo H, Jiang HL. Diagnostic standard and norms of Maslach Burnout  
34  
35 17 *Inventory for nurses in Hangzhou. Chinese Journal of Nursing* 2008;**43**:207-9. (in  
36  
37 18 Chinese)  
38  
39 19 15. Schaufeli WB, Van Dierendonck D. A cautionary note about the cross-national  
40  
41 20 and clinical validity of cut-off points for the Maslach Burnout Inventory. *Psychol Rep*  
42  
43 21 1995;**76**:1083-90.  
44  
45 22 16. Wu J, Dai Y, Ning Y, *et al*. Study of the status and correlative factors of job  
46  
47 23 burnout among nurses in Xinjiang. *Journal of Nursing Administration* 2011;**11**:7-9.  
48  
49 24 (in Chinese)  
50  
51  
52  
53  
54  
55  
56  
57  
58  
59  
60



- 1  
2  
3 1 17. Schaufeli WB, Bakker AB, Hoogduin K, *et al.* on the clinical validity of the  
4  
5 2 maslach burnout inventory and the burnout measure. *Psychol Health* 2001;**16**:565-  
6  
7 3 82.  
8  
9 4 18. Onder C, Basim N. Examination of developmental models of occupational  
10  
11 5 burnout using burnout profiles of nurses. *J Adv Nurs* 2008;**64**:514-23.  
12  
13 6 19. McManus IC, Winder BC, Gordon D. The causal links between stress and  
14  
15 7 burnout in a longitudinal study of UK doctors. *Lancet* 2002;**359**:2089-90.  
16  
17 8 20. Teixeira C, Ribeiro O, Fonseca AM, *et al.* Burnout in intensive care units - a  
18  
19 9 consideration of the possible prevalence and frequency of new risk factors: a  
20  
21 10 descriptive correlational multicentre study. *BMC Anesthesiol* 2013;**13**:38.  
22  
23 11 21. Poncet MC, Toullic P, Papazian L, *et al.* Burnout syndrome in critical care nursing  
24  
25 12 staff. *Am J Respir Crit Care Med* 2007;**175**:698-704.  
26  
27 13 22. Verdon M, Merlani P, Perneger T, *et al.* Burnout in a surgical ICU team. *Intensive*  
28  
29 14 *Care Med* 2008;**34**:152-6.  
30  
31 15 23. Liu K, You LM, Chen SX, *et al.* The relationship between hospital work  
32  
33 16 environment and nurse outcomes in Guangdong, China: a nurse questionnaire  
34  
35 17 survey. *J Clin Nurs* 2012;**21**:1476-85.  
36  
37 18 24. Wu S, Zhu W, Wang Z, *et al.* Relationship between burnout and occupational  
38  
39 19 stress among nurses in China. *J Adv Nurs* 2007;**59**:233-9.  
40  
41 20 25. Yao Y, Yao W, Wang W, *et al.* Investigation of risk factors of psychological  
42  
43 21 acceptance and burnout syndrome among nurses in China. *Int J Nurs Pract*  
44  
45 22 2013;**19**:530-8.  
46  
47 23 26. Lei W, Youn Hee K, Dong W. A review of research and strategies for burnout  
48  
49 24 among Chinese nurses. *Br J Nurs* 2010;**19**:844-50.  
50  
51  
52  
53  
54  
55  
56  
57  
58  
59  
60

- 1  
2  
3 27. Karanikola MN, Papathanassoglou ED, Mpouzika M, *et al.* Burnout syndrome  
4 indices in Greek intensive care nursing personnel. *Dimens Crit Care Nurs*  
5 2012;**31**:94-101.  
6  
7  
8  
9 28. Quenot JP, Rigaud JP, Prin S, *et al.* Suffering among carers working in critical  
10 care can be reduced by an intensive communication strategy on end-of-life  
11 practices. *Intensive Care Med* 2012;**38**:55-61.  
12  
13  
14  
15  
16 29. Beanland C. Tackling the workforce shortage. *Aust Nurs J* 2013;**20**:47-8.  
17  
18  
19  
20  
21  
22  
23  
24  
25  
26  
27  
28  
29  
30  
31  
32  
33  
34  
35  
36  
37  
38  
39  
40  
41  
42  
43  
44  
45  
46  
47  
48  
49  
50  
51  
52  
53  
54  
55  
56  
57  
58  
59  
60

# 1. Figure Types

---

## Line Art

Line art has sharp, clean lines and geometrical shapes against a white background. Line art is typically used for tables, charts, graphs, and gene sequences. You can use a program like Illustrator to create high-quality line art. A minimum resolution of 300 ppi will maintain the crisp edges of the lines and shapes.

- Format: TIFF or EPS
- Minimum Resolution: 300 ppi

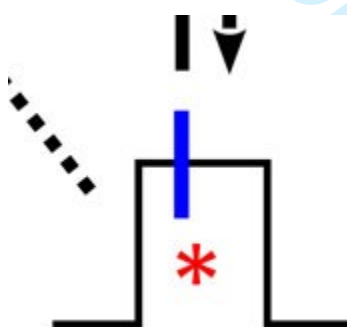

## Grayscale

Grayscale figures contain varying tones of black and white. They contain no color, so grayscale is synonymous with "black and white." The gray scale is divided into 256 sections with black at 0 and white at 255. Software for preparation of grayscale art includes Photoshop.

- Format: TIFF or EPS
- Minimum Resolution: 300 ppi

## Halftones

The best example of a halftone is a photograph, but halftones include any image that uses continuous shading or blending of colors or grays, such as gels, stains, microarrays, brain scans, and molecular structures. To prepare and manipulate halftone images, use Photoshop or a comparable photo-editing program.

- Format: TIFF
- Minimum Resolution: 300 ppi

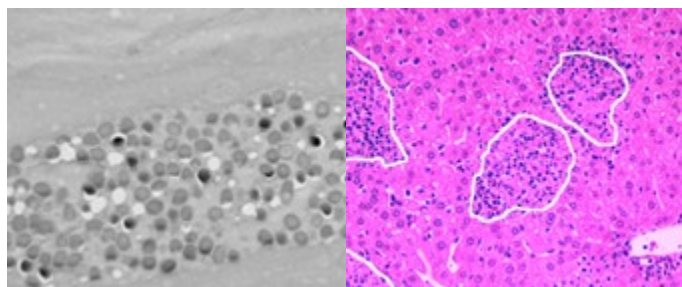

## Combination Figures

Combination figures contain two or more types of images, for example, a halftone figure containing text. You should embed the images, group the objects, or flatten the layers, and flatten transparencies before saving as TIFF at a minimum of 300 ppi.

- Format: TIFF
- Minimum Resolution: 300 ppi

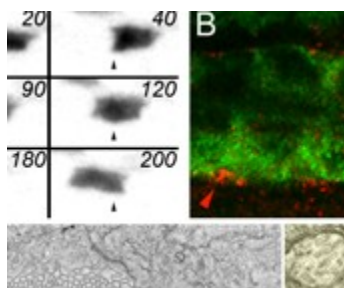

## Convert PowerPoint Files to High-Resolution TIFFs

**Caution:** Do not add artwork to your PowerPoint slides by copying from another application and then pasting into PowerPoint. Your figures will be downsampled to screen resolution. Instead use Insert > Picture > From File.

**Caution:** Do not use File > Save as > TIFF. This will result in a low-resolution, poor-quality figure.

## Convert Excel or Word Files to High-Resolution TIFFs

**Windows 98, XP, Vista and Excel/Word 2003 or 2007:**

### Step I: Convert Excel/Word File to PDF

There are two possible ways to create PDFs from Excel/Word files: use the Adobe PDF menu in some versions of Excel/Word, or create a PDF via the Print command.

- 1
- 2
- 3
- 4 1. Open your file in Excel/Word. From the Adobe PDF menu, select Change Conversion
- 5 Settings. The PDFMaker Settings dialog displays.
- 6
- 7 2. From the Conversion settings dropdown menu, select Press Quality. Uncheck View Adobe
- 8 PDF result. Click OK.
- 9
- 10 3. From the Adobe PDF menu, select Convert to Adobe PDF. You will be asked to save the
- 11 PDF file to a location of your choosing.
- 12
- 13 4. Click OK.

14 - OR -

- 15
- 16
- 17 1. Open your file in Excel/Word.
- 18 2. Select Print from the File dropdown menu.
- 19 3. Select the Adobe PDF (or similar driver) in the Printer Name window.
- 20 4. Click Properties. Change the Default Settings pull-down to Press Quality. Uncheck the
- 21 "View Adobe PDF results" box if you don't want Acrobat to launch.
- 22 5. Click OK, then click OK. Pick where the PDF will be created, and click Save.
- 23
- 24
- 25
- 26

## 27 **Step II: Convert Individual PDF Files to TIFFs**

28

29 In Photoshop:

- 30
- 31
- 32 1. File→Open the PDF. You will need to do this one page at a time. Make sure you're
- 33 importing it at 300ppi, RGB.
- 34 2. Use the Crop Tool (fifth from the top of the toolbar) to select an area close to the borders
- 35 of your image. Hit Enter to apply the crop.
- 36 3. Layer→Flatten Image
- 37 4. Image→Image Size. Uncheck the Resample Image checkbox. If the Width is over
- 38 17.35cm, type 17.35 in the Width box (17.35cm is our maximum allowable width for
- 39 figures). The Resolution will go up automatically as the Width decreases. If the resolution
- 40 does not hit 300 when you make the Width 17.35, type 300 in Resolution and as long as
- 41 Width doesn't go below 8.3cm, everything is fine. Also, the height cannot be more than
- 42 23.35. If the Height and Width are within these prescribed limits, no adjustment to your
- 43 figure size needs to be made.
- 44 5. File→Save As. Save as TIFF, Image Compression set to LZW, Pixel Order set to
- 45 Interleaved, Byte Order set to IBM PC.
- 46
- 47
- 48
- 49
- 50
- 51
- 52
- 53
- 54
- 55
- 56
- 57
- 58
- 59
- 60

**STROBE 2007 (v4) Statement—Checklist of items that should be included in reports  
of cross-sectional studies**

| Section/Topic                | Item # | Recommendation                                                                                                                                                                       | Reported on page # |
|------------------------------|--------|--------------------------------------------------------------------------------------------------------------------------------------------------------------------------------------|--------------------|
| Title and abstract           | 1      | (a) Indicate the study's design with a commonly used term in the title or the abstract                                                                                               | #1                 |
|                              |        | (b) Provide in the abstract an informative and balanced summary of what was done and what was found                                                                                  | #2                 |
| <b>Introduction</b>          |        |                                                                                                                                                                                      |                    |
| Background/rationale         | 2      | Explain the scientific background and rationale for the investigation being reported                                                                                                 | #4                 |
| Objectives                   | 3      | State specific objectives, including any prespecified hypotheses                                                                                                                     | #5                 |
| <b>Methods</b>               |        |                                                                                                                                                                                      |                    |
| Study design                 | 4      | Present key elements of study design early in the paper                                                                                                                              | #5                 |
| Setting                      | 5      | Describe the setting, locations, and relevant dates, including periods of recruitment, exposure, follow-up, and data collection                                                      | #5                 |
| Participants                 | 6      | (a) Give the eligibility criteria, and the sources and methods of selection of participants                                                                                          | #5,#7              |
| Variables                    | 7      | Clearly define all outcomes, exposures, predictors, potential confounders, and effect modifiers. Give diagnostic criteria, if applicable                                             | #6-#7              |
| Data sources/<br>measurement | 8*     | For each variable of interest, give sources of data and details of methods of assessment (measurement). Describe comparability of assessment methods if there is more than one group | #6-#7              |
| Bias                         | 9      | Describe any efforts to address potential sources of bias                                                                                                                            | #14                |
| Study size                   | 10     | Explain how the study size was arrived at                                                                                                                                            | #5                 |
| Quantitative variables       | 11     | Explain how quantitative variables were handled in the analyses. If applicable, describe which groupings were chosen and why                                                         | #7                 |
| Statistical methods          | 12     | (a) Describe all statistical methods, including those used to control for confounding                                                                                                | #7-#8              |
|                              |        | (b) Describe any methods used to examine subgroups and interactions                                                                                                                  | #8                 |
|                              |        | (c) Explain how missing data were addressed                                                                                                                                          | NA                 |
|                              |        | (d) If applicable, describe analytical methods taking account of sampling strategy                                                                                                   | NA                 |

|                          |     |                                                                                                                                                                                                              |         |
|--------------------------|-----|--------------------------------------------------------------------------------------------------------------------------------------------------------------------------------------------------------------|---------|
|                          |     | (e) Describe any sensitivity analyses                                                                                                                                                                        | NA      |
| <b>Results</b>           |     |                                                                                                                                                                                                              |         |
| Participants             | 13* | (a) Report numbers of individuals at each stage of study—eg numbers potentially eligible, examined for eligibility, confirmed eligible, included in the study, completing follow-up, and analysed            | #7-#10  |
|                          |     | (b) Give reasons for non-participation at each stage                                                                                                                                                         | #7      |
|                          |     | (c) Consider use of a flow diagram                                                                                                                                                                           | Yes     |
| Descriptive data         | 14* | (a) Give characteristics of study participants (eg demographic, clinical, social) and information on exposures and potential confounders                                                                     | #8-#10  |
|                          |     | (b) Indicate number of participants with missing data for each variable of interest                                                                                                                          | NA      |
| Outcome data             | 15* | Report numbers of outcome events or summary measures                                                                                                                                                         | #9-#12  |
| Main results             | 16  | (a) Give unadjusted estimates and, if applicable, confounder-adjusted estimates and their precision (eg, 95% confidence interval). Make clear which confounders were adjusted for and why they were included | #10     |
|                          |     | (b) Report category boundaries when continuous variables were categorized                                                                                                                                    | #11-#12 |
|                          |     | (c) If relevant, consider translating estimates of relative risk into absolute risk for a meaningful time period                                                                                             | NA      |
| Other analyses           | 17  | Report other analyses done—eg analyses of subgroups and interactions, and sensitivity analyses                                                                                                               | #11-#12 |
| <b>Discussion</b>        |     |                                                                                                                                                                                                              |         |
| Key results              | 18  | Summarise key results with reference to study objectives                                                                                                                                                     | #13     |
| Limitations              | 19  | Discuss limitations of the study, taking into account sources of potential bias or imprecision. Discuss both direction and magnitude of any potential bias                                                   | #14     |
| Interpretation           | 20  | Give a cautious overall interpretation of results considering objectives, limitations, multiplicity of analyses, results from similar studies, and other relevant evidence                                   | #15     |
| Generalisability         | 21  | Discuss the generalisability (external validity) of the study results                                                                                                                                        | #15     |
| <b>Other information</b> |     |                                                                                                                                                                                                              |         |
| Funding                  | 22  | Give the source of funding and the role of the funders for the present study and, if applicable, for the original study on which the present article is based                                                | #16     |

1  
2  
3 \*Give information separately for cases and controls in case-control studies and, if applicable, for  
4 exposed and unexposed groups in cohort and cross-sectional studies.  
5  
6

7 **Note:** An Explanation and Elaboration article discusses each checklist item and gives methodological  
8 background and published examples of transparent reporting. The STROBE checklist is best used in  
9 conjunction with this article (freely available on the Web sites of PLoS Medicine at  
10 <http://www.plosmedicine.org/>, Annals of Internal Medicine at <http://www.annals.org/>, and  
11 Epidemiology at <http://www.epidem.com/>). Information on the STROBE Initiative is available at  
12 [www.strobe-statement.org](http://www.strobe-statement.org).  
13  
14  
15  
16  
17  
18  
19  
20  
21  
22  
23  
24  
25  
26  
27  
28  
29  
30  
31  
32  
33  
34  
35  
36  
37  
38  
39  
40  
41  
42  
43  
44  
45  
46  
47  
48  
49  
50  
51  
52  
53  
54  
55  
56  
57  
58  
59  
60



# BMJ Open

## Job burnout among critical care nurses from 14 adult ICUs in northeastern China: a cross-sectional survey

|                                 |                                                                                                                                                                                                       |
|---------------------------------|-------------------------------------------------------------------------------------------------------------------------------------------------------------------------------------------------------|
| Journal:                        | <i>BMJ Open</i>                                                                                                                                                                                       |
| Manuscript ID:                  | bmjopen-2014-004813.R2                                                                                                                                                                                |
| Article Type:                   | Research                                                                                                                                                                                              |
| Date Submitted by the Author:   | 03-Jun-2014                                                                                                                                                                                           |
| Complete List of Authors:       | Zhang, Xiao-Chun; The First Affiliated Hospital, China Medical University, Cardiology<br>Huang, De-Sheng; China Medical University, Mathematics<br>Guan, Peng; China Medical University, Epidemiology |
| <b>Primary Subject Heading</b>: | Epidemiology                                                                                                                                                                                          |
| Secondary Subject Heading:      | Nursing                                                                                                                                                                                               |
| Keywords:                       | Burnout, Intensive Care Units, nurses                                                                                                                                                                 |
|                                 |                                                                                                                                                                                                       |

SCHOLARONE™  
Manuscripts

1 **Job burnout among critical care nurses from 14 adult ICUs in northeastern China: a**  
2 **cross-sectional survey**

3 Xiao-Chun Zhang<sup>1</sup>, De-Sheng Huang<sup>2</sup>, Peng Guan<sup>3</sup>

4 <sup>1</sup> Cardiac Critical Care Unit, Department of Cardiology, The First Affiliated Hospital, China Medical  
5 University, Shenyang 110001, China.

6 <sup>2</sup> Department of Mathematics, College of Basic Medical Sciences, China Medical University,  
7 Shenyang 110001, China.

8 <sup>3</sup> Department of Epidemiology, School of Public Health, China Medical University, Shenyang  
9 110001, China.

10

11 **§Corresponding author:** Peng Guan, Department of Epidemiology, School of Public Health,  
12 China Medical University, Shenyang 110001, China; Phone:+86-24-23256666 ext. 5401; Fax: +86-  
13 24-23258982; E-mail: pguan@mail.cmu.edu.cn

14

15 **Key words:** Burnout, Intensive Care Units, nurses

16 **Word count (main text):** 2670 words

1  
2  
3  
4  
5  
6  
7  
8  
9  
10  
11  
12  
13  
14  
15  
16  
17  
18  
19  
20  
21  
22  
23  
24  
25  
26  
27  
28  
29  
30  
31  
32  
33  
34  
35  
36  
37  
38  
39  
40  
41  
42  
43  
44  
45  
46  
47  
48  
49  
50  
51  
52  
53  
54  
55  
56  
57  
58  
59  
60

## 1 ABSTRACT

2 **Objectives** The shortage of qualified nurses is one of the critical challenges in the field of  
3 healthcare. Among the contributing factors, job burnout has been indicated as a risk factor of the  
4 intention to leave. The purpose of this study was to provide a better understanding of the local  
5 status and reference data for coping strategies of ICU nurse burnout among Liaoning ICU Nurses.

6 **Design** Observational study.

7 **Setting** Seventeen ICUs from 10 tertiary level hospitals in Liaoning, China.

8 **Participants** Four hundred and thirty-one ICU nurses from 14 ICUs nested in 10 tertiary level  
9 hospitals in Liaoning, China were invited during October and November 2010.

10 **Primary measures** Burnout was measured with the 22-item Chinese version of Maslach Burnout  
11 Inventory-Health Service Survey (MBI-HSS) questionnaires.

12 **Results** Fourteen ICUs responded actively and were included, the response rate was 87.7%  
13 among the 486 invited participants from these 17 ICUs. The study population was a young  
14 population, with the median age 25 years old, interquartile range 19 to 52 years old and female  
15 nurses accounted the major part (88.5%). Sixty-eight nurses (16.0%) were found to have a high  
16 degree of burnout, earning high emotional exhaustion and depersonalization scores together with a  
17 low personal accomplishment score.

18 **Conclusions** The present study indicated the moderate distribution of burnout among ICU nurses  
19 in Liaoning, China. The investigation into the burnout level of this population could catch more  
20 attention to ICU caregivers.

21

1  
2  
3  
4  
5  
6  
7  
8  
9  
10  
11  
12  
13  
14  
15  
16  
17  
18  
19  
20  
21  
22  
23  
24  
25  
26  
27  
28  
29  
30  
31  
32  
33  
34  
35  
36  
37  
38  
39  
40  
41  
42  
43  
44  
45  
46  
47  
48  
49  
50  
51  
52  
53  
54  
55  
56  
57  
58  
59  
60

## 1 Strengths and limitations of this study

- 2 • This is the first study to state the actual, overall situation regarding burnout status among  
3 ICU nurses in Liaoning, China, to the best of the authors' knowledge.
- 4 • This multi-center 'Study to Understand Burnout among Liaoning ICU Nurses' revealed that  
5 as many as 16% of the responding ICU nurses showed a high level of burnout in all  
6 emotional exhaustion (EE), depersonalization (DP) and personal accomplishment (PA)  
7 dimensions.
- 8 • There may have been important differences of various clinical settings, for example, work  
9 climate, the characteristics of the patients, work load, relationship between doctors and  
10 nurses, institutional policy, coping strategies etc., the results are not generalizable to all  
11 Chinese ICU nurses as a whole.
- 12 • The researcher in each participating ICU was the ICU head nurse, and to some extent, the  
13 firsthand acquaintance might affect the information those nurses provided.

## 1 INTRODUCTION

2 Around the world, the shortage of qualified nurses is one of the critical challenges in the field of  
3 healthcare.[1-3] This shortage is a multidimensional phenomenon,[4,5] and can be attributed to low  
4 job satisfaction, lack of managerial support, poor career opportunities and etc.[6,7] Among the  
5 contributing factors, job burnout has been indicated as a risk factor of the intention to leave.

6 According to the nature, nursing is a stressful occupation due to the direct exposure to various  
7 kinds of working environments and conditions which include anxiety and depression. In China, the  
8 Chinese public is greatly dissatisfied with the high cost and low quality of health care.[8-11]

9 The study communities, Intensive Care Units (ICU) nurses were selected for three main reasons.  
10 First, as just described, with the background of China public's dissatisfaction and the high costs of  
11 intensive care, there is tense relationship between doctors and patients, an online survey revealed  
12 that 66% of 14,577 doctors said that their hospitals encountered one to three medical disputes per  
13 month.[10] More efforts have been made to improve quality of life for patients, while the care  
14 providers deserve equal attention. Second, noises, light and the radiation from those monitoring  
15 equipment that run all day long pose direct impact to the ICU nurses. Third, critical care medicine  
16 was accredited as an independent subspecialty of clinical medicine by Ministry of Health of the  
17 People's Republic of China just in January 2009. Critical care courses and educational programs  
18 taught at hospitals and universities with various kinds of duration and clinical practice are  
19 established to meet the crying need of training during the infancy stage of critical care research in  
20 mainland China.[12] Those in-service ICU nurses are the main part of supporting faculty for those  
21 training. Clear picture about the burnout status can provide some background information for the  
22 target solutions.

23 To provide a better understanding of the local status and reference data for coping strategies of  
24 ICU nurse burnout, the present cross-sectional study, 'Study to Understand Burnout among  
25 Liaoning ICU Nurses (the SUBLIN study)', was conducted to report findings.

## 26 METHODS

### 27 Study units and subjects

1 A cross-sectional survey was conducted during October and November 2010 in Liaoning province,  
2 northeastern China. The 486 ICU nurses that work in the 17 intensive care units from ten tertiary  
3 level hospitals were selected as the target population. The principal investigator and co-principal  
4 investigators contacted the head nurse of each participating ICUs via meeting or telephone to  
5 share the project objectives and collect the feedback on the questionnaire to be used. After the  
6 questionnaire approved by the project core team member and the head nurses of included ICUs,  
7 those head nurses assisted in contacting the nurse staff in first-line clinical positions who agreed to  
8 participate and arranging the schedule that the nurse could be available. The self-administered  
9 anonymous questionnaire addressed demographic data and burnout was adopted during the  
10 interview. Demographic information included age, gender, education level, marital status,  
11 professional title, the entire period of employment as a nurse and an ICU nurse. All the ICU nurses  
12 were in a sufficiently good physical and mental condition to provide reliable answers. The  
13 procedures were in accordance with the Declaration of Helsinki and the study was approved by the  
14 Ethical Committee of China Medical University. And to remove the participants' worries about that  
15 the handwriting on the anonymous questionnaires could be possibly tracked according to their  
16 signatures on the consent letter, all the participants provided oral informed consent only. After the  
17 head nurse informed the eligible participants about the survey, the head nurse in each ICU also  
18 explained that the participation was purely voluntary and the results that based on the collected  
19 questionnaire data would be published or presented in an academic symposium on ICU nursing.  
20 The head nurse designated at least 2 people to collect the completed questionnaires and check  
21 the integrity. The participating nurses were asked to finish the questionnaire within 5 days and they  
22 could complete the questionnaire either at home or on the working place.

23 The study population was a dynamic population, some events, such as sick leave, maternity leave  
24 or duty travel happened occasionally or frequently. After the negotiation between the principal  
25 investigator and the head nurse of each participating ICU, the survey schedule was fixed, and the  
26 available nurse participants were defined by the head nurse of each ICU.

## 27 **Measurement of burnout**

1 Burnout was measured with the self-reporting Chinese version of anonymous Maslach Burnout  
2 Inventory-Human Services Survey (MBI-HSS) questionnaires. It consists of three dimensions:  
3 emotional exhaustion (EE), depersonalization (DP) and personal accomplishment (PA). The items  
4 in the emotional exhaustion subscale describe the feelings of being emotionally overextended and  
5 exhausted by one's work, the items in the Depersonalization subscale describe an unfeeling and  
6 impersonal response towards recipients of one's care or service, and the items in the personal  
7 accomplishment subscale describe feelings of competence and successful achievement in one's  
8 work with people.[13] The Maslach Burnout Inventory-Human Services Survey was translated into  
9 Chinese by Samantha Mei-Che Peng from The Hong Kong Polytechnic University, its Cronbach's  
10  $\alpha = 0.73$  for the whole questionnaire, 0.86, 0.76 and 0.76 for the three subscales.[14] The total  
11 scale consists of 22 items, among which the EE dimension is measured by nine items, the DP  
12 dimension is measured by five items, and the measurement of PE dimension is based on eight  
13 items. Each of the items is scored on a Likert scale from 0 to 6. The scores are defined according  
14 to how often the statement is experienced, from 'never' (0) to 'every day' (6). Higher scores on the  
15 EE and DP dimensions and lower scores on the PA dimension indicate higher level of burnout. It  
16 has been indicated that cut-off points should be nation-specific and clinically derived to respond to  
17 cultural values, traditional gender roles and others.[15] Cut-off criteria of the MBI-HSS-C in the  
18 present study was discussed and determined by the project core team member, EE: low, less than  
19 19, moderate, 19-26, high more than 26, DP: low: less than 6, moderate, 6-9, high, more than 9,  
20 and PA: low, more than 39, moderate 34-39, high, less than 34.[16] Given the fact that the  
21 definition of burnout is still controversial, in the present study individuals with high EE scores and  
22 DP scores together with a low PA score were identified as having a high degree of burnout,[13]  
23 and the distribution data in each subscale was also provided.

### 24 **Statistical analysis**

25 In China, most of the nurses are females, male nurses, as the minority part, may stay at different  
26 level of job burnout when being compared with the counterpart female nurses. Thus, the subgroup  
27 analysis was conducted to test the differences between male nurses and females. There is  
28 increasing emphasis on higher entrance requirements of ICU nurses, and the amount of nurses'

1 salary are closely related to the job rank. And the job rank of the nurses highly rely on the  
2 education level, the length of service, the quantity and quality of scientific output, for example, the  
3 number of first-authored publications, thus the education level, job rank, years of employment as a  
4 registered nurse, and years of employment as an ICU nurse were considered for subgroup  
5 analysis. Age group was classified as <30, 30 to 40 and >40 years. Years of experience as a  
6 registered nurse was grouped as <5, 5-10, 11-19 and more than 20 years. Around 30% of the  
7 study population held a junior college diploma and 45% of the study population graduated from  
8 secondary nursing school when first employed as a nurse, part of the nurses attended part-time  
9 courses to gain a higher degree. Detailed questions on education level could disclose too much  
10 personal information, so only the highest level of education was collected in the present survey to  
11 confirm the survey was anonymous. The marital status may also have an impact on the level of  
12 burnout, stratified analysis on marital status was conducted. Differences of MBI scores for  
13 demographics and years of experience as a registered nurse or an ICU nurse were tested by the  
14 Student t-test and ANOVA. For ordinal data, Mann-Whitney U test was adopted for comparison  
15 between two groups and the Kruskal-Wallis test for comparison between more than two groups.  
16 The proportion of the nurses having a high degree of burnout in each subgroup was tested by Chi-  
17 square test. The Student t-test, ANOVA, Mann-Whitney U test and Kruskal-Wallis test were done  
18 using SPSS software (SPSS 12.0 for windows, SPSS Inc., Chicago, IL, USA). The Chi-square test  
19 was performed with the software Epi Info™ 3.4.3 (Version 3.4.3 Centers for Disease Control and  
20 Prevention, Atlanta, GA, USA). All the P values were two-sided with the P-value less than 0.05  
21 considered as statistically significant.

## 22 RESULTS

23 Among the invited 17 ICUs, fourteen ICUs from ten tertiary level hospitals responded actively and  
24 were included in the present study (Figure 1). For those uninvolved three ICUs, one ICU (25  
25 employed nurses) was at the rearrangement stage due to the decoration during the study period,  
26 one ICU (fourteen employed nurses) was at the beginning stage of being short of ICU nurses, and  
27 one ICU (sixteen employed nurses) was open-type ICU that the management mode was distinct  
28 from the other ICUs. All the included ICUs were closed-type ICU with the available 24-hour a day



1 presence of junior or intermediate intensivist, and all the nurses' working-shift was 12-hour shift.  
2  
3  
4 2 The characteristics of the 14 included ICUs are shown in Table 1. For the 10 hospitals, half were  
5  
6 3 university and university affiliated hospitals, 3 hospitals with more than 2,000 beds and the biggest  
7  
8 4 one with 4,300 beds. The number of admissions in each included ICUs varied from 120 to 890 per  
9  
10 5 year.

11  
12 Figure 1 here  
13  
14  
15  
16  
17  
18  
19  
20  
21  
22  
23  
24  
25  
26  
27  
28  
29  
30  
31  
32  
33  
34  
35  
36  
37  
38  
39  
40  
41  
42  
43  
44  
45  
46  
47  
48  
49  
50  
51  
52  
53  
54  
55  
56  
57  
58  
59  
60

For peer review only

1 **Table 1 Characteristics of 14 included Intensive Care Units in Liaoning province, China, the**

2 **SUBLIN study**

3

| Characteristics                             | Number (% or interquartile)                                                         |
|---------------------------------------------|-------------------------------------------------------------------------------------|
| Type of hospital                            |                                                                                     |
| University and University affiliated        | 5 (50%)                                                                             |
| Public                                      | 5 (50%)                                                                             |
| Number of Hospital beds (in 2009)           |                                                                                     |
| ≥ 1000                                      | 5 (50%, )                                                                           |
| < 1000                                      | 5 (50%)                                                                             |
| ICU treatment provision by patient category |                                                                                     |
| Medical                                     | 10 (71.4%)                                                                          |
| Surgical                                    | 4 (28.6%)                                                                           |
| Number of ICU beds                          | Median: 12<br>Interval: 6-28<br>Interquartile interval: 9-15                        |
| Number of ICU admissions per year           | Median: 300<br>Interval: 120-890<br>Interquartile interval: 165-600                 |
| ICU mortality in 2009 (%)                   | Median: 14.3%<br>Interval: 4.5%-21.0%<br>Interquartile interval: 9.2%-16.7%         |
| Average ICU length of stay (days)           | Median: 6.3<br>Interval: 3-30<br>Interquartile interval: 4.5-12.3                   |
| Number of ICU nurses                        | Median: 26<br>Interval: 10-76<br>Interquartile interval: 19-35                      |
| Patient-to-nurse ratio                      | Median: 2.2:1<br>Interval: 2.9:1 to 1.3:1<br>Interquartile interval: 2.5:1 to 1.9:1 |

4

5

6

7

8

9

10

11

12

13

14

15

16

17

18

19

20

21

22

23

24

25

1 Out of 431 enrolled participants, 426 (98.8%) responded. Five nurses refused to return the  
2 questionnaire. The study population was a young population, with the median age 25 years old,  
3 interquartile range 19 to 52 years old and female nurses accounted the major part (88.5%). Sixty-  
4 eight nurses (16.0%) were found to have a high degree of burnout, earning high EE and DP scores  
5 together with a low PA score. The proportion difference with statistical significance was only found  
6 in the group defined according to the years of experience as a registered nurse. About one quarter  
7 of those nurses that had been working as a registered nurse for 5 to 10 years had a high degree of  
8 burnout ( $P=0.02$ ) (Table 2).

9 When evaluated in each EE, DP and PA subscale, 184, 111 and 177 nurses stayed at the high  
10 level of burnout, respectively. Thus the most pronounced symptoms of burnout were emotional  
11 exhaustion and personal accomplishment. Among all the studied variables, the statistical  
12 significance was found for the DP scores among the nurses that with different education level,  
13 nurses that hold a junior college diploma were with a higher DP score when compared with the  
14 other two counterparts ( $P=0.04$ ) (Table 2).

**Table 2 Prevalence of emotional exhaustion (EE), depersonalization (DP) and personal accomplishment (PA) related to sociodemographic characteristics in 426 ICU nurses in Liaoning province, China**

| Variables                                                                                  | Number (%)   | Number of nurses having a high degree of burnout | EE          |     |          | DP   |           |     | PA       |      |             |     |          |      |
|--------------------------------------------------------------------------------------------|--------------|--------------------------------------------------|-------------|-----|----------|------|-----------|-----|----------|------|-------------|-----|----------|------|
|                                                                                            |              |                                                  | Mean±SD     | Low | Moderate | High | Mean      | Low | Moderate | High | Mean        | Low | Moderate | High |
|                                                                                            |              | 68                                               | 24.55±12.36 | 149 | 93       | 184  | 7.05±6.50 | 214 | 101      | 111  | 35.08±9.36  | 154 | 95       | 177  |
| <b>Gender</b>                                                                              |              |                                                  |             |     |          |      |           |     |          |      |             |     |          |      |
| Female                                                                                     | 377 (88.5%)  | 59                                               | 24.49±12.58 | 136 | 80       | 161  | 6.97±6.55 | 194 | 86       | 97   | 35.14±9.62  | 143 | 79       | 155  |
| Male                                                                                       | 49 (11.5%)   | 9                                                | 25.06±4.53  | 13  | 13       | 23   | 7.65±6.18 | 20  | 15       | 14   | 34.69±7.12  | 11  | 16       | 22   |
| <i>P</i> value                                                                             |              | 0.63                                             | 0.73        |     | 0.32     |      | 0.49      |     | 0.25     |      | 0.70        |     | 0.16     |      |
| <b>Age</b> (years, Median, 25 yrs; interval, 19-52 yrs; interquartile interval, 23-28 yrs) |              |                                                  |             |     |          |      |           |     |          |      |             |     |          |      |
| <30                                                                                        | 357 (83.8%)  | 56                                               | 24.61±12.29 | 123 | 81       | 153  | 7.18±6.45 | 174 | 86       | 97   | 34.91±9.22  | 123 | 84       | 150  |
| 30-40                                                                                      | 62 (14.6%)   | 11                                               | 24.29±12.84 | 24  | 10       | 28   | 6.50±6.76 | 35  | 14       | 13   | 35.79±10.36 | 28  | 9        | 25   |
| >40                                                                                        | 7 (1.6%)     | 1                                                | 24.14±13.50 | 2   | 2        | 3    | 5.14±5.90 | 5   | 1        | 1    | 37.71±7.68  | 3   | 2        | 2    |
| <i>P</i> value                                                                             |              | 0.91                                             | 0.98        |     | 0.98     |      | 0.55      |     | 0.27     |      | 0.60        |     | 0.51     |      |
| <b>Highest level of nurse education</b>                                                    |              |                                                  |             |     |          |      |           |     |          |      |             |     |          |      |
| Secondary nursing school                                                                   | 57 (13.4 %)  | 7                                                | 24.98±12.98 | 19  | 13       | 25   | 6.49±5.90 | 29  | 15       | 13   | 34.00±10.02 | 17  | 12       | 28   |
| Junior college                                                                             | 219 (51.4 %) | 40                                               | 25.04±12.05 | 73  | 47       | 99   | 7.81±6.90 | 101 | 54       | 64   | 34.68±8.97  | 71  | 56       | 92   |
| Bachelor and Master                                                                        | 150 (35.2%)  | 21                                               | 23.68±12.61 | 57  | 33       | 60   | 6.15±6.00 | 84  | 32       | 34   | 36.08±9.64  | 66  | 27       | 57   |
| <i>P</i> value                                                                             |              | 0.39                                             | 0.56        |     | 0.47     |      | 0.04      |     | 0.15     |      | 0.24        |     | 0.10     |      |
| <b>Job rank</b>                                                                            |              |                                                  |             |     |          |      |           |     |          |      |             |     |          |      |
| Nurse or nurse student                                                                     | 288 (67.6%)  | 40                                               | 24.29±11.97 | 100 | 66       | 122  | 7.01±6.33 | 143 | 73       | 72   | 35.20±8.83  | 104 | 67       | 117  |
| Nurse Practitioner                                                                         | 95 (22.3%)   | 22                                               | 25.51±12.48 | 31  | 23       | 41   | 7.51±7.11 | 47  | 18       | 30   | 34.18±10.04 | 28  | 23       | 44   |
| Nurse-in-charge and higher                                                                 | 43 (10.1%)   | 6                                                | 24.19±14.72 | 18  | 4        | 21   | 6.30±6.32 | 24  | 10       | 9    | 36.30±11.23 | 22  | 5        | 16   |
| <i>P</i> value                                                                             |              | 0.09                                             | 0.70        |     | 0.96     |      | 0.59      |     | 0.59     |      | 0.44        |     | 0.17     |      |
| <b>Marital status</b>                                                                      |              |                                                  |             |     |          |      |           |     |          |      |             |     |          |      |
| Unmarried                                                                                  | 277 (65.0%)  | 38                                               | 24.35±12.48 | 99  | 60       | 118  | 6.96±6.46 | 140 | 68       | 69   | 35.12±9.20  | 99  | 67       | 111  |

|                                                                                                                       |                |      |             |     |      |     |           |     |      |    |             |     |      |     |
|-----------------------------------------------------------------------------------------------------------------------|----------------|------|-------------|-----|------|-----|-----------|-----|------|----|-------------|-----|------|-----|
| Married                                                                                                               | 149<br>(35.0%) | 30   | 24.93±12.17 | 50  | 33   | 66  | 7.21±6.59 | 74  | 33   | 42 | 35.02±9.70  | 55  | 28   | 66  |
| <i>P</i> value                                                                                                        |                | 0.08 | 0.65        |     | 0.67 |     | 0.70      |     | 0.67 |    | 0.92        |     | 0.71 |     |
| <b>Years of experience as a registered nurse</b> (Median, 3 yrs; interval, 0-32 yrs; interquartile interval, 3-7 yrs) |                |      |             |     |      |     |           |     |      |    |             |     |      |     |
| <5                                                                                                                    | 268<br>(62.9%) | 33   | 23.54±12.10 | 102 | 59   | 107 | 6.90±6.40 | 137 | 66   | 65 | 35.43±9.21  | 99  | 61   | 108 |
| 5-10                                                                                                                  | 107<br>(25.1%) | 27   | 27.38±12.33 | 29  | 24   | 54  | 7.99±6.99 | 47  | 23   | 37 | 33.58±8.95  | 30  | 27   | 50  |
| 11-19                                                                                                                 | 39<br>(9.2%)   | 6    | 23.87±13.52 | 13  | 8    | 18  | 5.62±5.64 | 23  | 9    | 7  | 36.15±11.22 | 19  | 5    | 15  |
| 20 or more                                                                                                            | 12<br>(2.8%)   | 2    | 24.00±12.15 | 5   | 2    | 5   | 6.50±6.36 | 7   | 3    | 2  | 37.33±9.37  | 6   | 2    | 4   |
| <i>P</i> value                                                                                                        |                | 0.02 | 0.06        |     | 0.19 |     | 0.23      |     | 0.15 |    | 0.23        |     | 0.22 |     |
| <b>Years of experience as an ICU nurse</b> (Median, 2 yrs; interval, 0-20 yrs; interquartile interval, 1-4 yrs)       |                |      |             |     |      |     |           |     |      |    |             |     |      |     |
| <5                                                                                                                    | 332<br>(77.9%) | 46   | 23.89±12.07 | 123 | 73   | 136 | 6.84±6.35 | 169 | 82   | 81 | 35.32±9.19  | 121 | 77   | 134 |
| 5-10                                                                                                                  | 82<br>(19.2%)  | 20   | 27.38±13.44 | 22  | 18   | 42  | 7.83±7.18 | 40  | 14   | 28 | 33.65±9.92  | 26  | 17   | 39  |
| 11-19                                                                                                                 | 10<br>(2.3%)   | 2    | 24.00±11.08 | 3   | 2    | 5   | 7.70±6.15 | 4   | 4    | 2  | 37.20±10.22 | 5   | 1    | 4   |
| 20 or more                                                                                                            | 2<br>(0.5%)    | 0    | 21.50±12.02 | 1   | 0    | 1   | 5.50±3.54 | 1   | 1    | 0  | 44.00±4.24  | 2   | 0    | 0   |
| <i>P</i> value                                                                                                        |                | 0.11 | 0.15        |     | 0.29 |     | 0.63      |     | 0.76 |    | 0.22        |     | 0.23 |     |

SD: Standard deviation. Percentages may not add up to 100% due to rounding.

## 1 DISCUSSION

2 This multi-center study revealed that as many as 16% of the ICU nursing team  
3 showed a high level of burnout in all three dimensions. For each subscale, the  
4 highest proportion of high-degree (43.2%) was found in the emotional exhaustion  
5 subscale, followed by 41.2% in personal accomplishment subscale and 26.1% in  
6 depersonalization subscale. Given the fact that the well-being of the ICU nurses is of  
7 critical importance to the quality of critically ill patients who are likely to benefit from  
8 ICU care, this kind of investigation into the burnout level of this population could  
9 catch more attention to ICU caregivers.

10 In Liaoning, China, there are still no complete epidemiologic data to state the actual,  
11 overall situation regarding burnout status among ICU nurses, to the best of our  
12 knowledge, this is the first burnout study among Liaoning ICU nurses. Most of the  
13 respondents indicated that the investigation from nurses' perspective might  
14 contribute to not only the mutual understanding between nurse leaders, ICU  
15 managers and nurses, but also their greater self-awareness of burnout. This study  
16 strengthened the power of the Critical Care Special Committee nested in Nursing  
17 Association of China Liaoning Branch and added an appeal to the nurse students to  
18 work in ICU. When focusing on the prevalence and the prevention of occupational  
19 burnout in order to develop effective interventions, a few characteristics should be  
20 taken into account. There is a linear relationship between emotional exhaustion and  
21 depersonalization, both subscales, emotional exhaustion and depersonalization can  
22 discriminate between burned out and non-burned out employees.[17] On the other  
23 hand, low levels of personal accomplishment and high degree of depersonalization in  
24 the burnout scores may actually be protective against stress.[18] Moreover, high  
25 levels of emotional exhaustion cause stress and that stress causes high levels of  
26 emotional exhaustion. In addition, depersonalization may reduce stress, whereas  
27 high degrees of personal accomplishment may increase stress levels.[19]

1  
2  
3 1 The present study has its limitations. Firstly, out of the 17 invited ICUs, three ICUs  
4  
5 2 were excluded, one ICU was at the rearrangement stage due to the decoration  
6  
7 3 during the study period, one ICU was at the beginning stage of being short of ICU  
8  
9 4 nurses that the patient-to-nurse ratio was distinct from others, and one ICU was  
10  
11 5 open-type ICU that the management mode was distinct from the other fourteen  
12  
13 6 included ICUs. Although the rate of response to the questionnaire was excellent, five  
14  
15 7 nurses refused to return the questionnaire after the introduction of the study  
16  
17 8 objectives. This refusal might have been related to that they were already exhausted  
18  
19 9 at that time due to various reasons, such as, heavy work load. Secondly, the  
20  
21 10 researcher in each participating ICU was the ICU head nurse, and to some extent,  
22  
23 11 the firsthand acquaintance might affect the information those nurses provided. We  
24  
25 12 tried to minimize the kind of worry, the anonymous questionnaire was a structured  
26  
27 13 questionnaire, the participants only needed to put a tick opposite each choice, the  
28  
29 14 pen they used was also provided by the stationery office of each hospital. Thus, it  
30  
31 15 was difficult to trace the participant information according to these tick marks. Thirdly,  
32  
33 16 the number of nurses in each participating hospital was more than one thousand, the  
34  
35 17 demographic data of total registered nurses in the hospital was available for 3  
36  
37 18 hospitals, thus those data for the ICU nurses from those 3 nested ICUs could be  
38  
39 19 compared to the total registered nurses of the hospital, and no statistical differences  
40  
41 20 were found. In addition, there may have been important differences of various clinical  
42  
43 21 settings, for example, work climate, the characteristics of the patients, work load,  
44  
45 22 relationship between doctors and nurses, institutional policy, coping strategies and  
46  
47 23 etc, the results are not generalizable to all Chinese ICU nurses as a whole.

48  
49  
50 24 This proportion of burnout (16% in all 3 dimensions, and 26.1% to 43.2% in each  
51  
52 25 single subscale) among Liaoning ICU nurses that experienced a high degree of  
53  
54 26 burnout is in the range of several recently published studies that reported the  
55  
56 27 distribution of high-level burnout among ICU nurses, around one-third of the ICU  
57  
58  
59  
60

1  
2  
3 1 nurses having a high level of burnout.[20-23] In 2005, a Maslach Burnout Inventory-  
4  
5 2 General Survey based investigation was conducted in a convenience sample of staff  
6  
7 3 nurses in Henan province in China.[24] In this study the participants were all females,  
8  
9 4 mean age was 29 years with a range from 18 to 60 years and 66% had experience in  
10  
11 5 nursing for 5 years or more. They focused on the nurses from provincial hospitals,  
12  
13 6 supported the view that nurses commonly experience burnout. The authors reported  
14  
15 7 that scores for burnout of surgical and medical nurses were statistically significantly  
16  
17 8 higher than those of other nurses, lower educational status was associated with  
18  
19 9 higher levels of burnout in young nurses. However, in the present study, the highest  
20  
21 10 proportion of the nurses experiencing high degree of burnout was found for the  
22  
23 11 nurses with 5 to 10 years' employment as a registered nurse. Around 11.5% of the  
24  
25 12 participants in our study were males, and 63% of the included ICU nurses had less  
26  
27 13 than 5 years of employment as a registered nurse. The differences between that  
28  
29 14 study and our study revealed that burnout was associated with demographic  
30  
31 15 characteristics, such as age, educational level, the kind of clinical setting and years  
32  
33 16 of employment as a nurse or an ICU nurse, cautions should be exercised when  
34  
35 17 comparing the results originated from different studies.[24]

36  
37  
38 18 This result might help the ICU head nurse to take some actions to explore the  
39  
40 19 feelings, concerns and difficulties of ICU nurses and explore possible solutions and  
41  
42 20 interventions correspondingly.[25,26] High-risk factors[27] and possible protective  
43  
44 21 factors[28,29] that associated with burnout level in Liaoning ICU nurses, such as  
45  
46 22 work environment, job satisfaction, social support and coping strategies will be  
47  
48 23 explored in the next stage of the SUBLIN study.

49  
50 24 **Appendix**-Study Team (SUBLIN Study), Chun-Mei Gu, Li-Huan Hu, Hong-Fei Li, Li-  
51  
52 25 Hong Liu, Long-Feng Sun, Xuan Wang, Xiao-Jiang Yu, Jun-Li Zhang, Li-Hong Zhang,  
53  
54 26 Shen-Ping Zhang, Wen-Jing Zhao, Li-Yuan Zheng.

55  
56  
57 27



1  
2  
3 **1 Acknowledgements**  
4

5 2 This project was made possible by the efforts of 14 collaborative ICUs from 10  
6  
7 3 hospitals and by the enthusiastic support and active participation of the nurses.  
8

9  
10 **4 Contributors**

11 5 X CZ conceived of the study, participated in its design and coordination. XZ and PG  
12 6 had full access to all of the data in the study, took responsibility for the integrity of the  
13 7 data and the accuracy of the data analysis and drafted the manuscript. DSH  
14 8 participated in its design, analysis and coordination, and helped to draft the  
15 9 manuscript. All authors reviewed and approved the final manuscript.  
16  
17

18  
19  
20  
21  
22 **10 Funding**  
23

24 11 This work was supported by the Natural Science Foundation of Liaoning Province,  
25 12 China, grant number 201320014. This work was also a part of the programme for  
26 13 Elaborate Course of Epidemiology and Key Disciplines Construction supported by  
27 14 China Medical University, grant number CMU Internal Circular-J-[2010]-16-31 and  
28 15 Internal Circular-F-[2011]-5).  
29  
30  
31  
32  
33  
34

35 **16 Competing interests**  
36

37 17 None  
38

39 **18 Data Sharing Statement**  
40

41 19 No additional data available  
42  
43  
44  
45  
46  
47  
48  
49  
50  
51  
52  
53  
54  
55  
56  
57  
58  
59  
60

1

2

3

4 **REFERENCES**

5 1. Nardi DA, Gyurko CC. The global nursing faculty shortage: status and solutions for  
6 change. *J Nurs Scholarsh* 2013;**45**:317-26.

7 2. Reinert J, Bigelow A, Kautz DD. Overcoming nursing faculty shortages and  
8 bridging the gap between education and practice. *J Nurses Staff Dev* 2012;**28**:216-  
9 8.

10 3. Ahmed SM, Hossain MA, Rajachowdhury AM, Bhuiya AU. The health workforce  
11 crisis in Bangladesh: shortage, inappropriate skill-mix and inequitable distribution.  
12 *Hum Resour Health* 2011;**9**:3.

13 4. Farsi Z, Dehghan-Nayeri N, Negarandeh R, *et al*. Nursing profession in Iran: an  
14 overview of opportunities and challenges. *Jpn J Nurs Sci* 2010;**7**:9-18.

15 5. Duvall JJ, Andrews DR. Using a structured review of the literature to identify key  
16 factors associated with the current nursing shortage. *J Prof Nurs* 2010;**26**:309-17.

17 6. Wynn SD. Addressing the nursing workforce shortage: veterans as mental health  
18 nurses. *J Psychosoc Nurs Ment Health Serv* 2013;**51**:3-4.

19 7. Chan ZC, Tam WS, Lung MK, *et al*. A systematic literature review of nurse  
20 shortage and the intention to leave. *J Nurs Manag* 2013;**21**:605-13.

21 8. Hsiao WC. When incentives and professionalism collide. *Health Aff (Millwood)*  
22 2008;**27**:949-51.

23 9. Ma J, Lu M, Quan H. From a national, centrally planned health system to a system  
24 based on the market: lessons from China. *Health Aff (Millwood)* 2008;**27**:937-48.

25 10. Yu D, Li T. Facing up to the threat in China. *Lancet* 2010;**376**:1823-4.

- 1  
2  
3 11. Wagstaff A, Yip W, Lindelow M, *et al.* China's health system and its reform: a  
4  
5 2 review of recent studies. *Health Econ* 2009;**18**:S7-23.  
6  
7 12. Du B, Xi X, Chen D, Peng J, *et al.* Clinical review: critical care medicine in  
8  
9 4 mainland China. *Crit Care* 2010;**14**:206.  
10  
11 13. Maslach C, Jackson SE. The measurement of experienced burnout. *J Occup*  
12  
13 6 *Behav* 1981;**2**:99-113.  
14  
15 14. Ye ZH, Luo H, Jiang HL. Diagnostic standard and norms of Maslach Burnout  
16  
17 7 Inventory for nurses in Hangzhou. *Chinese Journal of Nursing* 2008;**43**:207-9. (in  
18  
19 8 Chinese)  
20  
21 9  
22 10 15. Schaufeli WB, Van Dierendonck D. A cautionary note about the cross-national  
23  
24 11 and clinical validity of cut-off points for the Maslach Burnout Inventory. *Psychol Rep*  
25  
26 12 1995;**76**:1083-90.  
27  
28 13 16. Wu J, Dai Y, Ning Y, *et al.* Study of the status and correlative factors of job  
29  
30 14 burnout among nurses in Xinjiang. *Journal of Nursing Administration* 2011;**11**:7-9.  
31  
32 15 (in Chinese)  
33  
34 16 17. Schaufeli WB, Bakker AB, Hoogduin K, *et al.* on the clinical validity of the  
35  
36 17 maslach burnout inventory and the burnout measure. *Psychol Health* 2001;**16**:565-  
37  
38 18 82.  
39  
40 19 18. Onder C, Basim N. Examination of developmental models of occupational  
41  
42 20 burnout using burnout profiles of nurses. *J Adv Nurs* 2008;**64**:514-23.  
43  
44 21 19. McManus IC, Winder BC, Gordon D. The causal links between stress and  
45  
46 22 burnout in a longitudinal study of UK doctors. *Lancet* 2002;**359**:2089-90.  
47  
48 23 20. Teixeira C, Ribeiro O, Fonseca AM, *et al.* Burnout in intensive care units - a  
49  
50 24 consideration of the possible prevalence and frequency of new risk factors: a  
51  
52 25 descriptive correlational multicentre study. *BMC Anesthesiol* 2013;**13**:38.  
53  
54  
55  
56  
57  
58  
59  
60

- 1  
2  
3 1 21. Poncet MC, Toullic P, Papazian L, *et al.* Burnout syndrome in critical care nursing  
4  
5 2 staff. *Am J Respir Crit Care Med* 2007;**175**:698-704.  
6  
7 3 22. Verdon M, Merlani P, Perneger T, *et al.* Burnout in a surgical ICU team. *Intensive*  
8  
9 4 *Care Med* 2008;**34**:152-6.  
10  
11 5 23. Liu K, You LM, Chen SX, *et al.* The relationship between hospital work  
12  
13 6 environment and nurse outcomes in Guangdong, China: a nurse questionnaire  
14  
15 7 survey. *J Clin Nurs* 2012;**21**:1476-85.  
16  
17  
18 8 24. Wu S, Zhu W, Wang Z, *et al.* Relationship between burnout and occupational  
19  
20 9 stress among nurses in China. *J Adv Nurs* 2007;**59**:233-9.  
21  
22 10 25. Yao Y, Yao W, Wang W, *et al.* Investigation of risk factors of psychological  
23  
24 11 acceptance and burnout syndrome among nurses in China. *Int J Nurs Pract*  
25  
26 12 2013;**19**:530-8.  
27  
28  
29 13 26. Lei W, Youn Hee K, Dong W. A review of research and strategies for burnout  
30  
31 14 among Chinese nurses. *Br J Nurs* 2010;**19**:844-50.  
32  
33 15 27. Karanikola MN, Papathanassoglou ED, Mpouzika M, *et al.* Burnout syndrome  
34  
35 16 indices in Greek intensive care nursing personnel. *Dimens Crit Care Nurs*  
36  
37 17 2012;**31**:94-101.  
38  
39 18 28. Quenot JP, Rigaud JP, Prin S, *et al.* Suffering among carers working in critical  
40  
41 19 care can be reduced by an intensive communication strategy on end-of-life  
42  
43 20 practices. *Intensive Care Med* 2012;**38**:55-61.  
44  
45 21 29. Beanland C. Tackling the workforce shortage. *Aust Nurs J* 2013;**20**:47-8.  
46  
47  
48 22  
49  
50 23  
51  
52 24  
53  
54 25  
55  
56 26  
57  
58  
59  
60

1  
2  
3 1 **Figure 1 Framework of Study to Understand Burnout among Liaoning ICU**  
4  
5 2 **Nurses, the SUBLIN study**  
6  
7 3  
8  
9  
10  
11  
12  
13  
14  
15  
16  
17  
18  
19  
20  
21  
22  
23  
24  
25  
26  
27  
28  
29  
30  
31  
32  
33  
34  
35  
36  
37  
38  
39  
40  
41  
42  
43  
44  
45  
46  
47  
48  
49  
50  
51  
52  
53  
54  
55  
56  
57  
58  
59  
60

For peer review only

1  
2  
3  
4  
5  
6  
7  
8  
9  
10  
11  
12  
13  
14  
15  
16  
17  
18  
19  
20  
21  
22  
23  
24  
25  
26  
27  
28  
29  
30  
31  
32  
33  
34  
35  
36  
37  
38  
39  
40  
41  
42  
43  
44  
45  
46  
47  
48  
49  
50  
51  
52  
53  
54  
55  
56  
57  
58  
59  
60

1 **Job burnout among critical care nurses from 14 adult ICUs in northeastern China: a**  
2 **cross-sectional survey**

3 Xiao-Chun Zhang<sup>1</sup>, De-Sheng Huang<sup>2</sup>, Peng Guan<sup>3</sup>

4 <sup>1</sup> Cardiac Critical Care Unit, Department of Cardiology, The First Affiliated Hospital, China Medical  
5 University, Shenyang 110001, China.

6 <sup>2</sup> Department of Mathematics, College of Basic Medical Sciences, China Medical University,  
7 Shenyang 110001, China.

8 <sup>3</sup> Department of Epidemiology, School of Public Health, China Medical University, Shenyang  
9 110001, China.

10

11 **§Corresponding author:** Peng Guan, Department of Epidemiology, School of Public Health,  
12 China Medical University, Shenyang 110001, China; Phone:+86-24-23256666 ext. 5401; Fax: +86-  
13 24-23258982; E-mail: pguan@mail.cmu.edu.cn

14

15 **Key words:** Burnout, Intensive Care Units, nurses

16 **Word count (main text):** 2670 words

1  
2  
3  
4  
5  
6  
7  
8  
9  
10  
11  
12  
13  
14  
15  
16  
17  
18  
19  
20  
21  
22  
23  
24  
25  
26  
27  
28  
29  
30  
31  
32  
33  
34  
35  
36  
37  
38  
39  
40  
41  
42  
43  
44  
45  
46  
47  
48  
49  
50  
51  
52  
53  
54  
55  
56  
57  
58  
59  
60

## 1 ABSTRACT

2 **Objectives** The shortage of qualified nurses is one of the critical challenges in the field of  
3 healthcare. Among the contributing factors, job burnout has been indicated as a risk factor of the  
4 intention to leave. The purpose of this study was to provide a better understanding of the local  
5 status and reference data for coping strategies of ICU nurse burnout among Liaoning ICU Nurses.

6 **Design** Observational study.

7 **Setting** Seventeen ICUs from 10 tertiary level hospitals in Liaoning, China.

8 **Participants** Four hundred and thirty-one ICU nurses from 14 ICUs nested in 10 tertiary level  
9 hospitals in Liaoning, China were invited during October and November 2010.

10 **Primary measures** Burnout was measured with the 22-item Chinese version of Maslach Burnout  
11 Inventory-Health Service Survey (MBI-HSS) questionnaires.

12 **Results** Fourteen ICUs responded actively and were included, the response rate was 87.7%  
13 among the 486 invited participants from these 17 ICUs. The study population was a young  
14 population, with the median age 25 years old, interquartile range 19 to 52 years old and female  
15 nurses accounted the major part (88.5%). Sixty-eight nurses (16.0%) were found to have a high  
16 degree of burnout, earning high emotional exhaustion and depersonalization scores together with a  
17 low personal accomplishment score.

18 **Conclusions** The present study indicated the moderate distribution of burnout among ICU nurses  
19 in Liaoning, China. The investigation into the burnout level of this population could catch more  
20 attention to ICU caregivers.  
21

1  
2  
3  
4  
5  
6  
7  
8  
9  
10  
11  
12  
13  
14  
15  
16  
17  
18  
19  
20  
21  
22  
23  
24  
25  
26  
27  
28  
29  
30  
31  
32  
33  
34  
35  
36  
37  
38  
39  
40  
41  
42  
43  
44  
45  
46  
47  
48  
49  
50  
51  
52  
53  
54  
55  
56  
57  
58  
59  
60

## 1 Strengths and limitations of this study

- 2 ● This is the first study to state the actual, overall situation regarding burnout status among  
3 ICU nurses in Liaoning, China, to the best of the authors' knowledge.
- 4 ● This multi-center 'Study to Understand Burnout among Liaoning ICU Nurses' revealed that  
5 as many as 16% of the [responding ICU nurses](#) showed a high level of burnout in all  
6 emotional exhaustion (EE), depersonalization (DP) and personal accomplishment (PA)  
7 dimensions.
- 8 ● There may have been important differences of various clinical settings, for example, work  
9 climate, the characteristics of the patients, work load, relationship between doctors and  
10 nurses, institutional policy, coping strategies [etc.](#), the results are not generalizable to all  
11 Chinese ICU nurses as a whole.
- 12 ● The researcher in each participating ICU was the ICU head nurse, and to some extent, the  
13 firsthand acquaintance might affect the information those nurses provided.



## 1 INTRODUCTION

2 Around the world, the shortage of qualified nurses is one of the critical challenges in the field of  
3 healthcare.[1-3] This shortage is a multidimensional phenomenon,[4,5] and can be attributed to low  
4 job satisfaction, lack of managerial support, poor career opportunities and etc.[6,7] Among the  
5 contributing factors, job burnout has been indicated as a risk factor of the intention to leave.

6 According to the nature, nursing is a stressful occupation due to the direct exposure to various  
7 kinds of working environments and conditions which include anxiety and depression. In China, the  
8 Chinese public is greatly dissatisfied with the high cost and low quality of health care.[8-11]

9 The study communities, Intensive Care Units (ICU) nurses were selected for three main reasons.  
10 First, as just described, with the background of China public's dissatisfaction and the high costs of  
11 intensive care, there is tense relationship between doctors and patients, an online survey revealed  
12 that 66% of 14,577 doctors said that their hospitals encountered one to three medical disputes per  
13 month.[10] More efforts have been made to improve quality of life for patients, while the care  
14 providers deserve equal attention. Second, noises, light and the radiation from those monitoring  
15 equipment that run all day long pose direct impact to the ICU nurses. Third, critical care medicine  
16 was accredited as an independent subspecialty of clinical medicine by Ministry of Health of the  
17 People's Republic of China just in January 2009. Critical care courses and educational programs  
18 taught at hospitals and universities with various kinds of duration and clinical practice are  
19 established to meet the crying need of training during the infancy stage of critical care research in  
20 mainland China.[12] Those in-service ICU nurses are the main part of supporting faculty for those  
21 training. Clear picture about the burnout status can provide some background information for the  
22 target solutions.

23 To provide a better understanding of the local status and reference data for coping strategies of  
24 ICU nurse burnout, the present cross-sectional study, 'Study to Understand Burnout among  
25 Liaoning ICU Nurses (the SUBLIN study)', was conducted to report findings.

## 26 METHODS

### 27 Study units and subjects

1 A cross-sectional survey was conducted during October and November 2010 in Liaoning province,  
2 northeastern China. The 486 ICU nurses that work in the 17 intensive care units from ten tertiary  
3 level hospitals were selected as the target population. The principal investigator and co-principal  
4 investigators contacted the head nurse of each participating ICUs via meeting or telephone to  
5 share the project objectives and collect the feedback on the questionnaire to be used. After the  
6 questionnaire approved by the project core team member and the head nurses of included ICUs,  
7 those head nurses assisted in contacting the nurse staff in first-line clinical positions who agreed to  
8 participate and arranging the schedule that the nurse could be available. The self-administered  
9 anonymous questionnaire addressed demographic data and burnout was adopted during the  
10 interview. Demographic information included age, gender, education level, marital status,  
11 professional title, the entire period of employment as a nurse and an ICU nurse. All the ICU nurses  
12 were in a sufficiently good physical and mental condition to provide reliable answers. The  
13 procedures were in accordance with the Declaration of Helsinki and the study was approved by the  
14 Ethical Committee of China Medical University. And to remove the participants' worries about that  
15 the handwriting on the anonymous questionnaires could be possibly tracked according to their  
16 signatures on the consent letter, all the participants provided oral informed consent only. After the  
17 head nurse informed the eligible participants about the survey, the head nurse in each ICU also  
18 explained that the participation was purely voluntary and the results that based on the collected  
19 questionnaire data would be published or presented in an academic symposium on ICU nursing.  
20 The head nurse designated at least 2 people to collect the completed questionnaires and check  
21 the integrity. The participating nurses were asked to finish the questionnaire within 5 days and they  
22 could complete the questionnaire either at home or on the working place.

23 The study population was a dynamic population, some events, such as sick leave, maternity leave  
24 or duty travel happened occasionally or frequently. After the negotiation between the principal  
25 investigator and the head nurse of each participating ICU, the survey schedule was fixed, and the  
26 available nurse participants were defined by the head nurse of each ICU.

### 27 **Measurement of burnout**

1 Burnout was measured with the self-reporting Chinese version of anonymous Maslach Burnout  
2 Inventory-Human Services Survey (MBI-HSS) questionnaires. It consists of three dimensions:  
3 emotional exhaustion (EE), depersonalization (DP) and personal accomplishment (PA). The items  
4 in the emotional exhaustion subscale describe the feelings of being emotionally overextended and  
5 exhausted by one's work, the items in the Depersonalization subscale describe an unfeeling and  
6 impersonal response towards recipients of one's care or service, and the items in the personal  
7 accomplishment subscale describe feelings of competence and successful achievement in one's  
8 work with people.[13] The Maslach Burnout Inventory-Human Services Survey was translated into  
9 Chinese by Samantha Mei-Che Peng from The Hong Kong Polytechnic University, its Cronbach's  
10  $\alpha = 0.73$  for the whole questionnaire, 0.86, 0.76 and 0.76 for the three subscales.[14] The total  
11 scale consists of 22 items, among which the EE dimension is measured by nine items, the DP  
12 dimension is measured by five items, and the measurement of PE dimension is based on eight  
13 items. Each of the items is scored on a Likert scale from 0 to 6. The scores are defined according  
14 to how often the statement is experienced, from 'never' (0) to 'every day' (6). Higher scores on the  
15 EE and DP dimensions and lower scores on the PA dimension indicate higher level of burnout. It  
16 has been indicated that cut-off points should be nation-specific and clinically derived to respond to  
17 cultural values, traditional gender roles and others.[15] Cut-off criteria of the MBI-HSS-C in the  
18 present study was discussed and determined by the project core team member, EE: low, less than  
19 19, moderate, 19-26, high more than 26, DP: low: less than 6, moderate, 6-9, high, more than 9,  
20 and PA: low, more than 39, moderate 34-39, high, less than 34.[16] Given the fact that the  
21 definition of burnout is still controversial, in the present study individuals with high EE scores and  
22 DP scores together with a low PA score were identified as having a high degree of burnout,[13]  
23 and the distribution data in each subscale was also provided.

#### 24 **Statistical analysis**

25 In China, most of the nurses are females, male nurses, as the minority part, may stay at different  
26 level of job burnout when being compared with the counterpart female nurses. Thus, the subgroup  
27 analysis was conducted to test the differences between male nurses and females. There is  
28 increasing emphasis on higher entrance requirements of ICU nurses, and the amount of nurses'

1 salary are closely related to the job rank. And the job rank of the nurses highly rely on the  
2 education level, the length of service, the quantity and quality of scientific output, for example, the  
3 number of first-authored publications, thus the education level, job rank, years of employment as a  
4 registered nurse, and years of employment as an ICU nurse were considered for subgroup  
5 analysis. Age group was classified as <30, 30 to 40 and >40 years. Years of experience as a  
6 registered nurse was grouped as <5, 5-10, 11-19 and more than 20 years. Around 30% of the  
7 study population held a junior college diploma and 45% of the study population graduated from  
8 secondary nursing school when first employed as a nurse, part of the nurses attended part-time  
9 courses to gain a higher degree. Detailed questions on education level could disclose too much  
10 personal information, so only the highest level of education was collected in the present survey to  
11 confirm the survey was anonymous. The marital status may also have an impact on the level of  
12 burnout, stratified analysis on marital status was conducted. Differences of MBI scores for  
13 demographics and years of experience as a registered nurse or an ICU nurse were tested by the  
14 Student t-test and ANOVA. For ordinal data, Mann-Whitney U test was adopted for comparison  
15 between two groups and the Kruskal-Wallis test for comparison between more than two groups.  
16 The proportion of the nurses having a high degree of burnout in each subgroup was tested by Chi-  
17 square test. The Student t-test, ANOVA, Mann-Whitney U test and Kruskal-Wallis test were done  
18 using SPSS software (SPSS 12.0 for windows, SPSS Inc., Chicago, IL, USA). The Chi-square test  
19 was performed with the software Epi Info™ 3.4.3 (Version 3.4.3 Centers for Disease Control and  
20 Prevention, Atlanta, GA, USA). All the P values were two-sided with the P-value less than 0.05  
21 considered as statistically significant.

## 22 RESULTS

23 Among the invited 17 ICUs, fourteen ICUs from ten tertiary level hospitals responded actively and  
24 were included in the present study (Figure 1). For those uninvolved three ICUs, one ICU (25  
25 employed nurses) was at the rearrangement stage due to the decoration during the study period,  
26 one ICU (fourteen employed nurses) was at the beginning stage of being short of ICU nurses, and  
27 one ICU (sixteen employed nurses) was open-type ICU that the management mode was distinct  
28 from the other ICUs. All the included ICUs were closed-type ICU with the available 24-hour a day

1 presence of junior or intermediate intensivist, and all the nurses' working-shift was 12-hour shift.  
2  
3  
4 2 The characteristics of the 14 included ICUs are shown in Table 1. For the 10 hospitals, half were  
5  
6 3 university and university affiliated hospitals, 3 hospitals with more than 2,000 beds and the biggest  
7  
8 4 one with 4,300 beds. The number of admissions in each included ICUs varied from 120 to 890 per  
9  
10 5 year.

11  
12 Figure 1 here

13  
14 7 **Figure 1 Framework of Study to Understand Burnout among Liaoning ICU Nurses, the**  
15  
16 8 **SUBLIN study**  
17  
18  
19  
20  
21  
22  
23  
24  
25  
26  
27  
28  
29  
30  
31  
32  
33  
34  
35  
36  
37  
38  
39  
40  
41  
42  
43  
44  
45  
46  
47  
48  
49  
50  
51  
52  
53  
54  
55  
56  
57  
58  
59  
60

1 **Table 1 Characteristics of 14 included Intensive Care Units in Liaoning province, China, the**

2 **SUBLIN study**

3

| Characteristics                             | Number (% or interquartile)                                                         |
|---------------------------------------------|-------------------------------------------------------------------------------------|
| Type of hospital                            |                                                                                     |
| University and University affiliated        | 5 (50%)                                                                             |
| Public                                      | 5 (50%)                                                                             |
| Number of Hospital beds (in 2009)           |                                                                                     |
| ≥ 1000                                      | 5 (50%, )                                                                           |
| < 1000                                      | 5 (50%)                                                                             |
| ICU treatment provision by patient category |                                                                                     |
| Medical                                     | 10 (71.4%)                                                                          |
| Surgical                                    | 4 (28.6%)                                                                           |
| Number of ICU beds                          | Median: 12<br>Interval: 6-28<br>Interquartile interval: 9-15                        |
| Number of ICU admissions per year           | Median: 300<br>Interval: 120-890<br>Interquartile interval: 165-600                 |
| ICU mortality in 2009 (%)                   | Median: 14.3%<br>Interval: 4.5%-21.0%<br>Interquartile interval: 9.2%-16.7%         |
| Average ICU length of stay (days)           | Median: 6.3<br>Interval: 3-30<br>Interquartile interval: 4.5-12.3                   |
| Number of ICU nurses                        | Median: 26<br>Interval: 10-76<br>Interquartile interval: 19-35                      |
| Patient-to-nurse ratio                      | Median: 2.2:1<br>Interval: 2.9:1 to 1.3:1<br>Interquartile interval: 2.5:1 to 1.9:1 |

4

5

6

7

8

9

10

11

12

13

14

15

16

17

18

19

20

21

22

23

24

1 Out of 431 enrolled participants, 426 (98.8%) responded. Five nurses refused to return the  
2 questionnaire. The study population was a young population, with the median age 25 years old,  
3 interquartile range 19 to 52 years old and female nurses accounted the major part (88.5%). Sixty-  
4 eight nurses (16.0%) were found to have a high degree of burnout, earning high EE and DP scores  
5 together with a low PA score. The proportion difference with statistical significance was only found  
6 in the group defined according to the years of experience as a registered nurse. About one quarter  
7 of those nurses that had been working as a registered nurse for 5 to 10 years had a high degree of  
8 burnout ( $P=0.02$ ) (Table 2).

9 When evaluated in each EE, DP and PA subscale, 184, 111 and 177 nurses stayed at the high  
10 level of burnout, respectively. Thus the most pronounced symptoms of burnout were emotional  
11 exhaustion and personal accomplishment. Among all the studied variables, the statistical  
12 significance was found for the DP scores among the nurses that with different education level,  
13 nurses that hold a junior college diploma were with a higher DP score when compared with the  
14 other two counterparts ( $P=0.04$ ) (Table 2).

**Table 2 Prevalence of emotional exhaustion (EE), depersonalization (DP) and personal accomplishment (PA) related to sociodemographic characteristics in 426 ICU nurses in Liaoning province, China**

| Variables                                                                                  | Number (%)   | Number of nurses having a high degree of burnout | EE          |     |          | DP   |           |     |          | PA   |             |     |          |      |
|--------------------------------------------------------------------------------------------|--------------|--------------------------------------------------|-------------|-----|----------|------|-----------|-----|----------|------|-------------|-----|----------|------|
|                                                                                            |              |                                                  | Mean±SD     | Low | Moderate | High | Mean      | Low | Moderate | High | Mean        | Low | Moderate | High |
|                                                                                            |              | 68                                               | 24.55±12.36 | 149 | 93       | 184  | 7.05±6.50 | 214 | 101      | 111  | 35.08±9.36  | 154 | 95       | 177  |
| <b>Gender</b>                                                                              |              |                                                  |             |     |          |      |           |     |          |      |             |     |          |      |
| Female                                                                                     | 377 (88.5%)  | 59                                               | 24.49±12.58 | 136 | 80       | 161  | 6.97±6.55 | 194 | 86       | 97   | 35.14±9.62  | 143 | 79       | 155  |
| Male                                                                                       | 49 (11.5%)   | 9                                                | 25.06±4.53  | 13  | 13       | 23   | 7.65±6.18 | 20  | 15       | 14   | 34.69±7.12  | 11  | 16       | 22   |
| <i>P</i> value                                                                             |              | 0.63                                             | 0.73        |     | 0.32     |      | 0.49      |     | 0.25     |      | 0.70        |     | 0.16     |      |
| <b>Age</b> (years, Median, 25 yrs; interval, 19-52 yrs; interquartile interval, 23-28 yrs) |              |                                                  |             |     |          |      |           |     |          |      |             |     |          |      |
| <30                                                                                        | 357 (83.8%)  | 56                                               | 24.61±12.29 | 123 | 81       | 153  | 7.18±6.45 | 174 | 86       | 97   | 34.91±9.22  | 123 | 84       | 150  |
| 30-40                                                                                      | 62 (14.6%)   | 11                                               | 24.29±12.84 | 24  | 10       | 28   | 6.50±6.76 | 35  | 14       | 13   | 35.79±10.36 | 28  | 9        | 25   |
| >40                                                                                        | 7 (1.6%)     | 1                                                | 24.14±13.50 | 2   | 2        | 3    | 5.14±5.90 | 5   | 1        | 1    | 37.71±7.68  | 3   | 2        | 2    |
| <i>P</i> value                                                                             |              | 0.91                                             | 0.98        |     | 0.98     |      | 0.55      |     | 0.27     |      | 0.60        |     | 0.51     |      |
| <b>Highest level of nurse education</b>                                                    |              |                                                  |             |     |          |      |           |     |          |      |             |     |          |      |
| Secondary nursing school                                                                   | 57 (13.4 %)  | 7                                                | 24.98±12.98 | 19  | 13       | 25   | 6.49±5.90 | 29  | 15       | 13   | 34.00±10.02 | 17  | 12       | 28   |
| Junior college                                                                             | 219 (51.4 %) | 40                                               | 25.04±12.05 | 73  | 47       | 99   | 7.81±6.90 | 101 | 54       | 64   | 34.68±8.97  | 71  | 56       | 92   |
| Bachelor and Master                                                                        | 150 (35.2%)  | 21                                               | 23.68±12.61 | 57  | 33       | 60   | 6.15±6.00 | 84  | 32       | 34   | 36.08±9.64  | 66  | 27       | 57   |
| <i>P</i> value                                                                             |              | 0.39                                             | 0.56        |     | 0.47     |      | 0.04      |     | 0.15     |      | 0.24        |     | 0.10     |      |
| <b>Job rank</b>                                                                            |              |                                                  |             |     |          |      |           |     |          |      |             |     |          |      |
| Nurse or nurse student                                                                     | 288 (67.6%)  | 40                                               | 24.29±11.97 | 100 | 66       | 122  | 7.01±6.33 | 143 | 73       | 72   | 35.20±8.83  | 104 | 67       | 117  |
| Nurse Practitioner                                                                         | 95 (22.3%)   | 22                                               | 25.51±12.48 | 31  | 23       | 41   | 7.51±7.11 | 47  | 18       | 30   | 34.18±10.04 | 28  | 23       | 44   |
| Nurse-in-charge and higher                                                                 | 43 (10.1%)   | 6                                                | 24.19±14.72 | 18  | 4        | 21   | 6.30±6.32 | 24  | 10       | 9    | 36.30±11.23 | 22  | 5        | 16   |
| <i>P</i> value                                                                             |              | 0.09                                             | 0.70        |     | 0.96     |      | 0.59      |     | 0.59     |      | 0.44        |     | 0.17     |      |
| <b>Marital status</b>                                                                      |              |                                                  |             |     |          |      |           |     |          |      |             |     |          |      |
| Unmarried                                                                                  | 277 (65.0%)  | 38                                               | 24.35±12.48 | 99  | 60       | 118  | 6.96±6.46 | 140 | 68       | 69   | 35.12±9.20  | 99  | 67       | 111  |



|                                                                                                                       |                |      |             |     |      |     |           |     |      |    |             |     |      |     |  |
|-----------------------------------------------------------------------------------------------------------------------|----------------|------|-------------|-----|------|-----|-----------|-----|------|----|-------------|-----|------|-----|--|
| Married                                                                                                               | 149<br>(35.0%) | 30   | 24.93±12.17 | 50  | 33   | 66  | 7.21±6.59 | 74  | 33   | 42 | 35.02±9.70  | 55  | 28   | 66  |  |
| <i>P</i> value                                                                                                        |                | 0.08 | 0.65        |     | 0.67 |     | 0.70      |     | 0.67 |    | 0.92        |     | 0.71 |     |  |
| <b>Years of experience as a registered nurse</b> (Median, 3 yrs; interval, 0-32 yrs; interquartile interval, 3-7 yrs) |                |      |             |     |      |     |           |     |      |    |             |     |      |     |  |
| <5                                                                                                                    | 268<br>(62.9%) | 33   | 23.54±12.10 | 102 | 59   | 107 | 6.90±6.40 | 137 | 66   | 65 | 35.43±9.21  | 99  | 61   | 108 |  |
| 5-10                                                                                                                  | 107<br>(25.1%) | 27   | 27.38±12.33 | 29  | 24   | 54  | 7.99±6.99 | 47  | 23   | 37 | 33.58±8.95  | 30  | 27   | 50  |  |
| 11-19                                                                                                                 | 39<br>(9.2%)   | 6    | 23.87±13.52 | 13  | 8    | 18  | 5.62±5.64 | 23  | 9    | 7  | 36.15±11.22 | 19  | 5    | 15  |  |
| 20 or more                                                                                                            | 12<br>(2.8%)   | 2    | 24.00±12.15 | 5   | 2    | 5   | 6.50±6.36 | 7   | 3    | 2  | 37.33±9.37  | 6   | 2    | 4   |  |
| <i>P</i> value                                                                                                        |                | 0.02 | 0.06        |     | 0.19 |     | 0.23      |     | 0.15 |    | 0.23        |     | 0.22 |     |  |
| <b>Years of experience as an ICU nurse</b> (Median, 2 yrs; interval, 0-20 yrs; interquartile interval, 1-4 yrs)       |                |      |             |     |      |     |           |     |      |    |             |     |      |     |  |
| <5                                                                                                                    | 332<br>(77.9%) | 46   | 23.89±12.07 | 123 | 73   | 136 | 6.84±6.35 | 169 | 82   | 81 | 35.32±9.19  | 121 | 77   | 134 |  |
| 5-10                                                                                                                  | 82<br>(19.2%)  | 20   | 27.38±13.44 | 22  | 18   | 42  | 7.83±7.18 | 40  | 14   | 28 | 33.65±9.92  | 26  | 17   | 39  |  |
| 11-19                                                                                                                 | 10<br>(2.3%)   | 2    | 24.00±11.08 | 3   | 2    | 5   | 7.70±6.15 | 4   | 4    | 2  | 37.20±10.22 | 5   | 1    | 4   |  |
| 20 or more                                                                                                            | 2<br>(0.5%)    | 0    | 21.50±12.02 | 1   | 0    | 1   | 5.50±3.54 | 1   | 1    | 0  | 44.00±4.24  | 2   | 0    | 0   |  |
| <i>P</i> value                                                                                                        |                | 0.11 | 0.15        |     | 0.29 |     | 0.63      |     | 0.76 |    | 0.22        |     | 0.23 |     |  |

SD: Standard deviation. Percentages may not add up to 100% due to rounding.

## 1 DISCUSSION

2 This multi-center study revealed that as many as 16% of the ICU nursing team  
3 showed a high level of burnout in all three dimensions. For each subscale, the  
4 highest proportion of high-degree (43.2%) was found in the emotional exhaustion  
5 subscale, followed by 41.2% in personal accomplishment subscale and 26.1% in  
6 depersonalization subscale. Given the fact that the well-being of the ICU nurses is of  
7 critical importance to the quality of critically ill patients who are likely to benefit from  
8 ICU care, this kind of investigation into the burnout level of this population could  
9 catch more attention to ICU caregivers.

10 In Liaoning, China, there are still no complete epidemiologic data to state the actual,  
11 overall situation regarding burnout status among ICU nurses, to the best of our  
12 knowledge, this is the first burnout study among Liaoning ICU nurses. Most of the  
13 respondents indicated that the investigation from nurses' perspective might  
14 contribute to not only the mutual understanding between nurse leaders, ICU  
15 managers and nurses, but also their greater self-awareness of burnout. This study  
16 strengthened the power of the Critical Care Special Committee nested in Nursing  
17 Association of China Liaoning Branch and added an appeal to the nurse students to  
18 work in ICU. When focusing on the prevalence and the prevention of occupational  
19 burnout in order to develop effective interventions, a few characteristics should be  
20 taken into account. There is a linear relationship between emotional exhaustion and  
21 depersonalization, both subscales, emotional exhaustion and depersonalization can  
22 discriminate between burned out and non-burned out employees.[17] On the other  
23 hand, low levels of personal accomplishment and high degree of depersonalization in  
24 the burnout scores may actually be protective against stress.[18] Moreover, high  
25 levels of emotional exhaustion cause stress and that stress causes high levels of  
26 emotional exhaustion. In addition, depersonalization may reduce stress, whereas  
27 high degrees of personal accomplishment may increase stress levels.[19]

1  
2  
3 1 The present study has its limitations. Firstly, out of the 17 invited ICUs, three ICUs  
4  
5 2 were excluded, one ICU was at the rearrangement stage due to the decoration  
6  
7 3 during the study period, one ICU was at the beginning stage of being short of ICU  
8  
9 4 nurses that the patient-to-nurse ratio was distinct from others, and one ICU was  
10  
11 5 open-type ICU that the management mode was distinct from the other fourteen  
12  
13 6 included ICUs. Although the rate of response to the questionnaire was excellent, five  
14  
15 7 nurses refused to return the questionnaire after the introduction of the study  
16  
17 8 objectives. This refusal might have been related to that they were already exhausted  
18  
19 9 at that time due to various reasons, such as, heavy work load. Secondly, the  
20  
21 10 researcher in each participating ICU was the ICU head nurse, and to some extent,  
22  
23 11 the firsthand acquaintance might affect the information those nurses provided. We  
24  
25 12 tried to minimize the kind of worry, the anonymous questionnaire was a structured  
26  
27 13 questionnaire, the participants only needed to put a tick opposite each choice, the  
28  
29 14 pen they used was also provided by the stationery office of each hospital. Thus, it  
30  
31 15 was difficult to trace the participant information according to these tick marks. Thirdly,  
32  
33 16 the number of nurses in each participating hospital was more than one thousand, the  
34  
35 17 demographic data of total registered nurses in the hospital was available for 3  
36  
37 18 hospitals, thus those data for the ICU nurses from those 3 nested ICUs could be  
38  
39 19 compared to the total registered nurses of the hospital, and no statistical differences  
40  
41 20 were found. In addition, there may have been important differences of various clinical  
42  
43 21 settings, for example, work climate, the characteristics of the patients, work load,  
44  
45 22 relationship between doctors and nurses, institutional policy, coping strategies and  
46  
47 23 etc, the results are not generalizable to all Chinese ICU nurses as a whole.  
48  
49  
50 24 This proportion of burnout (16% in all 3 dimensions, and 26.1% to 43.2% in each  
51  
52 25 single subscale) among Liaoning ICU nurses that experienced a high degree of  
53  
54 26 burnout is in the range of several recently published studies that reported the  
55  
56 27 distribution of high-level burnout among ICU nurses, around one-third of the ICU  
57  
58  
59  
60

1  
2  
3 1 nurses having a high level of burnout.[20-23] In 2005, a Maslach Burnout Inventory-  
4  
5 2 General Survey based investigation was conducted in a convenience sample of staff  
6  
7 3 nurses in Henan province in China.[24] In this study the participants were all females,  
8  
9 4 mean age was 29 years with a range from 18 to 60 years and 66% had experience in  
10  
11 5 nursing for 5 years or more. They focused on the nurses from provincial hospitals,  
12  
13 6 supported the view that nurses commonly experience burnout. The authors reported  
14  
15 7 that scores for burnout of surgical and medical nurses were statistically significantly  
16  
17 8 higher than those of other nurses, lower educational status was associated with  
18  
19 9 higher levels of burnout in young nurses. However, in the present study, the highest  
20  
21 10 proportion of the nurses experiencing high degree of burnout was found for the  
22  
23 11 nurses with 5 to 10 years' employment as a registered nurse. Around 11.5% of the  
24  
25 12 participants in our study were males, and 63% of the included ICU nurses had less  
26  
27 13 than 5 years of employment as a registered nurse. The differences between that  
28  
29 14 study and our study revealed that burnout was associated with demographic  
30  
31 15 characteristics, such as age, educational level, the kind of clinical setting and years  
32  
33 16 of employment as a nurse or an ICU nurse, cautions should be exercised when  
34  
35 17 comparing the results originated from different studies.[24]

36  
37  
38 18 This result might help the ICU head nurse to take some actions to explore the  
39  
40 19 feelings, concerns and difficulties of ICU nurses and explore possible solutions and  
41  
42 20 interventions correspondingly.[25,26] High-risk factors[27] and possible protective  
43  
44 21 factors[28,29] that associated with burnout level in Liaoning ICU nurses, such as  
45  
46 22 work environment, job satisfaction, social support and coping strategies will be  
47  
48 23 explored in the next stage of the SUBLIN study.

49  
50 24 **Appendix**-Study Team (SUBLIN Study), Chun-Mei Gu, Li-Huan Hu, Hong-Fei Li, Li-  
51  
52 25 Hong Liu, Long-Feng Sun, Xuan Wang, Xiao-Jiang Yu, Jun-Li Zhang, Li-Hong Zhang,  
53  
54 26 Shen-Ping Zhang, Wen-Jing Zhao, Li-Yuan Zheng.

55  
56  
57 27 **Acknowledgements**  
58  
59  
60

1 This project was made possible by the efforts of 14 collaborative ICUs from 10  
2 hospitals and by the enthusiastic support and active participation of the nurses.

### 3 **Contributors**

4 X CZ conceived of the study, participated in its design and coordination. XZ and PG  
5 had full access to all of the data in the study, took responsibility for the integrity of the  
6 data and the accuracy of the data analysis and drafted the manuscript. DSH  
7 participated in its design, analysis and coordination, and helped to draft the  
8 manuscript. All authors reviewed and approved the final manuscript.

### 9 **Funding**

10 This work was supported by the Natural Science Foundation of Liaoning Province,  
11 China, grant number 201320014. This work was also a part of the programme for  
12 Elaborate Course of Epidemiology and Key Disciplines Construction supported by  
13 China Medical University, grant number CMU Internal Circular-J-[2010]-16-31 and  
14 Internal Circular-F-[2011]-5).

### 15 **Competing interests**

16 None

### 17 **REFERENCES**

- 18 1. Nardi DA, Gyurko CC. The global nursing faculty shortage: status and solutions for  
19 change. *J Nurs Scholarsh* 2013;**45**:317-26.
- 20 2. Reinert J, Bigelow A, Kautz DD. Overcoming nursing faculty shortages and  
21 bridging the gap between education and practice. *J Nurses Staff Dev* 2012;**28**:216-  
22 8.
- 23 3. Ahmed SM, Hossain MA, Rajachowdhury AM, Bhuiya AU. The health workforce  
24 crisis in Bangladesh: shortage, inappropriate skill-mix and inequitable distribution.  
25 *Hum Resour Health* 2011;**9**:3.

- 1 4. Farsi Z, Dehghan-Nayeri N, Negarandeh R, *et al.* Nursing profession in Iran: an  
2 overview of opportunities and challenges. *Jpn J Nurs Sci* 2010;**7**:9-18.
- 3 5. Duvall JJ, Andrews DR. Using a structured review of the literature to identify key  
4 factors associated with the current nursing shortage. *J Prof Nurs* 2010;**26**:309-17.
- 5 6. Wynn SD. Addressing the nursing workforce shortage: veterans as mental health  
6 nurses. *J Psychosoc Nurs Ment Health Serv* 2013;**51**:3-4.
- 7 7. Chan ZC, Tam WS, Lung MK, *et al.* A systematic literature review of nurse  
8 shortage and the intention to leave. *J Nurs Manag* 2013;**21**:605-13.
- 9 8. Hsiao WC. When incentives and professionalism collide. *Health Aff (Millwood)*  
10 2008;**27**:949-51.
- 11 9. Ma J, Lu M, Quan H. From a national, centrally planned health system to a system  
12 based on the market: lessons from China. *Health Aff (Millwood)* 2008;**27**:937-48.
- 13 10. Yu D, Li T. Facing up to the threat in China. *Lancet* 2010;**376**:1823-4.
- 14 11. Wagstaff A, Yip W, Lindelow M, *et al.* China's health system and its reform: a  
15 review of recent studies. *Health Econ* 2009;**18**:S7-23.
- 16 12. Du B, Xi X, Chen D, Peng J, *et al.* Clinical review: critical care medicine in  
17 mainland China. *Crit Care* 2010;**14**:206.
- 18 13. Maslach C, Jackson SE. The measurement of experienced burnout. *J Occup*  
19 *Behav* 1981;**2**:99-113.
- 20 14. Ye ZH, Luo H, Jiang HL. Diagnostic standard and norms of Maslach Burnout  
21 Inventory for nurses in Hangzhou. *Chinese Journal of Nursing* 2008;**43**:207-9. (in  
22 Chinese)
- 23 15. Schaufeli WB, Van Dierendonck D. A cautionary note about the cross-national  
24 and clinical validity of cut-off points for the Maslach Burnout Inventory. *Psychol Rep*  
25 1995;**76**:1083-90.

- 1  
2  
3 16. Wu J, Dai Y, Ning Y, *et al.* Study of the status and correlative factors of job  
4 burnout among nurses in Xinjiang. *Journal of Nursing Administration* 2011;**11**:7-9.  
5  
6 (in Chinese)  
7  
8  
9  
10 17. Schaufeli WB, Bakker AB, Hoogduin K, *et al.* on the clinical validity of the  
11 maslach burnout inventory and the burnout measure. *Psychol Health* 2001;**16**:565-  
12 82.  
13  
14  
15 18. Onder C, Basim N. Examination of developmental models of occupational  
16 burnout using burnout profiles of nurses. *J Adv Nurs* 2008;**64**:514-23.  
17  
18  
19 19. McManus IC, Winder BC, Gordon D. The causal links between stress and  
20 burnout in a longitudinal study of UK doctors. *Lancet* 2002;**359**:2089-90.  
21  
22  
23 20. Teixeira C, Ribeiro O, Fonseca AM, *et al.* Burnout in intensive care units - a  
24 consideration of the possible prevalence and frequency of new risk factors: a  
25 descriptive correlational multicentre study. *BMC Anesthesiol* 2013;**13**:38.  
26  
27  
28  
29 21. Poncet MC, Toullic P, Papazian L, *et al.* Burnout syndrome in critical care nursing  
30 staff. *Am J Respir Crit Care Med* 2007;**175**:698-704.  
31  
32  
33 22. Verdon M, Merlani P, Perneger T, *et al.* Burnout in a surgical ICU team. *Intensive*  
34 *Care Med* 2008;**34**:152-6.  
35  
36  
37 23. Liu K, You LM, Chen SX, *et al.* The relationship between hospital work  
38 environment and nurse outcomes in Guangdong, China: a nurse questionnaire  
39 survey. *J Clin Nurs* 2012;**21**:1476-85.  
40  
41  
42  
43 24. Wu S, Zhu W, Wang Z, *et al.* Relationship between burnout and occupational  
44 stress among nurses in China. *J Adv Nurs* 2007;**59**:233-9.  
45  
46  
47  
48 25. Yao Y, Yao W, Wang W, *et al.* Investigation of risk factors of psychological  
49 acceptance and burnout syndrome among nurses in China. *Int J Nurs Pract*  
50 2013;**19**:530-8.  
51  
52  
53  
54  
55  
56  
57  
58  
59  
60

- 1  
2  
3 1 26. Lei W, Youn Hee K, Dong W. A review of research and strategies for burnout  
4  
5 2 among Chinese nurses. *Br J Nurs* 2010;**19**:844-50.  
6  
7 3 27. Karanikola MN, Papathanassoglou ED, Mpouzika M, *et al.* Burnout syndrome  
8  
9 4 indices in Greek intensive care nursing personnel. *Dimens Crit Care Nurs*  
10  
11 5 2012;**31**:94-101.  
12  
13 6 28. Quenot JP, Rigaud JP, Prin S, *et al.* Suffering among carers working in critical  
14  
15 7 care can be reduced by an intensive communication strategy on end-of-life  
16  
17 8 practices. *Intensive Care Med* 2012;**38**:55-61.  
18  
19 9 29. Beanland C. Tackling the workforce shortage. *Aust Nurs J* 2013;**20**:47-8.  
20  
21  
22  
23  
24  
25  
26  
27  
28  
29  
30  
31  
32  
33  
34  
35  
36  
37  
38  
39  
40  
41  
42  
43  
44  
45  
46  
47  
48  
49  
50  
51  
52  
53  
54  
55  
56  
57  
58  
59  
60



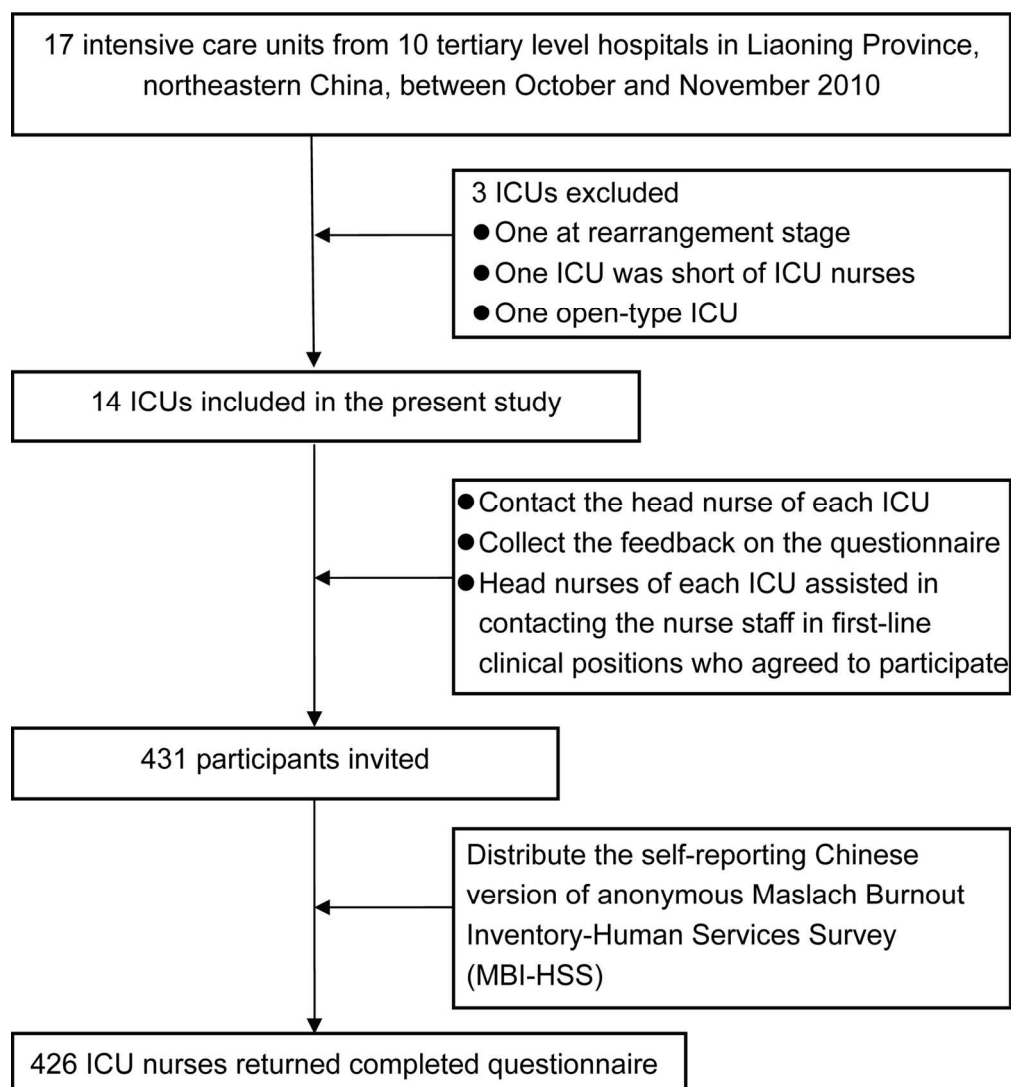

148x160mm (300 x 300 DPI)

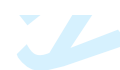

**STROBE 2007 (v4) Statement—Checklist of items that should be included in reports  
of cross-sectional studies**

| Section/Topic                | Item # | Recommendation                                                                                                                                                                       | Reported on page # |
|------------------------------|--------|--------------------------------------------------------------------------------------------------------------------------------------------------------------------------------------|--------------------|
| Title and abstract           | 1      | (a) Indicate the study's design with a commonly used term in the title or the abstract                                                                                               | #1                 |
|                              |        | (b) Provide in the abstract an informative and balanced summary of what was done and what was found                                                                                  | #2                 |
| <b>Introduction</b>          |        |                                                                                                                                                                                      |                    |
| Background/rationale         | 2      | Explain the scientific background and rationale for the investigation being reported                                                                                                 | #4                 |
| Objectives                   | 3      | State specific objectives, including any prespecified hypotheses                                                                                                                     | #5                 |
| <b>Methods</b>               |        |                                                                                                                                                                                      |                    |
| Study design                 | 4      | Present key elements of study design early in the paper                                                                                                                              | #5                 |
| Setting                      | 5      | Describe the setting, locations, and relevant dates, including periods of recruitment, exposure, follow-up, and data collection                                                      | #5                 |
| Participants                 | 6      | (a) Give the eligibility criteria, and the sources and methods of selection of participants                                                                                          | #5,#7              |
| Variables                    | 7      | Clearly define all outcomes, exposures, predictors, potential confounders, and effect modifiers. Give diagnostic criteria, if applicable                                             | #6-#7              |
| Data sources/<br>measurement | 8*     | For each variable of interest, give sources of data and details of methods of assessment (measurement). Describe comparability of assessment methods if there is more than one group | #6-#7              |
| Bias                         | 9      | Describe any efforts to address potential sources of bias                                                                                                                            | #14                |
| Study size                   | 10     | Explain how the study size was arrived at                                                                                                                                            | #5                 |
| Quantitative variables       | 11     | Explain how quantitative variables were handled in the analyses. If applicable, describe which groupings were chosen and why                                                         | #7                 |
| Statistical methods          | 12     | (a) Describe all statistical methods, including those used to control for confounding                                                                                                | #7-#8              |
|                              |        | (b) Describe any methods used to examine subgroups and interactions                                                                                                                  | #8                 |
|                              |        | (c) Explain how missing data were addressed                                                                                                                                          | NA                 |
|                              |        | (d) If applicable, describe analytical methods taking account of sampling strategy                                                                                                   | NA                 |

|                          |     |                                                                                                                                                                                                              |         |
|--------------------------|-----|--------------------------------------------------------------------------------------------------------------------------------------------------------------------------------------------------------------|---------|
|                          |     | (e) Describe any sensitivity analyses                                                                                                                                                                        | NA      |
| <b>Results</b>           |     |                                                                                                                                                                                                              |         |
| Participants             | 13* | (a) Report numbers of individuals at each stage of study—eg numbers potentially eligible, examined for eligibility, confirmed eligible, included in the study, completing follow-up, and analysed            | #7-#10  |
|                          |     | (b) Give reasons for non-participation at each stage                                                                                                                                                         | #7      |
|                          |     | (c) Consider use of a flow diagram                                                                                                                                                                           | Yes     |
| Descriptive data         | 14* | (a) Give characteristics of study participants (eg demographic, clinical, social) and information on exposures and potential confounders                                                                     | #8-#10  |
|                          |     | (b) Indicate number of participants with missing data for each variable of interest                                                                                                                          | NA      |
| Outcome data             | 15* | Report numbers of outcome events or summary measures                                                                                                                                                         | #9-#12  |
| Main results             | 16  | (a) Give unadjusted estimates and, if applicable, confounder-adjusted estimates and their precision (eg, 95% confidence interval). Make clear which confounders were adjusted for and why they were included | #10     |
|                          |     | (b) Report category boundaries when continuous variables were categorized                                                                                                                                    | #11-#12 |
|                          |     | (c) If relevant, consider translating estimates of relative risk into absolute risk for a meaningful time period                                                                                             | NA      |
| Other analyses           | 17  | Report other analyses done—eg analyses of subgroups and interactions, and sensitivity analyses                                                                                                               | #11-#12 |
| <b>Discussion</b>        |     |                                                                                                                                                                                                              |         |
| Key results              | 18  | Summarise key results with reference to study objectives                                                                                                                                                     | #13     |
| Limitations              | 19  | Discuss limitations of the study, taking into account sources of potential bias or imprecision. Discuss both direction and magnitude of any potential bias                                                   | #14     |
| Interpretation           | 20  | Give a cautious overall interpretation of results considering objectives, limitations, multiplicity of analyses, results from similar studies, and other relevant evidence                                   | #15     |
| Generalisability         | 21  | Discuss the generalisability (external validity) of the study results                                                                                                                                        | #15     |
| <b>Other information</b> |     |                                                                                                                                                                                                              |         |
| Funding                  | 22  | Give the source of funding and the role of the funders for the present study and, if applicable, for the original study on which the present article is based                                                | #16     |

1  
2  
3 \*Give information separately for cases and controls in case-control studies and, if applicable, for  
4 exposed and unexposed groups in cohort and cross-sectional studies.  
5

6  
7 **Note:** An Explanation and Elaboration article discusses each checklist item and gives methodological  
8 background and published examples of transparent reporting. The STROBE checklist is best used in  
9 conjunction with this article (freely available on the Web sites of PLoS Medicine at  
10 <http://www.plosmedicine.org/>, Annals of Internal Medicine at <http://www.annals.org/>, and  
11 Epidemiology at <http://www.epidem.com/>). Information on the STROBE Initiative is available at  
12 [www.strobe-statement.org](http://www.strobe-statement.org).  
13  
14  
15  
16  
17  
18  
19  
20  
21  
22  
23  
24  
25  
26  
27  
28  
29  
30  
31  
32  
33  
34  
35  
36  
37  
38  
39  
40  
41  
42  
43  
44  
45  
46  
47  
48  
49  
50  
51  
52  
53  
54  
55  
56  
57  
58  
59  
60
